# Supplementary material for: The Role of Google Scholar in Evidence Reviews and Its Applicability to Grey Literature Searching
Source: PLoS One. 2015 Sep 17;10(9):e0138237. doi: 10.1371/journal.pone.0138237 (PMC4574933; doi:10.1371/journal.pone.0138237)
Supplement: S1 File — Database of Google Scholar full text and title searches for 7 case study systematic reviews. (XLSX) [file pone.0138237.s002.xlsx]

## Sheet: SR1 Full Text
Generated on September 18th 2014 at 3:21:11pm by nealhaddaway		Reasons:	both duplicates due to inclusion of [C] citations as well as real articles
Result number	Source Page URL	Page number	Title	Link	Authors	Journal	Year	Source	Grey/Black	Description	Gs citations	Full text	Format	GS search link
1	http://127.0.0.1:8000/scholar_000.html	1	Long-term effect of forest drainage on the peat carbon stores of pine mires in Finland	http://www.nrcresearchpress.com/doi/abs/10.1139/x98-104	K Minkkinen, J Laine	Canadian Journal of Forest Research	1998	NRC Research Press	Black	The drawdown of the water level has been hypothesized to change peatlands from carbon (C) sinks to C sources to the atmosphere as a result of increased oxidation of organic matter. We measured the change in peat thickness (subsidence of peat surface) ca. 60 years after ...	143	http://127.0.0.1:8000/scholar?q=info:3x6B8W3klIIJ:scholar.google.com/&output=instlink&hl=en&as_sdt=0,5&scillfp=7000178013804716542&oi=lle		http://scholar.google.co.uk/scholar?hl=en&q=%22Long-term+effect+of+forest+drainage+on+the+peat+carbon+stores+of+pine+mires+in+Finland%22&btnG=&as_sdt=1%2C5&as_sdtp=
2	http://127.0.0.1:8000/scholar_000.html	1	Carbon -13 and carbon -14 abundances in Alaskan aquatic organisms: delayed production from peat in arctic food webs	http://www.sciencemag.org/content/219/4588/1068.short	DM Schell	Science	1983	sciencemag.org	Black	Abstract Inputs of terrestrial peat carbon to the nearshore Alaskan Beaufort Sea from erosion and fluvial transport are of the same magnitude as in situ primary production within 10 kilometers of shore. Nevertheless, carbon-13/carbon-12 ratios and carbon-14 ...	117	http://127.0.0.1:8000/scholar?q=info:j5Q2RMkayi8J:scholar.google.com/&output=instlink&hl=en&as_sdt=0,5&scillfp=6347693555216177704&oi=lle		http://scholar.google.co.uk/scholar?hl=en&q=%22Carbon+-13+and+carbon+-14+abundances+in+Alaskan+aquatic+organisms:+delayed+production+from+peat+in+arctic+food+webs%22&btnG=&as_sdt=1%2C5&as_sdtp=
3	http://127.0.0.1:8000/scholar_000.html	1	Peat CO2 production in a natural and cutover peatland: implications for restoration	http://link.springer.com/article/10.1023/A:1010617207537	JM Waddington , PA Rotenberg, FJ Warren	Biogeochemistry	2001	Springer	Black	Abstract Although studies have shown that peatland drainage andharvesting alter local hydrology, microclimate, and peatcharacteristics, little is known about the effects of these changes onCO 2 production rates. This study examines the differentfactors affecting CO 2 ...	76	http://www.create.ulaval.ca/uploads/tx_centrerecherche/Waddington_et_al_2001__Biogeochem__01.pdf		http://scholar.google.co.uk/scholar?hl=en&q=%22Peat+CO2+production+in+a+natural+and+cutover+peatland:+implications+for+restoration%22&btnG=&as_sdt=1%2C5&as_sdtp=
4	http://127.0.0.1:8000/scholar_000.html	1	[HTML] A high‐resolution GIS‐based inventory of the west Siberian peat carbon pool	http://onlinelibrary.wiley.com/doi/10.1029/2003GB002190/full	Y Sheng, LC Smith , GM MacDonald…	Global …	2004	Wiley Online Library	Black	[2] Northern peatlands play a dual role in the global cycles of carbon dioxide (CO2) and methane (CH4), both removing CO2 from the atmosphere (through plant production and peat accumulation) and emitting CO2 and CH4 to the atmosphere in large quantities. ...	81	http://onlinelibrary.wiley.com/doi/10.1029/2003GB002190/full	[HTML]	http://scholar.google.co.uk/scholar?hl=en&q=%22[HTML]+A+high‐resolution+GIS‐based+inventory+of+the+west+Siberian+peat+carbon+pool%22&btnG=&as_sdt=1%2C5&as_sdtp=
5	http://127.0.0.1:8000/scholar_000.html	1	Siberian peatlands a net carbon sink and global methane source since the early Holocene	http://www.sciencemag.org/content/303/5656/353.short	LC Smith , GM MacDonald, AA Velichko, DW Beilman…	Science	2004	sciencemag.org	Black	... for catastrophic oxidation, suggesting the region represents a long-term carbon dioxide sink and ... difficult to infer the influence of northern peatlands on Holocene greenhouse gas concentrations and ... under a warmer Arctic climate through water table lowering, peat oxidation, and ...	275	http://wordpress.clarku.edu/kfrey/files/2011/01/Smith_Science2004.pdf		http://scholar.google.co.uk/scholar?hl=en&q=%22Siberian+peatlands+a+net+carbon+sink+and+global+methane+source+since+the+early+Holocene%22&btnG=&as_sdt=1%2C5&as_sdtp=
6	http://127.0.0.1:8000/scholar_000.html	1	Carbon isotopes in peat , DOC , CO2 , and CH4 in a Holocene peatland on Dartmoor, southwest England	http://geology.gsapubs.org/content/27/6/539.short	DJ Charman , R Aravena, CL Bryant, DD Harkness	Geology	1999		Black	Abstract Carbon gases with younger 14 C ages than those of the surrounding peat have been reported from continental boreal peatlands, a fact which suggests that significant movement of CO 2, CH 4, or DOC (dissolved organic carbon) and export of C via ...	49			http://scholar.google.co.uk/scholar?hl=en&q=%22Carbon+isotopes+in+peat+,+DOC+,+CO2+,+and+CH4+in+a+Holocene+peatland+on+Dartmoor,+southwest+England%22&btnG=&as_sdt=1%2C5&as_sdtp=
7	http://127.0.0.1:8000/scholar_000.html	1	Enigmatic stable isotope dynamics of deep peat methane	http://onlinelibrary.wiley.com/doi/10.1029/1998GB900002/full	S Waldron, AJ Hall, AE Fallick	Global biogeochemical cycles	1999	Wiley Online Library	Black	Abstract. The carbon and hydrogen stable isotope ratios of methane and carbon dioxide from Ellergower Moss, a raised peat bog in SW Scotland, were measured to characterize the isotopic composition of peatland gas flux that is not subject to near-surface bacterial ...	38	http://onlinelibrary.wiley.com/doi/10.1029/1998GB900002/pdf		http://scholar.google.co.uk/scholar?hl=en&q=%22Enigmatic+stable+isotope+dynamics+of+deep+peat+methane%22&btnG=&as_sdt=1%2C5&as_sdtp=
8	http://127.0.0.1:8000/scholar_000.html	1	The amount of carbon released from peat and forest fires in Indonesia during 1997	http://www.nature.com/nature/journal/v420/n6911/abs/nature01131.html	SE Page , F Siegert, JO Rieley, HDV Boehm, A Jaya…	Nature	2002	nature.com	Black	Abstract Tropical peatlands are one of the largest near-surface reserves of terrestrial organic carbon, and hence their stability has important implications for climate change 1, 2, 3. In their natural state, lowland tropical peatlands support a luxuriant growth of peat swamp forest ...	954	http://www.nature.com/nature/journal/v420/n6911/full/nature01131.html		http://scholar.google.co.uk/scholar?hl=en&q=%22The+amount+of+carbon+released+from+peat+and+forest+fires+in+Indonesia+during+1997%22&btnG=&as_sdt=1%2C5&as_sdtp=
9	http://127.0.0.1:8000/scholar_000.html	1	[PDF] PEAT - CO2	http://wetlands.or.id/PDF/buku/Peat%20CO2.pdf	A Hooijer , M Silvius, H Wösten, S Page …	Assessment of CO2 …	2006		Grey	Summary Forested tropical peatlands in SE Asia store at least 42,000 Megatonnes of soil carbon. This carbon is increasingly released to the atmosphere due to drainage and fires associated with plantation development and logging. Peatlands make up 12% of the SE ...	294	http://wetlands.or.id/PDF/buku/Peat%20CO2.pdf	[PDF]	http://scholar.google.co.uk/scholar?hl=en&q=%22[PDF]+PEAT+-+CO2%22&btnG=&as_sdt=1%2C5&as_sdtp=
10	http://127.0.0.1:8000/scholar_000.html	1	Carbon pools and accumulation in peatlands of the former Soviet Union	http://onlinelibrary.wiley.com/doi/10.1029/94GB03156/full	MS Botch, KI Kobak, TS Vinson…	Global …	1995	Wiley Online Library	Black	... The peat carbon pool was estimated at 215 Pg C. Half of this amount was in raised bogs. ... On the basis of a review of published data [MacFarlane, 1969; Tjurernnov, 1976; Pjavchenko, 1985], two different values of peat carbon content were assumed. ...	170			http://scholar.google.co.uk/scholar?hl=en&q=%22Carbon+pools+and+accumulation+in+peatlands+of+the+former+Soviet+Union%22&btnG=&as_sdt=1%2C5&as_sdtp=
11	http://127.0.0.1:8000/scholar_000.html	1	Peat carbon stocks in the southern Mackenzie River Basin: Uncertainties revealed in a high‐resolution case study	http://onlinelibrary.wiley.com/doi/10.1111/j.1365-2486.2008.01565.x/full	DW Beilman, DH Vitt, JS Bhatti …	Global Change …	2008	Wiley Online Library	Black	Abstract The organic carbon (C) stocks contained in peat were estimated for a wetland-rich boreal region of the Mackenzie River Basin, Canada, using high-resolution wetland map data, available peat C characteristic and peat depth datasets, and geostatistics. Peatlands ...	26	http://127.0.0.1:8000/scholar?q=info:yDl1miGw9W4J:scholar.google.com/&output=instlink&hl=en&as_sdt=0,5&scillfp=6154873689865318653&oi=lle		http://scholar.google.co.uk/scholar?hl=en&q=%22Peat+carbon+stocks+in+the+southern+Mackenzie+River+Basin:+Uncertainties+revealed+in+a+high‐resolution+case+study%22&btnG=&as_sdt=1%2C5&as_sdtp=
12	http://127.0.0.1:8000/scholar_000.html	1	Soil temperature response to 21st century global warming: the role of and some implications for peat carbon in thawing permafrost soils in North America	http://www.earth-syst-dynam.net/2/121/	D Wisser , S Marchenko, J Talbot , C Treat…	Earth System …	2011		Black	Abstract. Northern peatlands contain a large terrestrial carbon pool that plays an important role in the Earth's carbon cycle. A considerable fraction of this carbon pool is currently in permafrost and is biogeochemically relatively inert; this will change with increasing soil ...	25	http://www.earth-syst-dynam.net/2/121/2011/esd-2-121-2011.pdf		http://scholar.google.co.uk/scholar?hl=en&q=%22Soil+temperature+response+to+21st+century+global+warming:+the+role+of+and+some+implications+for+peat+carbon+in+thawing+permafrost+soils+in+North+America%22&btnG=&as_sdt=1%2C5&as_sdtp=
13	http://127.0.0.1:8000/scholar_000.html	1	Stable isotope constraints on Holocene carbon cycle changes from an Antarctic ice core	http://www.nature.com/nature/journal/v461/n7263/abs/nature08393.html	J Elsig, J Schmitt, D Leuenberger, R Schneider, M Eyer…	Nature	2009	nature.com	Black	... 23), also implying a higher uptake by peat. ... Guest article by William Ruddiman More than 20 years ago, analyses of greenhouse gas concentrations in ice cores showed that downward trends in CO2 and CH4 that had begun near 10,000 years ago subsequentl... ...	97	http://www.nature.com/nature/journal/v461/n7263/full/nature08393.html		http://scholar.google.co.uk/scholar?hl=en&q=%22Stable+isotope+constraints+on+Holocene+carbon+cycle+changes+from+an+Antarctic+ice+core%22&btnG=&as_sdt=1%2C5&as_sdtp=
14	http://127.0.0.1:8000/scholar_000.html	1	Export of organic carbon from peat soils	http://www.nature.com/nature/journal/v412/n6849/full/412785a0.html	C Freeman , CD Evans , DT Monteith , B Reynolds…	Nature	2001	nature.com	Black	DOC concentrations have increased significantly (P < 0.05) at 20 of 22 sites in the UK Acid Waters Monitoring Network 2 , according to the Seasonal Kendall trend analysis (Fig. 1a). These sites span a wide range of acid-deposition levels, soils, topographies, land uses and ...	618	http://127.0.0.1:8000/scholar?q=info:47ma8m2TZH8J:scholar.google.com/&output=instlink&hl=en&as_sdt=0,5&scillfp=8593636675263302365&oi=lle		http://scholar.google.co.uk/scholar?hl=en&q=%22Export+of+organic+carbon+from+peat+soils%22&btnG=&as_sdt=1%2C5&as_sdtp=
15	http://127.0.0.1:8000/scholar_000.html	1	[C] Accumulation of peat carbon in the Alaska Arctic Coastal Plain and its role in biological productivity		DM Schell, PJ Ziemann	… Proceedings			Conference		20		[CITATION]	http://scholar.google.co.uk/scholar?hl=en&q=%22[C]+Accumulation+of+peat+carbon+in+the+Alaska+Arctic+Coastal+Plain+and+its+role+in+biological+productivity%22&btnG=&as_sdt=1%2C5&as_sdtp=
16	http://127.0.0.1:8000/scholar_000.html	1	Effects of dissolved organic carbon on sorption and mobility of imidacloprid in soil	https://dl.sciencesocieties.org/publications/jeq/abstracts/31/3/880	F Flores-Céspedes…	Journal of …	2002		Black	... contamination. Abbreviations: DOC-PE, dissolved organic carbon extracts from peat DOC-TA, dissolved organic carbon extracts from tannic acid HPLC, high performance liquid cromatography RC, retardation coefficient. E ntrance ...	76			http://scholar.google.co.uk/scholar?hl=en&q=%22Effects+of+dissolved+organic+carbon+on+sorption+and+mobility+of+imidacloprid+in+soil%22&btnG=&as_sdt=1%2C5&as_sdtp=
17	http://127.0.0.1:8000/scholar_000.html	1	The experimental approach to accurate carbon -13 spin-lattice relaxation measurements	http://www.sciencedirect.com/science/article/pii/0022236475901067	GC Levy, IR Peat	Journal of Magnetic Resonance (1969)	1975	Elsevier	Black	Abstract The experimental requirements for pulse FT NMR measurements of spin-lattice relaxation times (T 1's) are quite demanding. This paper treats many of the critical experimental parameters in T, experiments; the data and discussions rely on previous ...	235	http://127.0.0.1:8000/scholar?q=info:CFM4oeRiMFoJ:scholar.google.com/&output=instlink&hl=en&as_sdt=0,5&scillfp=10975960177528674207&oi=lle		http://scholar.google.co.uk/scholar?hl=en&q=%22The+experimental+approach+to+accurate+carbon+-13+spin-lattice+relaxation+measurements%22&btnG=&as_sdt=1%2C5&as_sdtp=
18	http://127.0.0.1:8000/scholar_000.html	1	[C] Introduction to carbon science	http://www.osti.gov/scitech/biblio/6506274	H Marsh			osti.gov	Book	Save searches, create alerts, and export data: Sign In or Create Account. ...	365		[CITATION]	http://scholar.google.co.uk/scholar?hl=en&q=%22[C]+Introduction+to+carbon+science%22&btnG=&as_sdt=1%2C5&as_sdtp=
19	http://127.0.0.1:8000/scholar_000.html	1	Methane production and consumption in temperate and subarctic peat soils: response to temperature and pH	http://www.sciencedirect.com/science/article/pii/0038071793901304	P Dunfield , R Dumont, TR Moore	Soil Biology and Biochemistry	1993	Elsevier	Black	Abstract Rates of methane (CH 4) production under anaerobic conditions and CH 4 consumption under aerobic conditions were studied in slurries of peat samples kept at different temperatures (0–35 C) and pH values (buffered at pH 3.5–8). Apparent Xn, CH 4 ...	476	http://127.0.0.1:8000/scholar?q=info:FG2DzmvH4tcJ:scholar.google.com/&output=instlink&hl=en&as_sdt=0,5&scillfp=18309185491563037915&oi=lle		http://scholar.google.co.uk/scholar?hl=en&q=%22Methane+production+and+consumption+in+temperate+and+subarctic+peat+soils:+response+to+temperature+and+pH%22&btnG=&as_sdt=1%2C5&as_sdtp=
20	http://127.0.0.1:8000/scholar_000.html	1	Carbon respiration from subsurface peat accelerated by climate warming in the subarctic	http://www.nature.com/nature/journal/v460/n7255/abs/nature08216.html	E Dorrepaal, S Toet, RSP van Logtestijn , E Swart…	Nature	2009	nature.com	Black	Abstract Among the largest uncertainties in current projections of future climate is the feedback between the terrestrial carbon cycle and climate 1. Northern peatlands contain one- third of the world's soil organic carbon, equivalent to more than half the amount of carbon ...	235	http://www.nature.com/nature/journal/v460/n7255/full/nature08216.html		http://scholar.google.co.uk/scholar?hl=en&q=%22Carbon+respiration+from+subsurface+peat+accelerated+by+climate+warming+in+the+subarctic%22&btnG=&as_sdt=1%2C5&as_sdtp=
21	http://127.0.0.1:8000/scholar_003.html	2	Peat carbon stocks in the southern Mackenzie River Basin: Uncertainties revealed in a high‐resolution case study	http://onlinelibrary.wiley.com/doi/10.1111/j.1365-2486.2008.01565.x/full	DW Beilman, DH Vitt, JS Bhatti …	Global Change …	2008	Wiley Online Library	Black	Abstract The organic carbon (C) stocks contained in peat were estimated for a wetland-rich boreal region of the Mackenzie River Basin, Canada, using high-resolution wetland map data, available peat C characteristic and peat depth datasets, and geostatistics. Peatlands ...	26	http://127.0.0.1:8000/scholar?q=info:yDl1miGw9W4J:scholar.google.com/&output=instlink&hl=en&as_sdt=0,5&scillfp=11890933116130724720&oi=lle		http://scholar.google.co.uk/scholar?hl=en&q=%22Peat+carbon+stocks+in+the+southern+Mackenzie+River+Basin:+Uncertainties+revealed+in+a+high‐resolution+case+study%22&btnG=&as_sdt=1%2C5&as_sdtp=
22	http://127.0.0.1:8000/scholar_003.html	2	Soil temperature response to 21st century global warming: the role of and some implications for peat carbon in thawing permafrost soils in North America	http://www.earth-syst-dynam.net/2/121/	D Wisser , S Marchenko, J Talbot , C Treat…	Earth System …	2011		Black	Abstract. Northern peatlands contain a large terrestrial carbon pool that plays an important role in the Earth's carbon cycle. A considerable fraction of this carbon pool is currently in permafrost and is biogeochemically relatively inert; this will change with increasing soil ...	25	http://www.earth-syst-dynam.net/2/121/2011/esd-2-121-2011.pdf		http://scholar.google.co.uk/scholar?hl=en&q=%22Soil+temperature+response+to+21st+century+global+warming:+the+role+of+and+some+implications+for+peat+carbon+in+thawing+permafrost+soils+in+North+America%22&btnG=&as_sdt=1%2C5&as_sdtp=
23	http://127.0.0.1:8000/scholar_003.html	2	Stable isotope constraints on Holocene carbon cycle changes from an Antarctic ice core	http://www.nature.com/nature/journal/v461/n7263/abs/nature08393.html	J Elsig, J Schmitt, D Leuenberger, R Schneider, M Eyer…	Nature	2009	nature.com	Black	... 23), also implying a higher uptake by peat. ... Guest article by William Ruddiman More than 20 years ago, analyses of greenhouse gas concentrations in ice cores showed that downward trends in CO2 and CH4 that had begun near 10,000 years ago subsequentl... ...	97	http://www.nature.com/nature/journal/v461/n7263/full/nature08393.html		http://scholar.google.co.uk/scholar?hl=en&q=%22Stable+isotope+constraints+on+Holocene+carbon+cycle+changes+from+an+Antarctic+ice+core%22&btnG=&as_sdt=1%2C5&as_sdtp=
24	http://127.0.0.1:8000/scholar_003.html	2	Export of organic carbon from peat soils	http://www.nature.com/nature/journal/v412/n6849/full/412785a0.html	C Freeman , CD Evans , DT Monteith , B Reynolds…	Nature	2001	nature.com	Black	DOC concentrations have increased significantly (P < 0.05) at 20 of 22 sites in the UK Acid Waters Monitoring Network 2 , according to the Seasonal Kendall trend analysis (Fig. 1a). These sites span a wide range of acid-deposition levels, soils, topographies, land uses and ...	618			http://scholar.google.co.uk/scholar?hl=en&q=%22Export+of+organic+carbon+from+peat+soils%22&btnG=&as_sdt=1%2C5&as_sdtp=
25	http://127.0.0.1:8000/scholar_003.html	2	Accumulation of peat carbon in the Alaska Arctic Coastal Plain and its role in biological productivity		DM Schell, PJ Ziemann	… Proceedings			Conference		20		[CITATION]	http://scholar.google.co.uk/scholar?hl=en&q=%22Accumulation+of+peat+carbon+in+the+Alaska+Arctic+Coastal+Plain+and+its+role+in+biological+productivity%22&btnG=&as_sdt=1%2C5&as_sdtp=
26	http://127.0.0.1:8000/scholar_003.html	2	Effects of dissolved organic carbon on sorption and mobility of imidacloprid in soil	https://dl.sciencesocieties.org/publications/jeq/abstracts/31/3/880	F Flores-Céspedes…	Journal of …	2002		Black	... contamination. Abbreviations: DOC-PE, dissolved organic carbon extracts from peat DOC-TA, dissolved organic carbon extracts from tannic acid HPLC, high performance liquid cromatography RC, retardation coefficient. E ntrance ...	76			http://scholar.google.co.uk/scholar?hl=en&q=%22Effects+of+dissolved+organic+carbon+on+sorption+and+mobility+of+imidacloprid+in+soil%22&btnG=&as_sdt=1%2C5&as_sdtp=
27	http://127.0.0.1:8000/scholar_003.html	2	The experimental approach to accurate carbon -13 spin-lattice relaxation measurements	http://www.sciencedirect.com/science/article/pii/0022236475901067	GC Levy, IR Peat	Journal of Magnetic Resonance (1969)	1975	Elsevier	Black	Abstract The experimental requirements for pulse FT NMR measurements of spin-lattice relaxation times (T 1's) are quite demanding. This paper treats many of the critical experimental parameters in T, experiments; the data and discussions rely on previous ...	235			http://scholar.google.co.uk/scholar?hl=en&q=%22The+experimental+approach+to+accurate+carbon+-13+spin-lattice+relaxation+measurements%22&btnG=&as_sdt=1%2C5&as_sdtp=
28	http://127.0.0.1:8000/scholar_003.html	2	Introduction to carbon science	http://www.osti.gov/scitech/biblio/6506274	H Marsh			osti.gov	Book	Save searches, create alerts, and export data: Sign In or Create Account. ...	365		[CITATION]	http://scholar.google.co.uk/scholar?hl=en&q=%22Introduction+to+carbon+science%22&btnG=&as_sdt=1%2C5&as_sdtp=
29	http://127.0.0.1:8000/scholar_003.html	2	Methane production and consumption in temperate and subarctic peat soils: response to temperature and pH	http://www.sciencedirect.com/science/article/pii/0038071793901304	P Dunfield , R Dumont, TR Moore	Soil Biology and Biochemistry	1993	Elsevier	Black	Abstract Rates of methane (CH 4) production under anaerobic conditions and CH 4 consumption under aerobic conditions were studied in slurries of peat samples kept at different temperatures (0–35 C) and pH values (buffered at pH 3.5–8). Apparent Xn, CH 4 ...	476			http://scholar.google.co.uk/scholar?hl=en&q=%22Methane+production+and+consumption+in+temperate+and+subarctic+peat+soils:+response+to+temperature+and+pH%22&btnG=&as_sdt=1%2C5&as_sdtp=
30	http://127.0.0.1:8000/scholar_003.html	2	Carbon respiration from subsurface peat accelerated by climate warming in the subarctic	http://www.nature.com/nature/journal/v460/n7255/abs/nature08216.html	E Dorrepaal, S Toet, RSP van Logtestijn , E Swart…	Nature	2009	nature.com	Black	Abstract Among the largest uncertainties in current projections of future climate is the feedback between the terrestrial carbon cycle and climate 1. Northern peatlands contain one- third of the world's soil organic carbon, equivalent to more than half the amount of carbon ...	235	http://www.nature.com/nature/journal/v460/n7255/full/nature08216.html		http://scholar.google.co.uk/scholar?hl=en&q=%22Carbon+respiration+from+subsurface+peat+accelerated+by+climate+warming+in+the+subarctic%22&btnG=&as_sdt=1%2C5&as_sdtp=
31	http://127.0.0.1:8000/scholar_000b.html	3	Climate change (communication arising): terrestrial export of organic carbon	http://www.nature.com/nature/journal/v415/n6874/abs/415861b.html	LJ Tranvik , M Jansson	Nature	2002	nature.com	Black	... This is illustrated by the substantial increase in DOC concentrations in lakes and streams in Sweden during the 1970s and 1980s, despite a ... and runoff in these locations 5, 6 , which are typical of the northern boreal region where a large proportion of global peat carbon is stored. ...	215	http://www.nature.com/nature/journal/v415/n6874/full/415861b.html		http://scholar.google.co.uk/scholar?hl=en&q=%22Climate+change+(communication+arising):+terrestrial+export+of+organic+carbon%22&btnG=&as_sdt=1%2C5&as_sdtp=
32	http://127.0.0.1:8000/scholar_000b.html	3	… and Holocene carbon accumulation and climate change from an equatorial peat bog (Kalimantan, Indonesia): implications for past, present and future carbon …	http://onlinelibrary.wiley.com/doi/10.1002/jqs.884/full	SE Page , RAJ Wűst, D Weiss , JO Rieley…	Journal of …	2004	Wiley Online Library	Black	Abstract A 9.5 m core from an inland peatland in Kalimantan, Indonesia, reveals organic matter accumulation started around 26 000 cal. yr BP, providing the oldest reported initiation date for lowland ombrotrophic peat formation in SE Asia. The core shows clear evidence ...	131	http://127.0.0.1:8000/scholar?q=info:TMFv4uQS-XIJ:scholar.google.com/&output=instlink&hl=en&as_sdt=0,5&scillfp=9348212298743878826&oi=lle		http://scholar.google.co.uk/scholar?hl=en&q=%22…+and+Holocene+carbon+accumulation+and+climate+change+from+an+equatorial+peat+bog+(Kalimantan,+Indonesia):+implications+for+past,+present+and+future+carbon+…%22&btnG=&as_sdt=1%2C5&as_sdtp=
33	http://127.0.0.1:8000/scholar_000b.html	3	Hydrogenotrophic methanogenesis by moderately acid-tolerant methanogens of a methane -emitting acidic peat	http://aem.asm.org/content/69/1/74.short	MA Horn, C Matthies, K Küsel…	Applied and …	2003	Am Soc Microbiol	Black	ABSTRACT The emission of methane (1.3 mmol of CH 4 m− 2 day− 1), precursors of methanogenesis, and the methanogenic microorganisms of acidic bog peat (pH 4.4) from a moderately reduced forest site were investigated by in situ measurements, microcosm ...	173	http://aem.asm.org/content/69/1/74.full		http://scholar.google.co.uk/scholar?hl=en&q=%22Hydrogenotrophic+methanogenesis+by+moderately+acid-tolerant+methanogens+of+a+methane+-emitting+acidic+peat%22&btnG=&as_sdt=1%2C5&as_sdtp=
34	http://127.0.0.1:8000/scholar_000b.html	3	Amplified carbon release from vast West Siberian peatlands by 2100	http://onlinelibrary.wiley.com/doi/10.1029/2004GL022025/full	KE Frey, LC Smith	Geophysical Research Letters	2005	Wiley Online Library	Black	... Both the A2 (less conservative) and B2 (more conservative) IPCC greenhouse gas emission scenarios are ... (1993), Recent change of Arctic tundra ecosystems from a net carbon dioxide sink to ... A high resolution GIS-based inventory of the West Siberian peat carbon pool, Global ...	166	http://onlinelibrary.wiley.com/doi/10.1029/2004GL022025/full	[HTML]	http://scholar.google.co.uk/scholar?hl=en&q=%22Amplified+carbon+release+from+vast+West+Siberian+peatlands+by+2100%22&btnG=&as_sdt=1%2C5&as_sdtp=
35	http://127.0.0.1:8000/scholar_000b.html	3	Potential carbon losses from peat profiles: effects of temperature, drought cycles, and fire	http://www.jstor.org/stable/1941863	EH Hogg , VJ Lieffers, RW Wein	Ecological Applications	1992	JSTOR	Black	Global warming and the resultant increase in evapotranspiration might lead to lowered water tables in peatlands and an increase in fire frequency. The objective of this study was to investigate some of the potential effects of these changes on peat decomposition. Dry ...	150			http://scholar.google.co.uk/scholar?hl=en&q=%22Potential+carbon+losses+from+peat+profiles:+effects+of+temperature,+drought+cycles,+and+fire%22&btnG=&as_sdt=1%2C5&as_sdtp=
36	http://127.0.0.1:8000/scholar_000b.html	3	Carbon dioxide balance of a tropical peat swamp forest in Kalimantan, Indonesia	http://onlinelibrary.wiley.com/doi/10.1111/j.1365-2486.2006.01301.x/full	T Hirano, H Segah , T Harada, S Limin…	Global Change …	2007	Wiley Online Library	Black	Abstract Tropical peatlands, which coexist with swamp forests, have accumulated vast amounts of carbon as soil organic matter. Since the 1970s, however, deforestation and drainage have progressed on an enormous scale. In addition, El Niño and Southern ...	110	http://127.0.0.1:8000/scholar?q=info:STEUR9xNsocJ:scholar.google.com/&output=instlink&hl=en&as_sdt=0,5&scillfp=4948102752605856913&oi=lle		http://scholar.google.co.uk/scholar?hl=en&q=%22Carbon+dioxide+balance+of+a+tropical+peat+swamp+forest+in+Kalimantan,+Indonesia%22&btnG=&as_sdt=1%2C5&as_sdtp=
37	http://127.0.0.1:8000/scholar_000b.html	3	Influence of drought‐induced acidification on the mobility of dissolved organic carbon in peat soils	http://onlinelibrary.wiley.com/doi/10.1111/j.1365-2486.2005.00937.x/full	JM Clark , PJ Chapman, JK Adamson…	Global Change …	2005	Wiley Online Library	Black	Abstract A strong relationship between dissolved organic carbon (DOC) and sulphate (SO 4 2−) dynamics under drought conditions has been revealed from analysis of a 10-year time series (1993–2002). Soil solution from a blanket peat at 10 cm depth and stream water ...	163	http://www.researchgate.net/publication/227701990_Influence_of_droughtinduced_acidification_on_the_mobility_of_dissolved_organic_carbon_in_peat_soils/file/5046352b762edec464.pdf		http://scholar.google.co.uk/scholar?hl=en&q=%22Influence+of+drought‐induced+acidification+on+the+mobility+of+dissolved+organic+carbon+in+peat+soils%22&btnG=&as_sdt=1%2C5&as_sdtp=
38	http://127.0.0.1:8000/scholar_000b.html	3	Rearrangement of carbon and nitrogen forms in peat after progressive thermal oxidation as determined by solid-state〈 sup〉 13〈/sup〉 C-and〈 sup〉 15〈/sup〉 N-NMR …	http://www.sciencedirect.com/science/article/pii/S0146638003001529	G Almendros, H Knicker , FJ González-Vila	Organic Geochemistry	2003	Elsevier	Black	Peat samples subjected to thermal oxidation were studied by solid-state 13C-and 15N-NMR spectroscopy, so as to gain information on the thermal alteration of organic matter during processes such as natural fires or prescribed fires affecting soils. The 13C-NMR spectra ...	161	http://127.0.0.1:8000/scholar?q=info:Q_HiT73W4uEJ:scholar.google.com/&output=instlink&hl=en&as_sdt=0,5&scillfp=17166479079401997754&oi=lle		http://scholar.google.co.uk/scholar?hl=en&q=%22Rearrangement+of+carbon+and+nitrogen+forms+in+peat+after+progressive+thermal+oxidation+as+determined+by+solid-state〈+sup〉+13〈/sup〉+C-and〈+sup〉+15〈/sup〉+N-NMR+…%22&btnG=&as_sdt=1%2C5&as_sdtp=
39	http://127.0.0.1:8000/scholar_000b.html	3	Carbon dioxide and methane fluxes in drained tropical peat before and after hydrological restoration	http://www.esajournals.org/doi/abs/10.1890/07-2038.1	J Jauhiainen, S Limin, H Silvennoinen, H Vasander	Ecology	2008	Eco Soc America	Black	Present tropical peat deposits are the outcome of net carbon removal from the atmosphere and form one of the largest terrestrial organic carbon stores on the Earth. Reclamation of pristine tropical peatland areas in Southeast Asia increased strikingly during the last half ...	62	http://127.0.0.1:8000/scholar?q=info:kqUt_9YnX0sJ:scholar.google.com/&output=instlink&hl=en&as_sdt=0,5&scillfp=2886220559614056578&oi=lle		http://scholar.google.co.uk/scholar?hl=en&q=%22Carbon+dioxide+and+methane+fluxes+in+drained+tropical+peat+before+and+after+hydrological+restoration%22&btnG=&as_sdt=1%2C5&as_sdtp=
40	http://127.0.0.1:8000/scholar_000b.html	3	Different temperature optima for methane formation when enrichments from acid peat are supplemented with acetate or hydrogen	http://aem.asm.org/content/48/2/389.short	BH Svensson	Applied and environmental microbiology	1984	Am Soc Microbiol	Black	ABSTRACT Laboratory studies of methane formation in peat samples from an acid subarctic mire in Sweden indicated the presence of a low-temperature-adapted methanogenic flora. Enrichment culture studies with ethanol, acetate, hydrogen, or a combination of these as ...	120	http://aem.asm.org/content/48/2/389.full.pdf		http://scholar.google.co.uk/scholar?hl=en&q=%22Different+temperature+optima+for+methane+formation+when+enrichments+from+acid+peat+are+supplemented+with+acetate+or+hydrogen%22&btnG=&as_sdt=1%2C5&as_sdtp=
41	http://127.0.0.1:8000/scholar_000b.html	3	Cold season CH4 and CO2 emission from boreal peat bogs (West Siberia): Winter fluxes and thaw activation dynamics	http://onlinelibrary.wiley.com/doi/10.1029/1999GB900097/full	NS Panikov, SN Dedysh	Global Biogeochemical Cycles	2000	Wiley Online Library	Black	Abstract. The conventional chamber technique was used to measure CH4 and GO 2 emission to the atmosphere from snow-covered ombrotrophic bogs (57øN, 82øE, Plotnikovo, West Siberia). The average+ standard deviation values for CH4 and CO2 fluxes in mid- ...	149	http://onlinelibrary.wiley.com/doi/10.1029/1999GB900097/pdf		http://scholar.google.co.uk/scholar?hl=en&q=%22Cold+season+CH4+and+CO2+emission+from+boreal+peat+bogs+(West+Siberia):+Winter+fluxes+and+thaw+activation+dynamics%22&btnG=&as_sdt=1%2C5&as_sdtp=
42	http://127.0.0.1:8000/scholar_000b.html	3	Estimating carbon accumulation rates of undrained mires in Finland–application to boreal and subarctic regions	http://hol.sagepub.com/content/12/1/69.short	J Turunen, E Tomppo, K Tolonen , A Reinikainen	The Holocene	2002		Black	... The cumulative dry mass of peat was converted into carbon, based on 50% C in peat. The age of basal peat is based mainly on 14C dates determined by the Dating Laboratory of the University of Helsinki. ... For carbon accumulation of peat, function (5) was found to be suitable: ...	420	http://127.0.0.1:8000/scholar?q=info:QRGf0B7ToEoJ:scholar.google.com/&output=instlink&hl=en&as_sdt=0,5&scillfp=4802018719235298528&oi=lle		http://scholar.google.co.uk/scholar?hl=en&q=%22Estimating+carbon+accumulation+rates+of+undrained+mires+in+Finland–application+to+boreal+and+subarctic+regions%22&btnG=&as_sdt=1%2C5&as_sdtp=
43	http://127.0.0.1:8000/scholar_000b.html	3	Some key uncertainties in the global distribution of soil and peat carbon		JM Adams, E Lioubimtseva	… for Carbon …,CRC Press Lewis Publishers	2002		Conference		8		[CITATION]	http://scholar.google.co.uk/scholar?hl=en&q=%22Some+key+uncertainties+in+the+global+distribution+of+soil+and+peat+carbon%22&btnG=&as_sdt=1%2C5&as_sdtp=
44	http://127.0.0.1:8000/scholar_000b.html	3	Acetoclastic and hydrogenotrophic methane production and methanogenic populations in an acidic West‐Siberian peat bog	http://onlinelibrary.wiley.com/doi/10.1111/j.1462-2920.2004.00634.x/full	OR Kotsyurbenko, KJ Chin, MV Glagolev…	Environmental …	2004	Wiley Online Library	Black	Summary Sites in the West Siberian peat bog 'Bakchar'were acidic (pH 4.2–4.8), low in nutrients, and emitted CH 4 at rates of 0.2–1.5 mmol m− 2 h− 1. The vertical profile of δ 13 CH 4 and δ 13 CO 2 dissolved in the porewater indicated increasing isotope fractionation ...	153	http://127.0.0.1:8000/scholar?q=info:QIsMaFcy0GwJ:scholar.google.com/&output=instlink&hl=en&as_sdt=0,5&scillfp=6856284550086577513&oi=lle		http://scholar.google.co.uk/scholar?hl=en&q=%22Acetoclastic+and+hydrogenotrophic+methane+production+and+methanogenic+populations+in+an+acidic+West‐Siberian+peat+bog%22&btnG=&as_sdt=1%2C5&as_sdtp=
45	http://127.0.0.1:8000/scholar_000b.html	3	Microbial carbon mineralisation in an acid surface peat : effects of environmental factors in laboratory incubations	http://www.sciencedirect.com/science/article/pii/S0038071799001170	I Bergman, P Lundberg , M Nilsson	Soil Biology and Biochemistry	1999	Elsevier	Black	The regulation of terminal carbon mineralisation in an acid surface peat dominated by Sphagnum majus, from a boreal mire was studied in laboratory incubations. A factorial design at two levels were used, with the factors and settings in two different experiments ...	68	http://127.0.0.1:8000/scholar?q=info:rOdxpt9WZ4gJ:scholar.google.com/&output=instlink&hl=en&as_sdt=0,5&scillfp=9191848277263230832&oi=lle		http://scholar.google.co.uk/scholar?hl=en&q=%22Microbial+carbon+mineralisation+in+an+acid+surface+peat+:+effects+of+environmental+factors+in+laboratory+incubations%22&btnG=&as_sdt=1%2C5&as_sdtp=
46	http://127.0.0.1:8000/scholar_000b.html	3	Predicting the future DOC flux from upland peat catchments	http://www.sciencedirect.com/science/article/pii/S0022169404002896	F Worrall, T Burt	Journal of Hydrology	2005	Elsevier	Black	This study reconstructs a long-term record of dissolved organic carbon (DOC) flux release from an upland peat catchment in Northern England in order to construct a model of future DOC flux. A structural modelling approach is used to develop models for DOC production ...	86	http://127.0.0.1:8000/scholar?q=info:2Gv2mzu5V4EJ:scholar.google.com/&output=instlink&hl=en&as_sdt=0,5&scillfp=14744728813233236629&oi=lle		http://scholar.google.co.uk/scholar?hl=en&q=%22Predicting+the+future+DOC+flux+from+upland+peat+catchments%22&btnG=&as_sdt=1%2C5&as_sdtp=
47	http://127.0.0.1:8000/scholar_000b.html	3	Role of wetland plants in the diurnal control of CH〈 sub〉 4〈/sub〉 and CO〈 sub〉 2〈/sub〉 fluxes in peat	http://www.sciencedirect.com/science/article/pii/0038071795001034	KL Thomas, J Benstead, KL Davies, D Lloyd	Soil Biology and …	1996	Elsevier	Black	... and Bohlin, 1993; M. Nilsson, E. Bohlin; Methane and carbon dioxide concentrations in bogs and fens—with special reference to the effects of the botanical composition of the peat. Journal of Ecology, 81 (1993), pp. 615–625. ...	170	http://127.0.0.1:8000/scholar?q=info:qcS6vDcvb3UJ:scholar.google.com/&output=instlink&hl=en&as_sdt=0,5&scillfp=1972105940030474282&oi=lle		http://scholar.google.co.uk/scholar?hl=en&q=%22Role+of+wetland+plants+in+the+diurnal+control+of+CH〈+sub〉+4〈/sub〉+and+CO〈+sub〉+2〈/sub〉+fluxes+in+peat%22&btnG=&as_sdt=1%2C5&as_sdtp=
48	http://127.0.0.1:8000/scholar_000b.html	3	Winter CO2 , CH4 and N2O fluxes on some natural and drained boreal peatlands	http://link.springer.com/article/10.1007/BF00992977	J Alm , S Saarnio, H Nykänen, J Silvola, P Martikainen	Biogeochemistry	1999	Springer	Black	... an average of 0.01 g CH4-C m -2. Reason for the low CH4 efflux or net oxidation in drained peatlands probably lies in low substrate supply and thus low CH 4 production in the anoxic deep peat layers. ... Carbon dioxide (CO2), methane (CH4) and nitrous oxide (N20) are ...	246	http://127.0.0.1:8000/scholar?q=info:rim_wAOYU6MJ:scholar.google.com/&output=instlink&hl=en&as_sdt=0,5&scillfp=13469419269069722822&oi=lle		http://scholar.google.co.uk/scholar?hl=en&q=%22Winter+CO2+,+CH4+and+N2O+fluxes+on+some+natural+and+drained+boreal+peatlands%22&btnG=&as_sdt=1%2C5&as_sdtp=
49	http://127.0.0.1:8000/scholar_000b.html	3	Northern peatlands: role in the carbon cycle and probable responses to climatic warming	http://www.esajournals.org/doi/abs/10.2307/1941811	E Gorham	Ecological applications	1991	Eco Soc America	Black	... 2010) The role of Sphagnum mosses in the methane cycling of ... 2010) Phosphorus mobilization in rewetted fens: the effect of altered peat properties and ... 2007) NET EMISSIONS OF CH 4 AND CO 2 IN ALASKA: IMPLICATIONS FOR THE REGION'S GREENHOUSE GAS BUDGET ...	2333	http://conservancy.umn.edu/bitstream/125845/1/EA%201991.pdf		http://scholar.google.co.uk/scholar?hl=en&q=%22Northern+peatlands:+role+in+the+carbon+cycle+and+probable+responses+to+climatic+warming%22&btnG=&as_sdt=1%2C5&as_sdtp=
50	http://127.0.0.1:8000/scholar_000b.html	3	Kinetic evaluation of the reactivity of various coal chars for gasification with carbon dioxide in comparison with steam	http://www.osti.gov/scitech/biblio/6507967	S Kasaoka, Y Sakata , C Tong	Int. Chem. Eng.;(United States)	1985	osti.gov	Black	Save searches, create alerts, and export data: Sign In or Create Account. ...	122		[CITATION]	http://scholar.google.co.uk/scholar?hl=en&q=%22Kinetic+evaluation+of+the+reactivity+of+various+coal+chars+for+gasification+with+carbon+dioxide+in+comparison+with+steam%22&btnG=&as_sdt=1%2C5&as_sdtp=
51	http://127.0.0.1:8000/scholar_002.html	4	Methanotrophic symbionts provide carbon for photosynthesis in peat bogs	http://www.nature.com/nature/journal/v436/n7054/abs/nature03802.html	AA Raghoebarsing, AJP Smolders , MC Schmid…	Nature	2005	nature.com	Black	Abstract Wetlands are the largest natural source of atmospheric methane 1, the second most important greenhouse gas 2. Methane flux to the atmosphere depends strongly on the climate 3; however, by far the largest part of the methane formed in wetland ecosystems is ...	211	http://www.nature.com/nature/journal/v436/n7054/full/nature03802.html		http://scholar.google.co.uk/scholar?hl=en&q=%22Methanotrophic+symbionts+provide+carbon+for+photosynthesis+in+peat+bogs%22&btnG=&as_sdt=1%2C5&as_sdtp=
52	http://127.0.0.1:8000/scholar_002.html	4	Emissions of CH4 , N2O and CO2 from a virgin fen and a fen drained for grassland in Finland	http://www.jstor.org/stable/2845930	H Nykanen, J Alm , K Lang, J Silvola…	Journal of …	1995	JSTOR	Black	... Peat soils are commonly drained for cultivation at northern latitudes, and an increase in the mineralization of ... The management of natural soils will obviously alter the greenhouse gas fluxes. ... The total GWP associated with cultivation was estimated to be 2.6 X 104 kg CO2 ha-' yr ...	269			http://scholar.google.co.uk/scholar?hl=en&q=%22Emissions+of+CH4+,+N2O+and+CO2+from+a+virgin+fen+and+a+fen+drained+for+grassland+in+Finland%22&btnG=&as_sdt=1%2C5&as_sdtp=
53	http://127.0.0.1:8000/scholar_002.html	4	Export of dissolved organic carbon from peatlands under elevated carbon dioxide levels	http://www.nature.com/nature/journal/v430/n6996/abs/nature02707.html	C Freeman , N Fenner , NJ Ostle, H Kang , DJ Dowrick…	Nature	2004	nature.com	Black	... elevated carbon dioxide levels, the proportion of dissolved organic carbon derived from recently assimilated carbon dioxide was ten ... Figure 3 : Effects of elevated CO2 on DOC release. ... Intact peat monoliths that had been exposed to elevated CO 2 for nearly 3 years were pulse ...	381	http://www.nature.com/nature/journal/v430/n6996/full/nature02707.html		http://scholar.google.co.uk/scholar?hl=en&q=%22Export+of+dissolved+organic+carbon+from+peatlands+under+elevated+carbon+dioxide+levels%22&btnG=&as_sdt=1%2C5&as_sdtp=
54	http://127.0.0.1:8000/scholar_002.html	4	Methylocella palustris gen. nov., sp. nov., a new methane -oxidizing acidophilic bacterium from peat bogs, representing a novel subtype of serine-pathway …	http://ijs.sgmjournals.org/content/50/3/955.short	SN Dedysh, W Liesack…	… of Systematic and …	2000	Soc General Microbiol	Black	Abstract A new genus, Methylocella, and a new species, Methylocella palustris, are proposed for three strains of methane-oxidizing bacteria isolated from acidic Sphagnum peat bogs. These bacteria are aerobic, Gram-negative, colourless, non-motile, straight ...	274	http://ijs.sgmjournals.org/content/50/3/955.full.pdf?origin=publicationDetail		http://scholar.google.co.uk/scholar?hl=en&q=%22Methylocella+palustris+gen.+nov.,+sp.+nov.,+a+new+methane+-oxidizing+acidophilic+bacterium+from+peat+bogs,+representing+a+novel+subtype+of+serine-pathway+…%22&btnG=&as_sdt=1%2C5&as_sdtp=
55	http://127.0.0.1:8000/scholar_002.html	4	Soil organic carbon pools in the northern circumpolar permafrost region	http://onlinelibrary.wiley.com/doi/10.1029/2008GB003327/full	C Tarnocai, JG Canadell , EAG Schuur …	Global …	2009	Wiley Online Library	Black	... Isolated patches, 12.6, 30.6, 16.4, 36.5, 67.1. Total, 66.9, 164.7, 124.4, 331.1, 495.8. Table 7. Soil Organic Carbon Mass for the Total Depth of the Peat Deposits in North America and Eurasia. Permafrost Zones, SOCM a (Pg). Canada b, Alaska c, North America, Eurasia, Total. a ...	678	http://onlinelibrary.wiley.com/doi/10.1029/2008GB003327/full	[HTML]	http://scholar.google.co.uk/scholar?hl=en&q=%22Soil+organic+carbon+pools+in+the+northern+circumpolar+permafrost+region%22&btnG=&as_sdt=1%2C5&as_sdtp=
56	http://127.0.0.1:8000/scholar_002.html	4	Can climate change explain increases in DOC flux from upland peat catchments?	http://www.sciencedirect.com/science/article/pii/S0048969703006764	F Worrall, T Burt, J Adamson	Science of the Total Environment	2004	Elsevier	Black	Long-term increases in DOC concentration in rivers draining areas of upland peat are a ubiquitous phenomenon in the UK. Several hypotheses have been proposed to explain these increases, but one compelling explanation is the observed long-term increase in ...	138			http://scholar.google.co.uk/scholar?hl=en&q=%22Can+climate+change+explain+increases+in+DOC+flux+from+upland+peat+catchments?%22&btnG=&as_sdt=1%2C5&as_sdtp=
57	http://127.0.0.1:8000/scholar_002.html	4	Atmospheric nitrogen deposition promotes carbon loss from peat bogs	http://www.pnas.org/content/103/51/19386.short	L Bragazza, C Freeman , T Jones …	Proceedings of the …	2006	National Acad Sciences	Black	Abstract Peat bogs have historically represented exceptional carbon (C) sinks because of their extremely low decomposition rates and consequent accumulation of plant remnants as peat. Among the factors favoring that peat accumulation, a major role is played by the ...	185	http://www.pnas.org/content/103/51/19386.full		http://scholar.google.co.uk/scholar?hl=en&q=%22Atmospheric+nitrogen+deposition+promotes+carbon+loss+from+peat+bogs%22&btnG=&as_sdt=1%2C5&as_sdtp=
58	http://127.0.0.1:8000/scholar_002.html	4	Production of methane and carbon dioxide in peatland ecosystems across North America: effects of temperature, aeration, and organic chemistry of peat	http://www.tandfonline.com/doi/abs/10.1080/01490459709378054	JB Yavitt , CJ Williams , RK Wieder	Geomicrobiology Journal	1997		Black	Peat soil from 12 northern peatlands, spanning broad gradients in mean annual temperature (MAT), mean annual precipitation (MAP), and plant species composition, was incubated in vitro at differing temperature (2, 12, 22° C), aeration (anoxic, oxic), and with or without ...	96	https://edisk.fandm.edu/chris.williams/pubs/yavitt_etal_1997.pdf		http://scholar.google.co.uk/scholar?hl=en&q=%22Production+of+methane+and+carbon+dioxide+in+peatland+ecosystems+across+North+America:+effects+of+temperature,+aeration,+and+organic+chemistry+of+peat%22&btnG=&as_sdt=1%2C5&as_sdtp=
59	http://127.0.0.1:8000/scholar_002.html	4	Carbon dioxide -acceptor (coal) gasification process. Studies of acceptor properties.[Process discussed in light of required properties of CaO acceptor; …	http://www.osti.gov/scitech/biblio/5309289	GP Curran, CE Fink, E Gorin	Adv. Chem. Ser.	1967	osti.gov	Black	Save searches, create alerts, and export data: Sign In or Create Account. ...	204		[CITATION]	http://scholar.google.co.uk/scholar?hl=en&q=%22Carbon+dioxide+-acceptor+(coal)+gasification+process.+Studies+of+acceptor+properties.[Process+discussed+in+light+of+required+properties+of+CaO+acceptor;+…%22&btnG=&as_sdt=1%2C5&as_sdtp=
60	http://127.0.0.1:8000/scholar_002.html	4	Fossil carbon /nitrogen ratios as a measure of peat decomposition	http://www.jstor.org/stable/2265676	P Kuhry, DH Vitt	Ecology	1996	JSTOR	Black	Net accumulation rates of carbon in a 9000 calendar year record of Sphagnum fuscum peat in western boreal Canada range from 13.6 to 34.9 gm-2. yr-1. The depth vs. age curve is slightly convex due to generally declining net productivity at the site. Fossil carbon/ ...	174			http://scholar.google.co.uk/scholar?hl=en&q=%22Fossil+carbon+/nitrogen+ratios+as+a+measure+of+peat+decomposition%22&btnG=&as_sdt=1%2C5&as_sdtp=
61	http://127.0.0.1:8000/scholar_001.html	5	Climate change (communication arising): terrestrial export of organic carbon	http://www.nature.com/nature/journal/v415/n6874/abs/415861b.html	LJ Tranvik , M Jansson	Nature	2002	nature.com	Black	... This is illustrated by the substantial increase in DOC concentrations in lakes and streams in Sweden during the 1970s and 1980s, despite a ... and runoff in these locations 5, 6 , which are typical of the northern boreal region where a large proportion of global peat carbon is stored. ...	214	http://www.nature.com/nature/journal/v415/n6874/full/415861b.html		http://scholar.google.co.uk/scholar?hl=en&q=%22Climate+change+(communication+arising):+terrestrial+export+of+organic+carbon%22&btnG=&as_sdt=1%2C5&as_sdtp=
62	http://127.0.0.1:8000/scholar_001.html	5	… and Holocene carbon accumulation and climate change from an equatorial peat bog (Kalimantan, Indonesia): implications for past, present and future carbon …	http://onlinelibrary.wiley.com/doi/10.1002/jqs.884/full	SE Page , RAJ Wűst, D Weiss , JO Rieley…	Journal of …	2004	Wiley Online Library	Black	Abstract A 9.5 m core from an inland peatland in Kalimantan, Indonesia, reveals organic matter accumulation started around 26 000 cal. yr BP, providing the oldest reported initiation date for lowland ombrotrophic peat formation in SE Asia. The core shows clear evidence ...	131			http://scholar.google.co.uk/scholar?hl=en&q=%22…+and+Holocene+carbon+accumulation+and+climate+change+from+an+equatorial+peat+bog+(Kalimantan,+Indonesia):+implications+for+past,+present+and+future+carbon+…%22&btnG=&as_sdt=1%2C5&as_sdtp=
63	http://127.0.0.1:8000/scholar_001.html	5	Hydrogenotrophic methanogenesis by moderately acid-tolerant methanogens of a methane -emitting acidic peat	http://aem.asm.org/content/69/1/74.short	MA Horn, C Matthies, K Küsel…	Applied and …	2003	Am Soc Microbiol	Black	ABSTRACT The emission of methane (1.3 mmol of CH 4 m− 2 day− 1), precursors of methanogenesis, and the methanogenic microorganisms of acidic bog peat (pH 4.4) from a moderately reduced forest site were investigated by in situ measurements, microcosm ...	172	http://aem.asm.org/content/69/1/74.full		http://scholar.google.co.uk/scholar?hl=en&q=%22Hydrogenotrophic+methanogenesis+by+moderately+acid-tolerant+methanogens+of+a+methane+-emitting+acidic+peat%22&btnG=&as_sdt=1%2C5&as_sdtp=
64	http://127.0.0.1:8000/scholar_001.html	5	Amplified carbon release from vast West Siberian peatlands by 2100	http://onlinelibrary.wiley.com/doi/10.1029/2004GL022025/full	KE Frey, LC Smith	Geophysical Research Letters	2005	Wiley Online Library	Black	... Both the A2 (less conservative) and B2 (more conservative) IPCC greenhouse gas emission scenarios are ... (1993), Recent change of Arctic tundra ecosystems from a net carbon dioxide sink to ... A high resolution GIS-based inventory of the West Siberian peat carbon pool, Global ...	166	http://onlinelibrary.wiley.com/doi/10.1029/2004GL022025/full	[HTML]	http://scholar.google.co.uk/scholar?hl=en&q=%22Amplified+carbon+release+from+vast+West+Siberian+peatlands+by+2100%22&btnG=&as_sdt=1%2C5&as_sdtp=
65	http://127.0.0.1:8000/scholar_001.html	5	Potential carbon losses from peat profiles: effects of temperature, drought cycles, and fire	http://www.jstor.org/stable/1941863	EH Hogg , VJ Lieffers, RW Wein	Ecological Applications	1992	JSTOR	Black	Global warming and the resultant increase in evapotranspiration might lead to lowered water tables in peatlands and an increase in fire frequency. The objective of this study was to investigate some of the potential effects of these changes on peat decomposition. Dry ...	150			http://scholar.google.co.uk/scholar?hl=en&q=%22Potential+carbon+losses+from+peat+profiles:+effects+of+temperature,+drought+cycles,+and+fire%22&btnG=&as_sdt=1%2C5&as_sdtp=
66	http://127.0.0.1:8000/scholar_001.html	5	Carbon dioxide balance of a tropical peat swamp forest in Kalimantan, Indonesia	http://onlinelibrary.wiley.com/doi/10.1111/j.1365-2486.2006.01301.x/full	T Hirano, H Segah , T Harada, S Limin…	Global Change …	2007	Wiley Online Library	Black	Abstract Tropical peatlands, which coexist with swamp forests, have accumulated vast amounts of carbon as soil organic matter. Since the 1970s, however, deforestation and drainage have progressed on an enormous scale. In addition, El Niño and Southern ...	110	http://127.0.0.1:8000/scholar?q=info:STEUR9xNsocJ:scholar.google.com/&output=instlink&hl=en&as_sdt=0,5&scillfp=1200060574411025789&oi=lle		http://scholar.google.co.uk/scholar?hl=en&q=%22Carbon+dioxide+balance+of+a+tropical+peat+swamp+forest+in+Kalimantan,+Indonesia%22&btnG=&as_sdt=1%2C5&as_sdtp=
67	http://127.0.0.1:8000/scholar_001.html	5	Influence of drought‐induced acidification on the mobility of dissolved organic carbon in peat soils	http://onlinelibrary.wiley.com/doi/10.1111/j.1365-2486.2005.00937.x/full	JM Clark , PJ Chapman, JK Adamson…	Global Change …	2005	Wiley Online Library	Black	Abstract A strong relationship between dissolved organic carbon (DOC) and sulphate (SO 4 2−) dynamics under drought conditions has been revealed from analysis of a 10-year time series (1993–2002). Soil solution from a blanket peat at 10 cm depth and stream water ...	163	http://www.researchgate.net/publication/227701990_Influence_of_droughtinduced_acidification_on_the_mobility_of_dissolved_organic_carbon_in_peat_soils/file/5046352b762edec464.pdf		http://scholar.google.co.uk/scholar?hl=en&q=%22Influence+of+drought‐induced+acidification+on+the+mobility+of+dissolved+organic+carbon+in+peat+soils%22&btnG=&as_sdt=1%2C5&as_sdtp=
68	http://127.0.0.1:8000/scholar_001.html	5	Rearrangement of carbon and nitrogen forms in peat after progressive thermal oxidation as determined by solid-state〈 sup〉 13〈/sup〉 C-and〈 sup〉 15〈/sup〉 N-NMR …	http://www.sciencedirect.com/science/article/pii/S0146638003001529	G Almendros, H Knicker , FJ González-Vila	Organic Geochemistry	2003	Elsevier	Black	Peat samples subjected to thermal oxidation were studied by solid-state 13C-and 15N-NMR spectroscopy, so as to gain information on the thermal alteration of organic matter during processes such as natural fires or prescribed fires affecting soils. The 13C-NMR spectra ...	161			http://scholar.google.co.uk/scholar?hl=en&q=%22Rearrangement+of+carbon+and+nitrogen+forms+in+peat+after+progressive+thermal+oxidation+as+determined+by+solid-state〈+sup〉+13〈/sup〉+C-and〈+sup〉+15〈/sup〉+N-NMR+…%22&btnG=&as_sdt=1%2C5&as_sdtp=
69	http://127.0.0.1:8000/scholar_001.html	5	Carbon dioxide and methane fluxes in drained tropical peat before and after hydrological restoration	http://www.esajournals.org/doi/abs/10.1890/07-2038.1	J Jauhiainen, S Limin, H Silvennoinen, H Vasander	Ecology	2008	Eco Soc America	Black	Present tropical peat deposits are the outcome of net carbon removal from the atmosphere and form one of the largest terrestrial organic carbon stores on the Earth. Reclamation of pristine tropical peatland areas in Southeast Asia increased strikingly during the last half ...	62			http://scholar.google.co.uk/scholar?hl=en&q=%22Carbon+dioxide+and+methane+fluxes+in+drained+tropical+peat+before+and+after+hydrological+restoration%22&btnG=&as_sdt=1%2C5&as_sdtp=
70	http://127.0.0.1:8000/scholar_001.html	5	Different temperature optima for methane formation when enrichments from acid peat are supplemented with acetate or hydrogen	http://aem.asm.org/content/48/2/389.short	BH Svensson	Applied and environmental microbiology	1984	Am Soc Microbiol	Black	ABSTRACT Laboratory studies of methane formation in peat samples from an acid subarctic mire in Sweden indicated the presence of a low-temperature-adapted methanogenic flora. Enrichment culture studies with ethanol, acetate, hydrogen, or a combination of these as ...	120	http://aem.asm.org/content/48/2/389.full.pdf		http://scholar.google.co.uk/scholar?hl=en&q=%22Different+temperature+optima+for+methane+formation+when+enrichments+from+acid+peat+are+supplemented+with+acetate+or+hydrogen%22&btnG=&as_sdt=1%2C5&as_sdtp=
71	http://127.0.0.1:8000/scholar_004.html	6	Cold season CH4 and CO2 emission from boreal peat bogs (West Siberia): Winter fluxes and thaw activation dynamics	http://onlinelibrary.wiley.com/doi/10.1029/1999GB900097/full	NS Panikov, SN Dedysh	Global Biogeochemical Cycles	2000	Wiley Online Library	Black	Abstract. The conventional chamber technique was used to measure CH4 and GO 2 emission to the atmosphere from snow-covered ombrotrophic bogs (57øN, 82øE, Plotnikovo, West Siberia). The average+ standard deviation values for CH4 and CO2 fluxes in mid- ...	149	http://onlinelibrary.wiley.com/doi/10.1029/1999GB900097/pdf		http://scholar.google.co.uk/scholar?hl=en&q=%22Cold+season+CH4+and+CO2+emission+from+boreal+peat+bogs+(West+Siberia):+Winter+fluxes+and+thaw+activation+dynamics%22&btnG=&as_sdt=1%2C5&as_sdtp=
72	http://127.0.0.1:8000/scholar_004.html	6	Estimating carbon accumulation rates of undrained mires in Finland–application to boreal and subarctic regions	http://hol.sagepub.com/content/12/1/69.short	J Turunen, E Tomppo, K Tolonen , A Reinikainen	The Holocene	2002		Black	... The cumulative dry mass of peat was converted into carbon, based on 50% C in peat. The age of basal peat is based mainly on 14C dates determined by the Dating Laboratory of the University of Helsinki. ... For carbon accumulation of peat, function (5) was found to be suitable: ...	420	http://127.0.0.1:8000/scholar?q=info:QRGf0B7ToEoJ:scholar.google.com/&output=instlink&hl=en&as_sdt=0,5&scillfp=17000492768684604346&oi=lle		http://scholar.google.co.uk/scholar?hl=en&q=%22Estimating+carbon+accumulation+rates+of+undrained+mires+in+Finland–application+to+boreal+and+subarctic+regions%22&btnG=&as_sdt=1%2C5&as_sdtp=
73	http://127.0.0.1:8000/scholar_004.html	6	Some key uncertainties in the global distribution of soil and peat carbon		JM Adams, E Lioubimtseva	… for Carbon …,CRC Press Lewis Publishers	2002		Conference		8		[CITATION]	http://scholar.google.co.uk/scholar?hl=en&q=%22Some+key+uncertainties+in+the+global+distribution+of+soil+and+peat+carbon%22&btnG=&as_sdt=1%2C5&as_sdtp=
74	http://127.0.0.1:8000/scholar_004.html	6	Acetoclastic and hydrogenotrophic methane production and methanogenic populations in an acidic West‐Siberian peat bog	http://onlinelibrary.wiley.com/doi/10.1111/j.1462-2920.2004.00634.x/full	OR Kotsyurbenko, KJ Chin, MV Glagolev…	Environmental …	2004	Wiley Online Library	Black	Summary Sites in the West Siberian peat bog 'Bakchar'were acidic (pH 4.2–4.8), low in nutrients, and emitted CH 4 at rates of 0.2–1.5 mmol m− 2 h− 1. The vertical profile of δ 13 CH 4 and δ 13 CO 2 dissolved in the porewater indicated increasing isotope fractionation ...	153			http://scholar.google.co.uk/scholar?hl=en&q=%22Acetoclastic+and+hydrogenotrophic+methane+production+and+methanogenic+populations+in+an+acidic+West‐Siberian+peat+bog%22&btnG=&as_sdt=1%2C5&as_sdtp=
75	http://127.0.0.1:8000/scholar_004.html	6	Microbial carbon mineralisation in an acid surface peat : effects of environmental factors in laboratory incubations	http://www.sciencedirect.com/science/article/pii/S0038071799001170	I Bergman, P Lundberg , M Nilsson	Soil Biology and Biochemistry	1999	Elsevier	Black	The regulation of terminal carbon mineralisation in an acid surface peat dominated by Sphagnum majus, from a boreal mire was studied in laboratory incubations. A factorial design at two levels were used, with the factors and settings in two different experiments ...	68			http://scholar.google.co.uk/scholar?hl=en&q=%22Microbial+carbon+mineralisation+in+an+acid+surface+peat+:+effects+of+environmental+factors+in+laboratory+incubations%22&btnG=&as_sdt=1%2C5&as_sdtp=
76	http://127.0.0.1:8000/scholar_004.html	6	Predicting the future DOC flux from upland peat catchments	http://www.sciencedirect.com/science/article/pii/S0022169404002896	F Worrall, T Burt	Journal of Hydrology	2005	Elsevier	Black	This study reconstructs a long-term record of dissolved organic carbon (DOC) flux release from an upland peat catchment in Northern England in order to construct a model of future DOC flux. A structural modelling approach is used to develop models for DOC production ...	86			http://scholar.google.co.uk/scholar?hl=en&q=%22Predicting+the+future+DOC+flux+from+upland+peat+catchments%22&btnG=&as_sdt=1%2C5&as_sdtp=
77	http://127.0.0.1:8000/scholar_004.html	6	Role of wetland plants in the diurnal control of CH〈 sub〉 4〈/sub〉 and CO〈 sub〉 2〈/sub〉 fluxes in peat	http://www.sciencedirect.com/science/article/pii/0038071795001034	KL Thomas, J Benstead, KL Davies, D Lloyd	Soil Biology and …	1996	Elsevier	Black	... and Bohlin, 1993; M. Nilsson, E. Bohlin; Methane and carbon dioxide concentrations in bogs and fens—with special reference to the effects of the botanical composition of the peat. Journal of Ecology, 81 (1993), pp. 615–625. ...	170			http://scholar.google.co.uk/scholar?hl=en&q=%22Role+of+wetland+plants+in+the+diurnal+control+of+CH〈+sub〉+4〈/sub〉+and+CO〈+sub〉+2〈/sub〉+fluxes+in+peat%22&btnG=&as_sdt=1%2C5&as_sdtp=
78	http://127.0.0.1:8000/scholar_004.html	6	Winter CO2 , CH4 and N2O fluxes on some natural and drained boreal peatlands	http://link.springer.com/article/10.1007/BF00992977	J Alm , S Saarnio, H Nykänen, J Silvola, P Martikainen	Biogeochemistry	1999	Springer	Black	... an average of 0.01 g CH4-C m -2. Reason for the low CH4 efflux or net oxidation in drained peatlands probably lies in low substrate supply and thus low CH 4 production in the anoxic deep peat layers. ... Carbon dioxide (CO2), methane (CH4) and nitrous oxide (N20) are ...	246			http://scholar.google.co.uk/scholar?hl=en&q=%22Winter+CO2+,+CH4+and+N2O+fluxes+on+some+natural+and+drained+boreal+peatlands%22&btnG=&as_sdt=1%2C5&as_sdtp=
79	http://127.0.0.1:8000/scholar_004.html	6	Northern peatlands: role in the carbon cycle and probable responses to climatic warming	http://www.esajournals.org/doi/abs/10.2307/1941811	E Gorham	Ecological applications	1991	Eco Soc America	Black	... 2010) The role of Sphagnum mosses in the methane cycling of ... 2010) Phosphorus mobilization in rewetted fens: the effect of altered peat properties and ... 2007) NET EMISSIONS OF CH 4 AND CO 2 IN ALASKA: IMPLICATIONS FOR THE REGION'S GREENHOUSE GAS BUDGET ...	2333	http://conservancy.umn.edu/bitstream/125845/1/EA%201991.pdf		http://scholar.google.co.uk/scholar?hl=en&q=%22Northern+peatlands:+role+in+the+carbon+cycle+and+probable+responses+to+climatic+warming%22&btnG=&as_sdt=1%2C5&as_sdtp=
80	http://127.0.0.1:8000/scholar_004.html	6	Kinetic evaluation of the reactivity of various coal chars for gasification with carbon dioxide in comparison with steam	http://www.osti.gov/scitech/biblio/6507967	S Kasaoka, Y Sakata , C Tong	Int. Chem. Eng.;(United States)	1985	osti.gov	Black	Save searches, create alerts, and export data: Sign In or Create Account. ...	122		[CITATION]	http://scholar.google.co.uk/scholar?hl=en&q=%22Kinetic+evaluation+of+the+reactivity+of+various+coal+chars+for+gasification+with+carbon+dioxide+in+comparison+with+steam%22&btnG=&as_sdt=1%2C5&as_sdtp=
81	http://127.0.0.1:8000/scholar_006.html	7	Alternative explanations for rising dissolved organic carbon export from organic soils	http://onlinelibrary.wiley.com/doi/10.1111/j.1365-2486.2006.01241.x/full	CD Evans , PJ Chapman, JM Clark …	Global change …	2006	Wiley Online Library	Black	... image Figure 5. Example of a summer drought-induced sulphate flush causing acidification and suppression of dissolved organic carbon (DOC) in peat soil solution, Moor House (Northern England). Bold lines show observed chemistry during the 1999 drought year. ...	293	http://127.0.0.1:8000/scholar?q=info:8SAzNuwNKf0J:scholar.google.com/&output=instlink&hl=en&as_sdt=0,5&scillfp=15721992567170475265&oi=lle		http://scholar.google.co.uk/scholar?hl=en&q=%22Alternative+explanations+for+rising+dissolved+organic+carbon+export+from+organic+soils%22&btnG=&as_sdt=1%2C5&as_sdtp=
82	http://127.0.0.1:8000/scholar_006.html	7	Isolation of acidophilic methane -oxidizing bacteria from northern peat wetlands	http://www.sciencemag.org/content/282/5387/281.short	SN Dedysh, NS Panikov, W Liesack, R Großkopf…	Science	1998	sciencemag.org	Black	Abstract Acidic northern wetlands are an important source of methane, one of the gases that contributes to global warming. Methane oxidation in the surface of these acidic wetlands can reduce the methane flux to the atmosphere up to 90 percent. Here the isolation of three ...	118	http://ieg.ou.edu/publication/PDF/Isolation%20of%20acidophilic%20methane-oxidizing%20bacteria%20from%20northern%20peat%20wetlands.pdf		http://scholar.google.co.uk/scholar?hl=en&q=%22Isolation+of+acidophilic+methane+-oxidizing+bacteria+from+northern+peat+wetlands%22&btnG=&as_sdt=1%2C5&as_sdtp=
83	http://127.0.0.1:8000/scholar_006.html	7	Diffusion and mass flow of dissolved carbon dioxide , methane , and dissolved organic carbon in a 7-m deep raised peat bog	http://www.sciencedirect.com/science/article/pii/S0016703708000835	RS Clymo , CL Bryant	Geochimica et Cosmochimica Acta	2008	Elsevier	Black	In 65 samples, we got values (unusually replicable and consistent for this type of work) of concentration, 14C/13C (AMS) age, and δ13C for: peat, dissolved organic carbon (DOC), peat fractions, and dissolved CO2 and CH4 at 50-cm intervals down to 700cm in ...	61			http://scholar.google.co.uk/scholar?hl=en&q=%22Diffusion+and+mass+flow+of+dissolved+carbon+dioxide+,+methane+,+and+dissolved+organic+carbon+in+a+7-m+deep+raised+peat+bog%22&btnG=&as_sdt=1%2C5&as_sdtp=
84	http://127.0.0.1:8000/scholar_006.html	7	Carbon sequestration in the agricultural soils of Europe	http://www.sciencedirect.com/science/article/pii/S0016706104000254	A Freibauer, MDA Rounsevell, P Smith , J Verhagen	Geoderma	2004	Elsevier	Black	... Potential alternative uses of agricultural peat soils include the avoidance of potatoes and sugar beet, avoidance of ... factor, Soil carbon sequestration potential (Mt C year −1 ) given limitation, Soil carbon sequestration potential (Mt ... GHG: Greenhouse gas reduction in C-equivalents. ...	550			http://scholar.google.co.uk/scholar?hl=en&q=%22Carbon+sequestration+in+the+agricultural+soils+of+Europe%22&btnG=&as_sdt=1%2C5&as_sdtp=
85	http://127.0.0.1:8000/scholar_006.html	7	Carbon sequestration in western Canadian peat highly sensitive to Holocene wet-dry climate cycles at millennial timescales	http://hol.sagepub.com/content/13/6/801.short	Z Yu, ID Campbell , C Campbell , DH Vitt, GC Bond…	The …	2003		Black	Abstract A high-resolution fen peat record and 79 basal peat dates from paludified peatlands in continental western Canada provide evidence for cyclic change in moisture conditions and in peat carbon accumulation. The ash-free bulk density, a proxy for degree of peat ...	57	http://www.lehigh.edu/~ziy2/pubs/Yu2003HoloceneProofs.pdf		http://scholar.google.co.uk/scholar?hl=en&q=%22Carbon+sequestration+in+western+Canadian+peat+highly+sensitive+to+Holocene+wet-dry+climate+cycles+at+millennial+timescales%22&btnG=&as_sdt=1%2C5&as_sdtp=
86	http://127.0.0.1:8000/scholar_006.html	7	Carbon dioxide and methane fluxes from drained peat soils, southern Quebec	http://onlinelibrary.wiley.com/doi/10.1029/93GB00469/full	S Glenn, A Heyes, T Moore	Global Biogeochemical Cycles	1993	Wiley Online Library	Black	Abstract. Fluxes of CO 2 and CH 4 were determined by a static chamber technique at eight drained swamp peatland sites, with crop and forest covers. Over a 6-month period(May- October, 1991), CH4 fluxes ranged from-5 to 7 mg CH• m'2 d'• and were not correlated ...	106			http://scholar.google.co.uk/scholar?hl=en&q=%22Carbon+dioxide+and+methane+fluxes+from+drained+peat+soils,+southern+Quebec%22&btnG=&as_sdt=1%2C5&as_sdtp=
87	http://127.0.0.1:8000/scholar_006.html	7	Methane production in contrasting wetland sites: Response to organic‐chemical components of peat and to sulfate reduction	http://www.tandfonline.com/doi/abs/10.1080/01490459009377876	JB Yavitt , GE Lang	Geomicrobiology Journal	1990		Black	Abstract We used methane‐production measurements of slurried peat to study controls of methane production in six contrasting Appalachian wetland sites. The sites differed widely in plant‐community composition and in rates of methane production, which varied from 3 ...	106			http://scholar.google.co.uk/scholar?hl=en&q=%22Methane+production+in+contrasting+wetland+sites:+Response+to+organic‐chemical+components+of+peat+and+to+sulfate+reduction%22&btnG=&as_sdt=1%2C5&as_sdtp=
88	http://127.0.0.1:8000/scholar_006.html	7	The spectrophotometric determination of dissolved organic carbon in peat waters	https://dl.sciencesocieties.org/publications/sssaj/abstracts/49/6/SS0490061590	TR Moore	Soil Science Society of America Journal	1985		Black	Abstract Based on spectra of peat water samples representing a range of geochemical origin from minerotrophic fens to ombrotrophic bogs, dissolved organic carbon (DOC) was only weakly predicted (r 2= 0.710) by absorbance at 330 nm. Differences in molecular ...	79			http://scholar.google.co.uk/scholar?hl=en&q=%22The+spectrophotometric+determination+of+dissolved+organic+carbon+in+peat+waters%22&btnG=&as_sdt=1%2C5&as_sdtp=
89	http://127.0.0.1:8000/scholar_006.html	7	Fluxes of N2O from farmed peat soils in Finland	http://onlinelibrary.wiley.com/doi/10.1111/j.1365-2389.2004.00622.x/full	K Regina, E Syväsalo, A Hannukkala…	European Journal of …	2004	Wiley Online Library	Black	Summary Agricultural peat soils are important sources of nitrous oxide (N 2 O). Emissions of N 2 O were measured from field plots of grass, barley, potatoes and fallow on a peat field in northern Finland during 2000–2002 and in southern Finland in 1999–2002. In the north ...	104			http://scholar.google.co.uk/scholar?hl=en&q=%22Fluxes+of+N2O+from+farmed+peat+soils+in+Finland%22&btnG=&as_sdt=1%2C5&as_sdtp=
90	http://127.0.0.1:8000/scholar_006.html	7	Potential methane production and methane oxidation rates in peatland ecosystems of the Appalachian Mountains, United States	http://adsabs.harvard.edu/abs/1988GBioC...2..253Y	JB Yavitt , GE Lang, DM Downey	Global Biogeochemical …	1988		Black	... Bibliographic Code: 1988GBioC...2..253Y. Abstract. Potential rates of methane production and carbon dioxide production were measured on 11 dates in 1986 in peat from six plant communities typical of moss-dominated peatlands in the Appalachian Mountains. ...	123			http://scholar.google.co.uk/scholar?hl=en&q=%22Potential+methane+production+and+methane+oxidation+rates+in+peatland+ecosystems+of+the+Appalachian+Mountains,+United+States%22&btnG=&as_sdt=1%2C5&as_sdtp=
91	http://127.0.0.1:8000/scholar_005.html	8	PEAT - CO2 , Assessment of CO2 emissions from drained peatlands in SE Asia, Delft Hydraulics report Q3943/2006, 36p		A Hooijer , M Silvius, H Wosten, S Page			2006	Grey		7		[CITATION]	http://scholar.google.co.uk/scholar?hl=en&q=%22PEAT+-+CO2+,+Assessment+of+CO2+emissions+from+drained+peatlands+in+SE+Asia,+Delft+Hydraulics+report+Q3943/2006,+36p%22&btnG=&as_sdt=1%2C5&as_sdtp=
92	http://127.0.0.1:8000/scholar_005.html	8	Carbon sequestration in peatland: patterns and mechanisms of response to climate change	http://onlinelibrary.wiley.com/doi/10.1111/j.1529-8817.2003.00783.x/full	LR Belyea , N Malmer	Global Change Biology	2004	Wiley Online Library	Black	... Compared with most other ecosystems, peatlands globally are a small sink for carbon dioxide (CO 2 ) (Gorham ... Clymo et al., 1998; Turunen et al., 2002), a large source of methane (CH 4 ... Cubasch et al., 2001) through expansion of flarks or hollows, inhibiting peat formation and ...	179	http://lup.lub.lu.se/record/137465/file/624661.pdf		http://scholar.google.co.uk/scholar?hl=en&q=%22Carbon+sequestration+in+peatland:+patterns+and+mechanisms+of+response+to+climate+change%22&btnG=&as_sdt=1%2C5&as_sdtp=
93	http://127.0.0.1:8000/scholar_005.html	8	Concentrations and fluxes of dissolved organic carbon in drainage water from an upland peat system	http://www.sciencedirect.com/science/article/pii/S0160412098000439	MJ Scott, MN Jones, C Woof, E Tipping	Environment International	1998	Elsevier	Black	Measurements were made of the concentrations of total and hydrophilic dissolved organic carbon (DOC) and optical absorbance at 340 nm (A340) in two pools (X and Y) situated in an area of peat on Great Dun Fell, North Pennines, UK, between November 1992 and ...	107			http://scholar.google.co.uk/scholar?hl=en&q=%22Concentrations+and+fluxes+of+dissolved+organic+carbon+in+drainage+water+from+an+upland+peat+system%22&btnG=&as_sdt=1%2C5&as_sdtp=
94	http://127.0.0.1:8000/scholar_005.html	8	Peat accumulation in northern wetlands	http://www.sciencedirect.com/science/article/pii/003358949090063Q	L Ovenden	Quaternary Research	1990	Elsevier	Black	... for atmospheric carbon dioxide in a changing environment? Oecologia, 53 (1982), pp. 7–11. ... Blake, 1985; W. Blake Jr. Geological Survey of Canada Radiocarbon Dates, XXV (1985) Geological Survey of Canada, Paper 85-7. Clymo, 1984; RS Clymo; The limits to peat bog growth ...	102			http://scholar.google.co.uk/scholar?hl=en&q=%22Peat+accumulation+in+northern+wetlands%22&btnG=&as_sdt=1%2C5&as_sdtp=
95	http://127.0.0.1:8000/scholar_005.html	8	Carbon dioxide and methane production potentials of peats from natural, harvested and restored sites, Eastern Québec, Canada	http://link.springer.com/article/10.1672/0277-5212(2004)024%5B0261:CDAMPP%5D2.0.CO%3B2	S Glatzel , N Basiliko , T Moore	Wetlands	2004	Springer	Black	... Ecology 79:1545–1561. Cleary, J. 2003. Greenhouse gas emissions from peat extraction in Canada: a life cycle perspective. ... Jasinski, SM 1999. Peat. Minerals Yearbook 1999:Volume 1-Met- als and Minerals. ... Page 7. Glatzel et al., CO2 AND CH4 PRODUCTION POTENTIALS ...	85	http://geog.mcgill.ca/faculty/moore/Wetlands_24_261.pdf		http://scholar.google.co.uk/scholar?hl=en&q=%22Carbon+dioxide+and+methane+production+potentials+of+peats+from+natural,+harvested+and+restored+sites,+Eastern+Québec,+Canada%22&btnG=&as_sdt=1%2C5&as_sdtp=
96	http://127.0.0.1:8000/scholar_005.html	8	Determination of the amount of carbon stored in Indonesian peatlands	http://www.sciencedirect.com/science/article/pii/S0016706108002309	J Jaenicke, JO Rieley, C Mott, P Kimman, F Siegert	Geoderma	2008	Elsevier	Black	... Hooijer et al., 2006; A. Hooijer, M. Silvius, H. Wösten, S. Page; PEAT-CO2, Assessment of CO 2 emissions from drained peatlands in SE Asia. ... Neuzil, 1997; SG Neuzil; Onset and rate of peat and carbon accumulation in four domed ombrogenous peat deposits, Indonesia. ...	107	http://www.researchgate.net/publication/223545936_Determination_of_the_amount_of_carbon_stored_in_Indonesian_peatlands/file/60b7d52d05938c912c.pdf		http://scholar.google.co.uk/scholar?hl=en&q=%22Determination+of+the+amount+of+carbon+stored+in+Indonesian+peatlands%22&btnG=&as_sdt=1%2C5&as_sdtp=
97	http://127.0.0.1:8000/scholar_005.html	8	Carbon and water dynamics of peat soils in the Australian Alps.	http://arrow.latrobe.edu.au:8080/vital/access/manager/Repository/latrobe:19637	SPP Grover				Thesis	Abstract This research investigated carbon dynamics, water dynamics and peat formation at Wellington Plain peatland in the Victorian Alps. The properties of bog peat and dried peat were measured, and the ensuing results are outlined below. The carbon chemistries of ...	5			http://scholar.google.co.uk/scholar?hl=en&q=%22Carbon+and+water+dynamics+of+peat+soils+in+the+Australian+Alps.%22&btnG=&as_sdt=1%2C5&as_sdtp=
98	http://127.0.0.1:8000/scholar_005.html	8	Factbook for UNFCCC policies on peat carbon emissions		A Kaat, H Joosten			Wetlands International	Grey		6		[CITATION]	http://scholar.google.co.uk/scholar?hl=en&q=%22Factbook+for+UNFCCC+policies+on+peat+carbon+emissions%22&btnG=&as_sdt=1%2C5&as_sdtp=
99	http://127.0.0.1:8000/scholar_005.html	8	Reconstruction of the carbon balance for microsites in a boreal oligotrophic pine fen, Finland	http://link.springer.com/article/10.1007/s004420050177	J Alm , A Talanov, S Saarnio, J Silvola, E Ikkonen…	Oecologia	1997	Springer	Black	... Methane has an even stronger warming potential than CO2 (IPCC 1994 ... on the rate of plant production and the decomposition of organic matter in the peat. Atmospher- ic carbon dioxide is bound by peatland vegetation through photosynthesis during the growing season, and is ...	211			http://scholar.google.co.uk/scholar?hl=en&q=%22Reconstruction+of+the+carbon+balance+for+microsites+in+a+boreal+oligotrophic+pine+fen,+Finland%22&btnG=&as_sdt=1%2C5&as_sdtp=
100	http://127.0.0.1:8000/scholar_005.html	8	Conifer plantations on drained peatlands in Britain: a net gain or loss of carbon ?	http://forestry.oxfordjournals.org/content/66/4/353.short	MGR Cannell, RC Dewar, DG Pyatt	Forestry	1993	Inst Chartered Foresters	Black	... (Table 1). The question posed in this paper is whether the peat drainage that ... release of the greenhouse gas CO2 from afforested peatland areas, which will outweigh the benefit of CO2- carbon fixation by the trees and reduced emission of the greenhouse gas methane, CH4. ...	135			http://scholar.google.co.uk/scholar?hl=en&q=%22Conifer+plantations+on+drained+peatlands+in+Britain:+a+net+gain+or+loss+of+carbon+?%22&btnG=&as_sdt=1%2C5&as_sdtp=
101	http://127.0.0.1:8000/scholar_007.html	9	Temperature, water content and wet–dry cycle effects on DOC production and carbon mineralization in agricultural peat soils	http://www.sciencedirect.com/science/article/pii/S0038071705002415	AT Chow, KK Tanji, S Gao, RA Dahlgren	Soil Biology and Biochemistry	2006	Elsevier	Black	Agricultural peat soils in the Sacramento-San Joaquin Delta, California have been identified as an important source of dissolved organic carbon (DOC) and trihalomethane precursors in waters exported for drinking. The objectives of this study were to examine the primary ...	106	http://www.researchgate.net/publication/222538433_Temperature_water_content_and_wetdry_cycle_effects_on_DOC_production_and_carbon_mineralization_in_agricultural_peat_soils/file/79e4150e5096063bf9.pdf		http://scholar.google.co.uk/scholar?hl=en&q=%22Temperature,+water+content+and+wet–dry+cycle+effects+on+DOC+production+and+carbon+mineralization+in+agricultural+peat+soils%22&btnG=&as_sdt=1%2C5&as_sdtp=
102	http://127.0.0.1:8000/scholar_007.html	9	Controls on the sorption of dissolved organic carbon by soils.	http://journals.lww.com/soilsci/Abstract/1992/08000/Controls_on_the_Sorption_of_Dissolved_Organic.5.aspx	TR Moore, W De Souza, JF Koprivnjak	Soil Science	1992		Black	... the ampule was autoclaved at 121°C for 0.5 h. The inorganic CO2 released by ... 48 soil samples used and the results of the experiment using the peat DOC extract Soil ... 1973) found that DOC precipitation occurred only when a sample had the carbon dioxide removed, resulting in ...	171			http://scholar.google.co.uk/scholar?hl=en&q=%22Controls+on+the+sorption+of+dissolved+organic+carbon+by+soils.%22&btnG=&as_sdt=1%2C5&as_sdtp=
103	http://127.0.0.1:8000/scholar_007.html	9	Oxidation of methane in peat : Kinetics of CH〈 sub〉 4〈/sub〉 and O〈 sub〉 2〈/sub〉 removal and the role of plant roots	http://www.sciencedirect.com/science/article/pii/S0038071797000163	A Watson, KD Stephen, DB Nedwell…	Soil Biology and …	1997	Elsevier	Black	Vertical profiles of oxygen uptake potential were measured in peat. When both O2 and CH4 were in excess, methanotrophy accounted for 85% of the O2 uptake potential, showing a high capacity for CH4 oxidation in the peat. In the absence of CH4, maximum O2 uptake ...	72			http://scholar.google.co.uk/scholar?hl=en&q=%22Oxidation+of+methane+in+peat+:+Kinetics+of+CH〈+sub〉+4〈/sub〉+and+O〈+sub〉+2〈/sub〉+removal+and+the+role+of+plant+roots%22&btnG=&as_sdt=1%2C5&as_sdtp=
104	http://127.0.0.1:8000/scholar_007.html	9	Quantifying the effects of water table and soil temperature on the emission of methane from peat wetland at the field scale	http://www.sciencedirect.com/science/article/pii/S135223109800082X	KJ Hargreaves, D Fowler	Atmospheric Environment	1998	Elsevier	Black	Methane emissions from peat wetlands have been shown to be very sensitive to soil temperature and the position of the water table in controlled environment studies and in the field. However, these studies have been made using small chambers which average ...	97	http://research.eeescience.utoledo.edu/lees/papers_pdf/Hargreaves_1998_AtmEnviron.pdf		http://scholar.google.co.uk/scholar?hl=en&q=%22Quantifying+the+effects+of+water+table+and+soil+temperature+on+the+emission+of+methane+from+peat+wetland+at+the+field+scale%22&btnG=&as_sdt=1%2C5&as_sdtp=
105	http://127.0.0.1:8000/scholar_007.html	9	Methane and Carbon Dioxide Concentrations in Bogs and Fens--with Special Reference to the Effects of the Botanical Composition of the Peat	http://www.jstor.org/stable/2261660	M Nilsson, E Bohlin	Journal of Ecology	1993	JSTOR	Black	1 The relation between concentrations of CH_4 and CO_2 and the botanical and chemical composition of peat is investigated. Peat was sampled from different mires in northern Sweden. The samples were from different depths and had different botanical compositions ...	58			http://scholar.google.co.uk/scholar?hl=en&q=%22Methane+and+Carbon+Dioxide+Concentrations+in+Bogs+and+Fens--with+Special+Reference+to+the+Effects+of+the+Botanical+Composition+of+the+Peat%22&btnG=&as_sdt=1%2C5&as_sdtp=
106	http://127.0.0.1:8000/scholar_007.html	9	Radiocarbon evidence for the substrates supporting methane formation within northern Minnesota peatlands	http://www.sciencedirect.com/science/article/pii/001670379500240Z	JP Chanton , JE Bauer, PA Glaser, DI Siegel…	… et Cosmochimica Acta	1995	Elsevier	Black	... Carbon dioxide release under dark conditions was due mostly to vascular plant respiration rather than to ... emission was related linearly with CO: uptake under light conditions and with CO2 release under ... 8-10 years to completely flush the pore fluids in the deeper peat (Siegel et ...	187			http://scholar.google.co.uk/scholar?hl=en&q=%22Radiocarbon+evidence+for+the+substrates+supporting+methane+formation+within+northern+Minnesota+peatlands%22&btnG=&as_sdt=1%2C5&as_sdtp=
107	http://127.0.0.1:8000/scholar_007.html	9	Effects of available carbon source on microbial activity and suppression of Pythium aphanidermatum in compost and peat container media.	http://www.apsnet.org/publications/phytopathology/backissues/Documents/1990Articles/Phyto80n09_794.PDF	R Mandelbaum, Y Hadar	Phytopathology	1990	apsnet.org	Black	ABSTRACT Mandelbaum, R., and Hadar, V. 1990. Effects of available carbon source on microbial activity and suppression of Pythium itphanidermatum in compost and peat container media. Phytopathology 80: 794-804.	109	http://www.apsnet.org/publications/phytopathology/backissues/Documents/1990Articles/Phyto80n09_794.PDF	[PDF]	http://scholar.google.co.uk/scholar?hl=en&q=%22Effects+of+available+carbon+source+on+microbial+activity+and+suppression+of+Pythium+aphanidermatum+in+compost+and+peat+container+media.%22&btnG=&as_sdt=1%2C5&as_sdtp=
108	http://127.0.0.1:8000/scholar_007.html	9	δ13C values and radiocarbon dates of microbial biomarkers as tracers for carbon recycling in peat deposits	http://geology.gsapubs.org/content/28/7/663.short	RD Pancost , B van Geel , M Baas, JSS Damsté	Geology	2000		Black	Abstract This paper describes the first application of compound-specific stable carbon isotope and radiocarbon isotope analyses to the investigation of microbial processes in peat deposits. Carbon recycling in both modern and ancient peats is fundamental in assessing ...	52	http://www.intl-geology.geoscienceworld.org/content/28/7/663.full		http://scholar.google.co.uk/scholar?hl=en&q=%22δ13C+values+and+radiocarbon+dates+of+microbial+biomarkers+as+tracers+for+carbon+recycling+in+peat+deposits%22&btnG=&as_sdt=1%2C5&as_sdtp=
109	http://127.0.0.1:8000/scholar_007.html	9	Dissolved organic matter properties and their relationship to carbon dioxide efflux from restored peat bogs	http://www.sciencedirect.com/science/article/pii/S0016706102003725	S Glatzel , K Kalbitz , M Dalva, T Moore	Geoderma	2003	Elsevier	Black	The effects of peat bog harvesting and restoration on dissolved organic matter (DOM) are poorly known although DOM represents the most mobile part of organic matter in peat. The aims of our study were:(i) to determine concentrations and properties of DOM in a series of ...	92	http://www.geog.mcgill.ca/faculty/moore/Geoderma_113_397.pdf		http://scholar.google.co.uk/scholar?hl=en&q=%22Dissolved+organic+matter+properties+and+their+relationship+to+carbon+dioxide+efflux+from+restored+peat+bogs%22&btnG=&as_sdt=1%2C5&as_sdtp=
110	http://127.0.0.1:8000/scholar_007.html	9	CH〈 sub〉 4〈/sub〉 production, oxidation and emission in a UK ombrotrophic peat bog: Influence of SO〈 sub〉 4〈/sub〉〈 sup〉 2−〈/sup〉 from acid rain	http://www.sciencedirect.com/science/article/pii/003807179500018A	DB Nedwell, A Watson	Soil Biology and Biochemistry	1995	Elsevier	Black	... INTRODUCTION CH4 is a significant greenhouse gas which has been increasing in the atmosphere at ... CH4 dynamics and SO;- reduction in peat Hesslein RH (1976) An in situ sampler for ... Nilsson M. and Bohlin E. (1993) Methane and carbon dioxide concentrations in bogs and ...	148			http://scholar.google.co.uk/scholar?hl=en&q=%22CH〈+sub〉+4〈/sub〉+production,+oxidation+and+emission+in+a+UK+ombrotrophic+peat+bog:+Influence+of+SO〈+sub〉+4〈/sub〉〈+sup〉+2−〈/sup〉+from+acid+rain%22&btnG=&as_sdt=1%2C5&as_sdtp=
111	http://127.0.0.1:8000/scholar_010.html	10	Release of dissolved organic carbon from upland peat	http://onlinelibrary.wiley.com/doi/10.1002/hyp.1111/full	F Worrall, TP Burt, RY Jaeban…	Hydrological …	2002	Wiley Online Library	Black	Abstract This study examines the release of dissolved organic carbon (DOC) from upland peat during the period of the autumn flushing. Hydroclimatic conditions were monitored in conjunction with measurements of absorbance and the E4/E6 ratio of the stream draining ...	95			http://scholar.google.co.uk/scholar?hl=en&q=%22Release+of+dissolved+organic+carbon+from+upland+peat%22&btnG=&as_sdt=1%2C5&as_sdtp=
112	http://127.0.0.1:8000/scholar_010.html	10	Accumulation rates of carbon in mires in Finland and implications for climate change	http://hol.sagepub.com/content/6/2/171.short	K Tolonen , J Turunen	The Holocene	1996		Black	... Abstract: Stratigraphical analyses based on 1028 dated Holocene peat cores were used to estimate the rate of carbon accumulation in Finnish peatlands. ... net rate of peat carbon accumulation: A = pe-aB where A = net rate of dry mass accumulation (g m-2a-I); ARCA Page 2. 172 ...	158			http://scholar.google.co.uk/scholar?hl=en&q=%22Accumulation+rates+of+carbon+in+mires+in+Finland+and+implications+for+climate+change%22&btnG=&as_sdt=1%2C5&as_sdtp=
113	http://127.0.0.1:8000/scholar_010.html	10	Ecosystem respiration in a cool temperate bog depends on peat temperature but not water table	http://link.springer.com/article/10.1007/s10021-003-0131-2	PM Lafleur, TR Moore, NT Roulet , S Frolking	Ecosystems	2005	Springer	Black	... Ecosystem respiration (ER) is the emission of carbon dioxide to the atmosphere from vegetation (autotrophic) and soil (heterotrophic) activities. ... Figure 5. Relationship between CO2 production during laboratory incubation of intact peat cores, collected from 0 to 45 cm ...	145	http://research.eeescience.utoledo.edu/lees/papers_PDF/Lafleur_2005_Ecosystems.pdf		http://scholar.google.co.uk/scholar?hl=en&q=%22Ecosystem+respiration+in+a+cool+temperate+bog+depends+on+peat+temperature+but+not+water+table%22&btnG=&as_sdt=1%2C5&as_sdtp=
114	http://127.0.0.1:8000/scholar_010.html	10	Temporal and seasonal changes in greenhouse gas emissions from a constructed wetland purifying peat mining runoff waters	http://www.sciencedirect.com/science/article/pii/S0925857405002211	A Liikanen, JT Huttunen, SM Karjalainen…	Ecological …	2006	Elsevier	Black	Constructed wetlands (CW), widely used to remove nutrients from runoff waters, transform some of the carbon and nitrogen they receive into greenhouse gases, carbon dioxide (CO2), methane (CH4), and nitrous oxide (N2O), and may therefore have adverse atmospheric ...	84			http://scholar.google.co.uk/scholar?hl=en&q=%22Temporal+and+seasonal+changes+in+greenhouse+gas+emissions+from+a+constructed+wetland+purifying+peat+mining+runoff+waters%22&btnG=&as_sdt=1%2C5&as_sdtp=
115	http://127.0.0.1:8000/scholar_010.html	10	Indonesian peat swamp forests and their role as a carbon sink	http://www.sciencedirect.com/science/article/pii/004565359390068G	KW Sorensen	Chemosphere	1993	Elsevier	Black	Abstract Peat formation is a true carbon sink, the carbon being sequestered out of the system and converted into peat through biological activity. Peat swamp forests originally represented major ecosystems in Indonesia and ranged between 16.5–27 million ...	60			http://scholar.google.co.uk/scholar?hl=en&q=%22Indonesian+peat+swamp+forests+and+their+role+as+a+carbon+sink%22&btnG=&as_sdt=1%2C5&as_sdtp=
116	http://127.0.0.1:8000/scholar_010.html	10	Current and future CO 2 emissions from drained peatlands in Southeast Asia	http://www.biogeosciences.net/7/1505/2010/bg-7-1505-2010.pdf	A Hooijer , S Page , JG Canadell , M Silvius…	…	2010	biogeosciences.net	Black	... tropical peatland CO2 emissions in global greenhouse gas emission calculations and climate mitigation policies. ... use activities have impacts on the net green- house gas (ghg) balance of ... CO2 uptake by vegetation, (ii) CO2 emissions from drainage-related peat decomposi- tion ...	172	http://www.biogeosciences.net/7/1505/2010/bg-7-1505-2010.pdf	[PDF]	http://scholar.google.co.uk/scholar?hl=en&q=%22Current+and+future+CO+2+emissions+from+drained+peatlands+in+Southeast+Asia%22&btnG=&as_sdt=1%2C5&as_sdtp=
117	http://127.0.0.1:8000/scholar_010.html	10	The full greenhouse gas balance of an abandoned peat meadow	http://www.biogeosciences-discuss.net/4/277/2007/bgd-4-277-2007.pdf	DMD Hendriks, J Huissteden…	Biogeosciences …	2007		Black	Globally, peat lands are considered to be a sink of CO 2, but a source when drained. Additionally, wet peat lands are thought to emit considerable amounts of CH 4 and N 2 O. Hitherto, reliable and integrated estimates of emissions and emission factors for this type ...	93	http://www.biogeosciences-discuss.net/4/277/2007/bgd-4-277-2007.pdf	[PDF]	http://scholar.google.co.uk/scholar?hl=en&q=%22The+full+greenhouse+gas+balance+of+an+abandoned+peat+meadow%22&btnG=&as_sdt=1%2C5&as_sdtp=
118	http://127.0.0.1:8000/scholar_010.html	10	Deuterium, oxygen-18 and carbon -13 in three rings and peat deposits in relation to climate	http://inis.iaea.org/search/search.aspx?orig_q=RN:15067032	CAM Brenninkmeijer				Thesis	This thesis deals with the effect of climate on the 2 H/1 H, 18 O/16 O and 13 C/12 C ratio of cellulose synthesized by plants. In chapter 1, the methods are described. 2 H analysis involves combustion of the organic compound, followed by reduction of the formed water ...	63			http://scholar.google.co.uk/scholar?hl=en&q=%22Deuterium,+oxygen-18+and+carbon+-13+in+three+rings+and+peat+deposits+in+relation+to+climate%22&btnG=&as_sdt=1%2C5&as_sdtp=
119	http://127.0.0.1:8000/scholar_010.html	10	A multi-year perspective on methane cycling in a shallow peat fen in central New York State, USA	http://link.springer.com/article/10.1672/0277-5212(2006)26%5B20:AMPOMC%5D2.0.CO%3B2	KA Smemo, JB Yavitt	Wetlands	2006	Springer	Black	Abstract Minerotrophic sedge fens are common in sub-arctic regions and are a significant source of atmospheric methane (CH 4), yet they have received less attention than other peatlands, such as boreal ombrotrophic bogs, which are smaller sources of CH 4. At the ...	32	http://www.holdenarb.org/Education/documents/smemo-yavitt2006.pdf		http://scholar.google.co.uk/scholar?hl=en&q=%22A+multi-year+perspective+on+methane+cycling+in+a+shallow+peat+fen+in+central+New+York+State,+USA%22&btnG=&as_sdt=1%2C5&as_sdtp=
120	http://127.0.0.1:8000/scholar_010.html	10	Annual methane emission from Finnish mires estimated from eddy covariance campaign measurements	http://link.springer.com/article/10.1007/s007040170015	KJ Hargreaves, D Fowler , CER Pitcairn…	Theoretical and Applied …	2001	Springer	Black	... JB, Kolb CE (1992) Microme- teorological measurements of CH4 and CO2 exchange between ... 356 Friborg T, Christensen TR, Soegaard H (1997) Rapid response of greenhouse gas emission to ... soil temperature and water table on the emission of methane from peat wetland at ...	107	http://research.eeescience.utoledo.edu/lees/papers_pdf/Hargreaves_2001_TheorApplClimatol.pdf		http://scholar.google.co.uk/scholar?hl=en&q=%22Annual+methane+emission+from+Finnish+mires+estimated+from+eddy+covariance+campaign+measurements%22&btnG=&as_sdt=1%2C5&as_sdtp=
121	http://127.0.0.1:8000/scholar_011.html	11	Methane oxidation potential and preliminary analysis of methanotrophs in blanket bog peat using molecular ecology techniques	http://onlinelibrary.wiley.com/doi/10.1111/j.1574-6941.1996.tb00347.x/full	IR McDonald , GH Hall, RW Pickup…	FEMS microbiology …	1996	Wiley Online Library	Black	Abstract: The potential for methane oxidation was measured, and methanotroph gene sequences studied, in a peat core from the Moorhouse Nature Reserve, UK. Methane oxidation potential was observed in all depths of the peat core (down to 30 cm), and was ...	83	http://onlinelibrary.wiley.com/doi/10.1111/j.1574-6941.1996.tb00347.x/pdf		http://scholar.google.co.uk/scholar?hl=en&q=%22Methane+oxidation+potential+and+preliminary+analysis+of+methanotrophs+in+blanket+bog+peat+using+molecular+ecology+techniques%22&btnG=&as_sdt=1%2C5&as_sdtp=
122	http://127.0.0.1:8000/scholar_011.html	11	Carbon isotopes in ombrogenic peat bog plants as climatic indicators: calibration from an altitudinal transect in Switzerland	http://www.sciencedirect.com/science/article/pii/S0146638000001704	G Ménot , SJ Burns	Organic Geochemistry	2001	Elsevier	Black	The accumulation of organic matter in peat bogs potentially constitutes a continuous and high-resolution record of continental climate for the Holocene period. In order to interpret the carbon isotopic values of bog plant macrofossils as a record of environmental parameters, ...	89			http://scholar.google.co.uk/scholar?hl=en&q=%22Carbon+isotopes+in+ombrogenic+peat+bog+plants+as+climatic+indicators:+calibration+from+an+altitudinal+transect+in+Switzerland%22&btnG=&as_sdt=1%2C5&as_sdtp=
123	http://127.0.0.1:8000/scholar_011.html	11	Global prevalence of methane oxidation by symbiotic bacteria in peat -moss ecosystems	http://www.nature.com/ngeo/journal/v3/n9/abs/ngeo939.html	N Kip , JF van Winden, Y Pan, L Bodrossy …	Nature …	2010	nature.com	Black	Abstract Peat bogs store up to a third of all terrestrial carbon on Earth 1, and are one of the largest natural sources of atmospheric methane 2. Anaerobic degradation of submerged Sphagnum species—mosses that are prevalent in peat bogs across the globe—produces ...	82	http://www.nature.com/ngeo/journal/v3/n9/full/ngeo939.html		http://scholar.google.co.uk/scholar?hl=en&q=%22Global+prevalence+of+methane+oxidation+by+symbiotic+bacteria+in+peat+-moss+ecosystems%22&btnG=&as_sdt=1%2C5&as_sdtp=
124	http://127.0.0.1:8000/scholar_011.html	11	Carbon dioxide and methane formation in forest mineral and peat soils during aerobic and anaerobic incubations	http://www.sciencedirect.com/science/article/pii/003807179390090X	T Magnusson	Soil Biology and Biochemistry	1993	Elsevier	Black	Mineral and organic samples incubated anaerobically both showed a decline in CO 2 production rate with increasing time of incubation. The decline was more strongly related to incubation time than to the absolute concentrations of CO 2 in the vials. The rates after 19 wk were ...	61			http://scholar.google.co.uk/scholar?hl=en&q=%22Carbon+dioxide+and+methane+formation+in+forest+mineral+and+peat+soils+during+aerobic+and+anaerobic+incubations%22&btnG=&as_sdt=1%2C5&as_sdtp=
125	http://127.0.0.1:8000/scholar_011.html	11	Carbon in the vegetation and soils of Great Britain	http://www.sciencedirect.com/science/article/pii/S0301479785701181	R Milne, TA Brown	Journal of Environmental Management	1997	Elsevier	Black	... Scottish peat soils have the greatest density of carbon and in total contain 4523 Mt of carbon, 46% of the GB total. ... and other vegetation are an important part of the pool of carbon and changes in size and productivity of the pool may act as a sink or source for carbon dioxide. ...	194	http://www.see.ed.ac.uk/~shs/Climate%20change/Carbon%20sequestration/UK%20soilcarbon.pdf		http://scholar.google.co.uk/scholar?hl=en&q=%22Carbon+in+the+vegetation+and+soils+of+Great+Britain%22&btnG=&as_sdt=1%2C5&as_sdtp=
126	http://127.0.0.1:8000/scholar_011.html	11	Global and regional importance of the tropical peatland carbon pool	http://onlinelibrary.wiley.com/doi/10.1111/j.1365-2486.2010.02279.x/full	SE Page , JO Rieley, CJ Banks	Global Change Biology	2011	Wiley Online Library	Black	... These results emphasize the prominent global and regional roles played by the tropical peat carbon pool and the importance of including this pool in national and regional assessments of terrestrial carbon stocks and the prediction of peat-derived greenhouse gas emissions. ...	174	http://hal.archives-ouvertes.fr/docs/00/59/95/18/PDF/PEER_stage2_10.1111%252Fj.1365-2486.2010.02279.x.pdf		http://scholar.google.co.uk/scholar?hl=en&q=%22Global+and+regional+importance+of+the+tropical+peatland+carbon+pool%22&btnG=&as_sdt=1%2C5&as_sdtp=
127	http://127.0.0.1:8000/scholar_011.html	11	Methane consumption in decomposing〈 i〉 Sphagnum〈/i〉-derived peat	http://www.sciencedirect.com/science/article/pii/003807179090176Z	JB Yavitt , DM Downey, E Lancaster, GE Lang	Soil biology and …	1990	Elsevier	Black	Abstract Methane production and CH 4 consumption by moss-derived peats were measured and related to CH 4 emission from the same peats to the atmosphere. Peat samples (0–40 cm depth) maintained under anoxic conditions at 19 C for 40 h produced CH 4 at rates ...	76			http://scholar.google.co.uk/scholar?hl=en&q=%22Methane+consumption+in+decomposing〈+i〉+Sphagnum〈/i〉-derived+peat%22&btnG=&as_sdt=1%2C5&as_sdtp=
128	http://127.0.0.1:8000/scholar_011.html	11	High-resolution records of late-Holocene climate change and carbon accumulation in two north-west European ombrotrophic peat bogs	http://www.sciencedirect.com/science/article/pii/S0031018202005138	D Mauquoy, T Engelkes , MHM Groot…	Palaeogeography	2002	Elsevier	Black	The peat stratigraphy (plant macrofossils, colorimetric humification, pollen/non-pollen microfossils, carbon/nitrogen ratios) of three replicate cores from a raised peat bog in the UK (Walton Moss) and a single core from a raised peat bog in Denmark (Lille Vildmose) were ...	97	http://cio.eldoc.ub.rug.nl/FILES/root/2002/PageoPaclPaecMauquoy/2002PalgeogrPalclimPalecolMauquoy.pdf		http://scholar.google.co.uk/scholar?hl=en&q=%22High-resolution+records+of+late-Holocene+climate+change+and+carbon+accumulation+in+two+north-west+European+ombrotrophic+peat+bogs%22&btnG=&as_sdt=1%2C5&as_sdtp=
129	http://127.0.0.1:8000/scholar_011.html	11	The flux of CO2 and CH4 from lakes and rivers in arctic Alaska	http://link.springer.com/article/10.1007/BF00013449	GW Kling , GW Kipphut, MC Miller	Hydrobiologia	1992	Springer	Black	... The input of terrestrial peat can dominate carbon cy- cling in more inland rivers as well (Peterson et al ... Year to year variations in CO2 flux for Lake N2 are shown in Table 3. The ... and in the Kuparuk River; PCH4 was measured directly and the concentration of CH4 was calculated ...	232	http://www.researchgate.net/publication/225682805_The_flux_of_CO2_and_CH4_from_lakes_and_rivers_in_arctic_Alaska/file/3deec51e96311c034e.pdf		http://scholar.google.co.uk/scholar?hl=en&q=%22The+flux+of+CO2+and+CH4+from+lakes+and+rivers+in+arctic+Alaska%22&btnG=&as_sdt=1%2C5&as_sdtp=
130	http://127.0.0.1:8000/scholar_011.html	11	High field carbon -13 NMR spectroscopy. Conformational mobility in gramicidin S and frequency dependence of〈 sup〉 13〈/sup〉 C spin-lattice relaxation times	http://www.sciencedirect.com/science/article/pii/S0006291X75800891	RA Komoroski, IR Peat , GC Levy	Biochemical and biophysical research …	1975	Elsevier	Black	Summary The use of superconducting solenoids in 13 C NMR can result in a substantial increase in spectral resolution over that obtained at commonly employed magnetic fields. Results are presented here for the cyclic decapeptide gramicidin S in both CD 3 OD and ...	38			http://scholar.google.co.uk/scholar?hl=en&q=%22High+field+carbon+-13+NMR+spectroscopy.+Conformational+mobility+in+gramicidin+S+and+frequency+dependence+of〈+sup〉+13〈/sup〉+C+spin-lattice+relaxation+times%22&btnG=&as_sdt=1%2C5&as_sdtp=
131	http://127.0.0.1:8000/scholar_008.html	12	Carbon balance of a boreal patterned peatland	http://onlinelibrary.wiley.com/doi/10.1046/j.1365-2486.2000.00283.x/full	JM Waddington , NT Roulet	Global Change Biology	2000	Wiley Online Library	Black	... Keywords: atmosphere, carbon dioxide, carbon storage, DOC, methane, peatland ... in peatlands represents a reduc- tion of approximately 50ppm of atmospheric CO2 (Franzen et al. ... The accumulation and growth of peat has been modelled successfully for certain peatland types ...	167	http://127.0.0.1:8000/scholar?q=info:ZqGvkcbromUJ:scholar.google.com/&output=instlink&hl=en&as_sdt=0,5&scillfp=7971817100274417674&oi=lle		http://scholar.google.co.uk/scholar?hl=en&q=%22Carbon+balance+of+a+boreal+patterned+peatland%22&btnG=&as_sdt=1%2C5&as_sdtp=
132	http://127.0.0.1:8000/scholar_008.html	12	The multi-annual carbon budget of a peat -covered catchment	http://www.sciencedirect.com/science/article/pii/S0048969709002368	F Worrall, TP Burt, JG Rowson, J Warburton…	Science of the total …	2009	Elsevier	Black	This study estimates the complete carbon budget of an 11.4 km2 peat-covered catchment in Northern England. The budget considers both fluvial and gaseous carbon fluxes and includes estimates of particulate organic carbon (POC); dissolved organic carbon (DOC); ...	50	http://repository.edgehill.ac.uk/4468/1/Multi_annual_carbon_budget_of_a_peat_catchment.pdf		http://scholar.google.co.uk/scholar?hl=en&q=%22The+multi-annual+carbon+budget+of+a+peat+-covered+catchment%22&btnG=&as_sdt=1%2C5&as_sdtp=
133	http://127.0.0.1:8000/scholar_008.html	12	Methane production and emission from peat : the influence of anions (sulphate, nitrate) from acid rain	http://www.sciencedirect.com/science/article/pii/S1352231097005013	A Watson, DB Nedwell	Atmospheric Environment	1998	Elsevier	Black	The influence of sulphate concentrations on the production and emission of methane in two contrasting peat sites was determined. Seasonal changes in sulphate concentrations appeared to influence the amount of organic carbon oxidised to carbon dioxide by ...	65			http://scholar.google.co.uk/scholar?hl=en&q=%22Methane+production+and+emission+from+peat+:+the+influence+of+anions+(sulphate,+nitrate)+from+acid+rain%22&btnG=&as_sdt=1%2C5&as_sdtp=
134	http://127.0.0.1:8000/scholar_008.html	12	Effect of water-level drawdown on global climatic warming: Northern peatlands	http://www.jstor.org/stable/4314450	J Laine, J Silvola, K Tolonen , J Alm , H Nykänen…	Ambio	1996	JSTOR	Black	... be used as a time-dependent index de- scribing the dynamic greenhouse impact due to the greenhouse- gas emission and ... level drawdown has been predicted to enhance the greenhouse impact from northern peatlands due to CO2 emissions from decaying peat. ...	124			http://scholar.google.co.uk/scholar?hl=en&q=%22Effect+of+water-level+drawdown+on+global+climatic+warming:+Northern+peatlands%22&btnG=&as_sdt=1%2C5&as_sdtp=
135	http://127.0.0.1:8000/scholar_008.html	12	An enzymic'latch'on a global carbon store	http://www.nature.com/nature/journal/v409/n6817/full/409149a0.html	C Freeman , N Ostle, H Kang	Nature	2001	nature.com	Black	... Historically, northern peatlands have removed carbon dioxide from the atmosphere faster than it has been re ... be all that prevents the re-release of a major store of global carbon into the ... We found that the activity of hydrolases in peat samples exposed to phenolic-free waters was ...	491	http://nm.snu.ac.kr/jaes/pdf/nature.pdf		http://scholar.google.co.uk/scholar?hl=en&q=%22An+enzymic'latch'on+a+global+carbon+store%22&btnG=&as_sdt=1%2C5&as_sdtp=
136	http://127.0.0.1:8000/scholar_008.html	12	Short-term impact of peat drain-blocking on water colour, dissolved organic carbon concentration, and water table depth	http://www.sciencedirect.com/science/article/pii/S002216940700073X	F Worrall, A Armstrong, J Holden	Journal of Hydrology	2007	Elsevier	Black	Water discolouration is a major management problem for UK water companies as a proportion of the supply relies on runoff from peat-covered catchments. Many peats have been drained using surface ditches but this has been shown to lead to more severe water ...	80			http://scholar.google.co.uk/scholar?hl=en&q=%22Short-term+impact+of+peat+drain-blocking+on+water+colour,+dissolved+organic+carbon+concentration,+and+water+table+depth%22&btnG=&as_sdt=1%2C5&as_sdtp=
137	http://127.0.0.1:8000/scholar_008.html	12	Sources of organic and inorganic carbon in a headwater stream: evidence from carbon isotope studies	http://link.springer.com/article/10.1023/A:1006447706565	SM Palmer, D Hope, MF Billett, JJC Dawson , CL Bryant	Biogeochemistry	2001	Springer	Black	... and streamwater contains carbon that is approximately 2500 calendar years younger than peat at 1m ... R & Siegenthaler U (1991) Production and stable isotopic composition of CO2 in a ... 344 Hope D, Palmer SM, Billett MF & Dawson JJC (in review) Carbon dioxide and methane ...	121			http://scholar.google.co.uk/scholar?hl=en&q=%22Sources+of+organic+and+inorganic+carbon+in+a+headwater+stream:+evidence+from+carbon+isotope+studies%22&btnG=&as_sdt=1%2C5&as_sdtp=
138	http://127.0.0.1:8000/scholar_008.html	12	Decomposition of peat from upland boreal forest: Temperature dependence and sources of respired carbon	http://onlinelibrary.wiley.com/doi/10.1029/2001JD000848/full	I Dioumaeva, S Trumbore , EAG Schuur …	Journal of …	2002	Wiley Online Library	Black	[2] Nearly half of the carbon stored in forested ecosystems is in boreal forests, and 84% of it is stored in soil organic matter [Dixon et al., 1994]. The amount of carbon stored in boreal peatlands alone is 190–550 Pg C [Gorham, 1991]. This carbon has accumulated over the ...	77	http://onlinelibrary.wiley.com/doi/10.1029/2001JD000848/full	[HTML]	http://scholar.google.co.uk/scholar?hl=en&q=%22Decomposition+of+peat+from+upland+boreal+forest:+Temperature+dependence+and+sources+of+respired+carbon%22&btnG=&as_sdt=1%2C5&as_sdtp=
139	http://127.0.0.1:8000/scholar_008.html	12	Different effects of peat degradation on dissolved organic carbon and nitrogen	http://www.sciencedirect.com/science/article/pii/S0146638001001632	K Kalbitz , S Geyer	Organic Geochemistry	2002	Elsevier	Black	The dynamics of dissolved organic matter (DOM) are closely related to organic matter processes such as decomposition, humification, and stabilization of organic matter in soils. Nevertheless, it is unknown whether dissolved organic carbon (DOC) and nitrogen (DON) ...	76			http://scholar.google.co.uk/scholar?hl=en&q=%22Different+effects+of+peat+degradation+on+dissolved+organic+carbon+and+nitrogen%22&btnG=&as_sdt=1%2C5&as_sdtp=
140	http://127.0.0.1:8000/scholar_008.html	12	Spatial and temporal trends in carbon storage of peatlands of continental western Canada through the Holocene	http://www.nrcresearchpress.com/doi/abs/10.1139/e99-097	DH Vitt, LA Halsey , IE Bauer…	Canadian Journal of …	2000	NRC Research Press	Black	... Peat accumu- lates in wetlands where the rate of biomass production is greater than ... Peatland carbon dynamics influence atmospheric CO2 and CH4 concentra- tions and thus, future ... in peatland carbon storage have the potential to influence greenhouse gas-induced warming ...	205	http://cjes.geoscienceworld.org/content/37/5/683.full		http://scholar.google.co.uk/scholar?hl=en&q=%22Spatial+and+temporal+trends+in+carbon+storage+of+peatlands+of+continental+western+Canada+through+the+Holocene%22&btnG=&as_sdt=1%2C5&as_sdtp=
141	http://127.0.0.1:8000/scholar_009.html	13	Long‐term drainage for forestry inhibits extracellular phenol oxidase activity in Finnish boreal mire peat	http://onlinelibrary.wiley.com/doi/10.1111/j.1365-2389.2010.01292.x/full	H Toberman, R Laiho , CD Evans …	European journal of …	2010	Wiley Online Library	Black	... Minkkinen et al. (1999) found that drainage at Lakkasuo has substantially lowered the water table, accompanied by greater carbon dioxide emissions and smaller methane emissions. This suggests greater aeration of the surface peat following drainage. ...	15			http://scholar.google.co.uk/scholar?hl=en&q=%22Long‐term+drainage+for+forestry+inhibits+extracellular+phenol+oxidase+activity+in+Finnish+boreal+mire+peat%22&btnG=&as_sdt=1%2C5&as_sdtp=
142	http://127.0.0.1:8000/scholar_009.html	13	Long-term increases in surface water dissolved organic carbon : observations, possible causes and environmental impacts	http://www.sciencedirect.com/science/article/pii/S0269749105000540	CD Evans , DT Monteith , DM Cooper	Environmental Pollution	2005	Elsevier	Black	... transfer of carbon from terrestrial to aquatic and ultimately marine ecosystems, forms a significant component of the global carbon cycle (Hope ... (1997) demonstrated a correlation between riverine DOC flux and the amount of organic matter (predominantly peat) in catchment ...	447	http://www.jlakes.org/web/DOC-increase-in-water-EP2005.pdf		http://scholar.google.co.uk/scholar?hl=en&q=%22Long-term+increases+in+surface+water+dissolved+organic+carbon+:+observations,+possible+causes+and+environmental+impacts%22&btnG=&as_sdt=1%2C5&as_sdtp=
143	http://127.0.0.1:8000/scholar_009.html	13	Carbon and peat accumulation over the past 1200 years in a landscape with discontinuous permafrost, northwestern Canada	http://onlinelibrary.wiley.com/doi/10.1029/1999GB900008/full	SD Robinson, TR Moore	Global Biogeochemical Cycles	1999	Wiley Online Library	Black	Abstract. Apparent recent carbon and peat accumulation rates over the past 1200 years were measured in five peat landforms in the discontinuous permafrost zone near Fort Simpson, Northwest Territories, Canada. The White River volcanic ash layer was used as ...	53	http://onlinelibrary.wiley.com/doi/10.1029/1999GB900008/pdf		http://scholar.google.co.uk/scholar?hl=en&q=%22Carbon+and+peat+accumulation+over+the+past+1200+years+in+a+landscape+with+discontinuous+permafrost,+northwestern+Canada%22&btnG=&as_sdt=1%2C5&as_sdtp=
144	http://127.0.0.1:8000/scholar_009.html	13	Air gasification of peat , wood and brown coal in a pressurized fluidized-bed reactor. I. Carbon conversion, gas yields and tar formation	http://www.sciencedirect.com/science/article/pii/037838209290038R	E Kurkela, P Ståhlberg	Fuel Processing Technology	1992	Elsevier	Black	Abstract Fluidized bed air gasification of Finnish peat, sawdust and German brown coal were studied in a small pressurized fluidized-bed pilot plant operated at 0.4–1.0 MPa. The effects of air-to-fuel-ratio and other gasification variables on the conversion efficiencies ...	83			http://scholar.google.co.uk/scholar?hl=en&q=%22Air+gasification+of+peat+,+wood+and+brown+coal+in+a+pressurized+fluidized-bed+reactor.+I.+Carbon+conversion,+gas+yields+and+tar+formation%22&btnG=&as_sdt=1%2C5&as_sdtp=
145	http://127.0.0.1:8000/scholar_009.html	13	Carbon exchange of grazed pasture on a drained peat soil	http://onlinelibrary.wiley.com/doi/10.1111/j.1365-2486.2005.00929.x/full	JP Nieveen, DI Campbell, LA Schipper …	Global Change …	2005	Wiley Online Library	Black	Abstract Land-use changes have contributed to increased atmospheric CO 2 concentrations. Conversion from natural peatlands to agricultural land has led to widespread subsidence of the peat surface caused by soil compaction and mineralization. To study the net ...	75	http://127.0.0.1:8000/scholar?q=info:ZzXrF88NyEIJ:scholar.google.com/&output=instlink&hl=en&as_sdt=0,5&scillfp=12060760983131475001&oi=lle		http://scholar.google.co.uk/scholar?hl=en&q=%22Carbon+exchange+of+grazed+pasture+on+a+drained+peat+soil%22&btnG=&as_sdt=1%2C5&as_sdtp=
146	http://127.0.0.1:8000/scholar_009.html	13	Carbon balance of afforested peatland in Scotland	http://forestry.oxfordjournals.org/content/76/3/299.short	KJ Hargreaves, R Milne, MGR Cannell	Forestry	2003	Inst Chartered Foresters	Black	... In their undisturbed state, peatlands emit the greenhouse gas methane, but accumulate C derived from atmospheric CO2 (as they ... ground vegeta- tion, this exchange consists entirely of the loss of carbon from decomposing peat. ... The CO2 concentration was output as a 0–5 V ...	124	http://forestry.oxfordjournals.org/content/76/3/299.full.pdf		http://scholar.google.co.uk/scholar?hl=en&q=%22Carbon+balance+of+afforested+peatland+in+Scotland%22&btnG=&as_sdt=1%2C5&as_sdtp=
147	http://127.0.0.1:8000/scholar_009.html	13	Carbon accumulation in peatland	http://www.jstor.org/stable/3547057	RS Clymo , J Turunen, K Tolonen	Oikos	1998	JSTOR	Black	... relation to CO2 and CH4. We take the logical step of expressing the results for carbon in chemical units rather than mass ones. This makes carbon balance calculations straight- forward (carbon in peat, CO2 and CH4, for example, ...	311	http://webspace.qmul.ac.uk/clymo/Clymo-article-PDFs/56-Clymo-Turunen-Tolonen-1998-Carbon-accumulation.pdf		http://scholar.google.co.uk/scholar?hl=en&q=%22Carbon+accumulation+in+peatland%22&btnG=&as_sdt=1%2C5&as_sdtp=
148	http://127.0.0.1:8000/scholar_009.html	13	Controls on suppression of methane flux from a peat bog subjected to simulated acid rain sulfate deposition	http://onlinelibrary.wiley.com/doi/10.1029/2000GB001370/full	V Gauci , N Dise, D Fowler	Global Biogeochemical Cycles	2002	Wiley Online Library	Black	[1] The effect of acid rain SO4 2Ā deposition on peatland CH4 emissions was examined by manipulating SO4 2Ā inputs to a pristine raised peat bog in northern Scotland. Weekly pulses of dissolved Na2SO4 were applied to the bog over two years in doses of 25, 50, ...	72	http://onlinelibrary.wiley.com/doi/10.1029/2000GB001370/full	[HTML]	http://scholar.google.co.uk/scholar?hl=en&q=%22Controls+on+suppression+of+methane+flux+from+a+peat+bog+subjected+to+simulated+acid+rain+sulfate+deposition%22&btnG=&as_sdt=1%2C5&as_sdtp=
149	http://127.0.0.1:8000/scholar_009.html	13	Radiocarbon and stable carbon isotopic evidence for transport and transformation of dissolved organic carbon , dissolved inorganic carbon , and CH4 in a northern …	http://onlinelibrary.wiley.com/doi/10.1029/1999GB001221/full	LS Chasar, JP Chanton , PH Glaser…	Global …	2000	Wiley Online Library	Black	... fluxes, with rates varying from 22 to 1943 mg C m -2 d '• for CH4, and 1.5 to 15.5 g C m-2d '• for CO2 [Chasar et aI., 2000 ... Until recently (ie, prior to late 1980s), pore water flow through the deep anaerobic portion of a peat column (the cato- telm) was considered negligible. ...	127	http://onlinelibrary.wiley.com/doi/10.1029/1999GB001221/pdf		http://scholar.google.co.uk/scholar?hl=en&q=%22Radiocarbon+and+stable+carbon+isotopic+evidence+for+transport+and+transformation+of+dissolved+organic+carbon+,+dissolved+inorganic+carbon+,+and+CH4+in+a+northern+…%22&btnG=&as_sdt=1%2C5&as_sdtp=
150	http://127.0.0.1:8000/scholar_009.html	13	The importance of floating peat to methane fluxes from flooded peatlands	http://link.springer.com/article/10.1007/BF00994922	KJ Scott, CA Kelly, JWM Rudd	Biogeochemistry	1999	Springer	Black	Abstract The effect of flooding on methane (CH 4) fluxes was studied through the construction of an experimental reservoir in a boreal forest wetland at the Experimental Lakes Area in northwestern Ontario. Prior to flooding, the peatland surface was a small ...	41			http://scholar.google.co.uk/scholar?hl=en&q=%22The+importance+of+floating+peat+to+methane+fluxes+from+flooded+peatlands%22&btnG=&as_sdt=1%2C5&as_sdtp=
151	http://127.0.0.1:8000/scholar_014.html	14	Carbon balance and radiative forcing of Finnish peatlands 1900–2100–the impact of forestry drainage	http://onlinelibrary.wiley.com/doi/10.1046/j.1365-2486.2002.00504.x/full	K Minkkinen, R Korhonen, I Savolainen…	Global Change …	2002	Wiley Online Library	Black	... Natural peatlands accumulate carbon (C) and nitrogen (N). They affect the global climate by binding carbon dioxide (CO 2 ) and ... Greenhouse gas balances. Annual peat GHG balances used in calculations are shown in Table 2. The long-term peat C balance values were ...	138	http://127.0.0.1:8000/scholar?q=info:rzgn7dMFL7kJ:scholar.google.com/&output=instlink&hl=en&as_sdt=0,5&scillfp=5991095844810525865&oi=lle		http://scholar.google.co.uk/scholar?hl=en&q=%22Carbon+balance+and+radiative+forcing+of+Finnish+peatlands+1900–2100–the+impact+of+forestry+drainage%22&btnG=&as_sdt=1%2C5&as_sdtp=
152	http://127.0.0.1:8000/scholar_014.html	14	Emission factors and their uncertainty for the exchange of CO2 , CH4 and N2O in Finnish managed peatlands	http://cat.inist.fr/?aModele=afficheN&cpsidt=18767565	J Alm , NJ Shurpali , K Minkkinen, L Aro…	Boreal Environment …	2007		Black	... trees. ; soils. ; drainage. ; forests. ; forestry. ; reforestation. ; afforestation. ; atmosphere. ; peat. ; peat bogs. ; Carbon dioxide. ; Mots-clés français / French Keywords. Europe. ; Scandinavie. ; Finlande. ; Boréal. ; Modèle. ; Climat. ; Adaptation. ; Température. ; Respiration. ; Réchauffement ...	77			http://scholar.google.co.uk/scholar?hl=en&q=%22Emission+factors+and+their+uncertainty+for+the+exchange+of+CO2+,+CH4+and+N2O+in+Finnish+managed+peatlands%22&btnG=&as_sdt=1%2C5&as_sdtp=
153	http://127.0.0.1:8000/scholar_014.html	14	Effect of changing groundwater levels caused by land-use changes on greenhouse gas fluxes from tropical peat lands	http://link.springer.com/article/10.1007/s10705-004-5286-5	Y Furukawa, K Inubushi, M Ali, AM Itang…	Nutrient Cycling in …	2005	Springer	Black	Abstract Monthly measurements of carbon dioxide (CO 2), methane (CH 4) and nitrous oxide (N 2 O) fluxes in peat soils were carried out and compared with groundwater level over a year at four sites (drained forest, upland cassava, upland and lowland paddy fields) ...	66			http://scholar.google.co.uk/scholar?hl=en&q=%22Effect+of+changing+groundwater+levels+caused+by+land-use+changes+on+greenhouse+gas+fluxes+from+tropical+peat+lands%22&btnG=&as_sdt=1%2C5&as_sdtp=
154	http://127.0.0.1:8000/scholar_014.html	14	Ebullition of methane ‐containing gas bubbles from near‐surface Sphagnum peat	http://onlinelibrary.wiley.com/doi/10.1029/2004GL021157/full	AJ Baird, CW Beckwith, S Waldron…	Geophysical …	2004	Wiley Online Library	Black	[2] It has been shown that ebullition of biogenic gas bubbles is an important mechanism of CH4 transfer between bogs and the atmosphere [eg, Rosenberry et al., 2003; Glaser et al., 2004]. However, most studies that have been done on ebullition from bogs have looked at ...	74	http://onlinelibrary.wiley.com/doi/10.1029/2004GL021157/full	[HTML]	http://scholar.google.co.uk/scholar?hl=en&q=%22Ebullition+of+methane+‐containing+gas+bubbles+from+near‐surface+Sphagnum+peat%22&btnG=&as_sdt=1%2C5&as_sdtp=
155	http://127.0.0.1:8000/scholar_014.html	14	Finding of probable Tunguska Cosmic Body material:: isotopic anomalies of carbon and hydrogen in peat	http://www.sciencedirect.com/science/article/pii/S0032063399000069	EM Kolesnikov, T Boettger, NV Kolesnikova	Planetary and space science	1999	Elsevier	Black	Method of a search for traces of Tunguska Cosmic Body (TCB) material using layer-by-layer analysis of the isotopic composition of light elements in peat has been offered. Four peat columns sampled at the explosion epicentre indicated significant carbon and hydrogen ...	34			http://scholar.google.co.uk/scholar?hl=en&q=%22Finding+of+probable+Tunguska+Cosmic+Body+material::+isotopic+anomalies+of+carbon+and+hydrogen+in+peat%22&btnG=&as_sdt=1%2C5&as_sdtp=
156	http://127.0.0.1:8000/scholar_014.html	14	Microbiological processes in the terrestrial carbon cycle: methane cycling in peat	http://www.sciencedirect.com/science/article/pii/S1352231098001071	C Edwards, BA Hales, GH Hall, IR McDonald …	Atmospheric …	1998	Elsevier	Black	Coring and cutting devices were developed to extract 30cm cores from peat under conditions which preserve their physical/spatial integrity, maintain anoxic conditions and allow transverse sectioning. Methane production potential, measured on 1–2cm vertical ...	67	http://research.eeescience.utoledo.edu/lees/papers_PDF/Edwards_1998_AtmEnviron.pdf		http://scholar.google.co.uk/scholar?hl=en&q=%22Microbiological+processes+in+the+terrestrial+carbon+cycle:+methane+cycling+in+peat%22&btnG=&as_sdt=1%2C5&as_sdtp=
157	http://127.0.0.1:8000/scholar_014.html	14	Elevated atmospheric CO2 and increased nitrogen deposition: effects on C and N metabolism and growth of the peat moss Sphagnum recurvum P. Beauv. var. …	http://onlinelibrary.wiley.com/doi/10.1046/j.1365-2486.2000.00303.x/full	E Van Der Heijden, SK Verbeek…	Global Change …	2000	Wiley Online Library	Black	Summary Sphagnum bogs play an important role when considering the impacts of global change on global carbon and nitrogen cycles. Sphagnum recurvum P. Beauv. var. mucronatum (Russ.) was grown at 360 (ambient) and 700 μL L− 1 (elevated) atmospheric ...	71	http://127.0.0.1:8000/scholar?q=info:rewihLvmzvkJ:scholar.google.com/&output=instlink&hl=en&as_sdt=0,5&scillfp=11629927391224929579&oi=lle		http://scholar.google.co.uk/scholar?hl=en&q=%22Elevated+atmospheric+CO2+and+increased+nitrogen+deposition:+effects+on+C+and+N+metabolism+and+growth+of+the+peat+moss+Sphagnum+recurvum+P.+Beauv.+var.+…%22&btnG=&as_sdt=1%2C5&as_sdtp=
158	http://127.0.0.1:8000/scholar_014.html	14	Seasonal variation in rates of methane production from peat of various botanical origins: effects of temperature and substrate quality	http://onlinelibrary.wiley.com/doi/10.1111/j.1574-6941.2000.tb00740.x/full	I Bergman, M Klarqvist, M Nilsson	FEMS Microbiology …	2000	Wiley Online Library	Black	Abstract The methane produced in peat soils can vary over the growing season due to variations in the supply of available substrate, the activity of the microbial community or changes in temperature. Our aim was to study how these factors regulate the methane ...	63	http://onlinelibrary.wiley.com/doi/10.1111/j.1574-6941.2000.tb00740.x/full	[HTML]	http://scholar.google.co.uk/scholar?hl=en&q=%22Seasonal+variation+in+rates+of+methane+production+from+peat+of+various+botanical+origins:+effects+of+temperature+and+substrate+quality%22&btnG=&as_sdt=1%2C5&as_sdtp=
159	http://127.0.0.1:8000/scholar_014.html	14	Aboveground peat and carbon accumulation potentials along a bog-fen-marsh wetland gradient in southern boreal Alberta, Canada	http://link.springer.com/article/10.1007/BF03161761	MN Thormann, AR Szumigalski, SE Bayley	Wetlands	1999	Springer	Black	Abstract Production-to-decomposition quotients and asymptotic limits of peat accumulation were determined to estimate peat and carbon accumulation potentials along a bog-fen- marsh wetland gradient in southern boreal Alberta. The wetlands were a bog, a poor fen ( ...	70			http://scholar.google.co.uk/scholar?hl=en&q=%22Aboveground+peat+and+carbon+accumulation+potentials+along+a+bog-fen-marsh+wetland+gradient+in+southern+boreal+Alberta,+Canada%22&btnG=&as_sdt=1%2C5&as_sdtp=
160	http://127.0.0.1:8000/scholar_014.html	14	Emissions of CO2 , CH4 and N2O from pasture on drained peat soils in the Netherlands	http://www.sciencedirect.com/science/article/pii/S1161030197000361	CA Langeveld, R Segers, BOM Dirks…	European Journal of …	1997	Elsevier	Black	Soils have an important role in the global budgets of the greenhouse gases carbon dioxide (CO2), methane (CH4) and nitrous oxide (N2O). In particular, peat soils are considered to exhibit relatively high emission rates. The purpose of this study is to make an integrated ...	62			http://scholar.google.co.uk/scholar?hl=en&q=%22Emissions+of+CO2+,+CH4+and+N2O+from+pasture+on+drained+peat+soils+in+the+Netherlands%22&btnG=&as_sdt=1%2C5&as_sdtp=
161	http://127.0.0.1:8000/scholar_012.html	15	Direct mass spectrometric measurement of gases in peat cores	http://onlinelibrary.wiley.com/doi/10.1111/j.1574-6941.1994.tb00070.x/full	J Benstead, D Lloyd	FEMS microbiology ecology	1994	Wiley Online Library	Black	... 500 1000 1500 2000 2500 Dissolved carbon dioxide (pM ... probe through A: a hollow; B: a hummock (o, dissolved O2; o, dissolved CH4; II, dissolved CO2). ... The CO 2 concentration in peat was never above 7% of saturation, whereas the methane concentrations were up to 23% of ...	59			http://scholar.google.co.uk/scholar?hl=en&q=%22Direct+mass+spectrometric+measurement+of+gases+in+peat+cores%22&btnG=&as_sdt=1%2C5&as_sdtp=
162	http://127.0.0.1:8000/scholar_012.html	15	Effects of a transient oxic period on mineralization of organic matter to CH4 and CO2 in anoxic peat incubations	http://www.tandfonline.com/doi/abs/10.1080/01490459809378086	M Öquist, I Sundh	Geomicrobiology Journal	1998		Black	Rates of organic matter mineralization in peatlands, and hence production of the greenhouse gases CH4 and CO2, are highly dependent on the distribution of oxygen in the peat. Using laboratory incubations of peat, we investigated the sensitivity of the anoxic ...	23			http://scholar.google.co.uk/scholar?hl=en&q=%22Effects+of+a+transient+oxic+period+on+mineralization+of+organic+matter+to+CH4+and+CO2+in+anoxic+peat+incubations%22&btnG=&as_sdt=1%2C5&as_sdtp=
163	http://127.0.0.1:8000/scholar_012.html	15	Large N2O emissions from cryoturbated peat soil in tundra	http://www.nature.com/ngeo/journal/v2/n3/abs/ngeo434.html	ME Repo, S Susiluoto, SE Lind, S Jokinen…	Nature …	2009	nature.com	Black	Abstract Nitrous oxide is a potent greenhouse gas whose concentration is increasing in the atmosphere 1. So far, the highest terrestrial nitrous oxide emissions have been measured in agricultural and tropical soils 2, 3, and nitrous oxide emissions from northern natural soils ...	58	http://www.nature.com/ngeo/journal/v2/n3/full/ngeo434.html		http://scholar.google.co.uk/scholar?hl=en&q=%22Large+N2O+emissions+from+cryoturbated+peat+soil+in+tundra%22&btnG=&as_sdt=1%2C5&as_sdtp=
164	http://127.0.0.1:8000/scholar_012.html	15	Short‐term effects of changing water table on N2O fluxes from peat monoliths from natural and drained boreal peatlands	http://onlinelibrary.wiley.com/doi/10.1046/j.1365-2486.1999.00217.x/full	K Regina, J Silvola, PJ Martikainen	Global Change Biology	1999	Wiley Online Library	Black	Abstract The effect of the water table on nitrous oxide (N 2 O) fluxes from peat profiles representing boreal peatlands of differing nutrient status was studied in the laboratory. Lowering of the water table in peat monoliths taken from two natural waterlogged ...	64	http://127.0.0.1:8000/scholar?q=info:T3nPxT2xsBAJ:scholar.google.com/&output=instlink&hl=en&as_sdt=0,5&scillfp=11436957454128294688&oi=lle		http://scholar.google.co.uk/scholar?hl=en&q=%22Short‐term+effects+of+changing+water+table+on+N2O+fluxes+from+peat+monoliths+from+natural+and+drained+boreal+peatlands%22&btnG=&as_sdt=1%2C5&as_sdtp=
165	http://127.0.0.1:8000/scholar_012.html	15	Land management as a factor controlling dissolved organic carbon release from upland peat soils 1: Spatial variation in DOC productivity	http://www.sciencedirect.com/science/article/pii/S0048969709002484	AR Yallop, B Clutterbuck	Science of the Total Environment	2009	Elsevier	Black	Abstract The importance of soil storage in global carbon cycling is well recognised and factors leading to increased losses from this pool may act as a positive feedback mechanism in global warming. Upland peat soils are usually assumed to serve as carbon sinks, there ...	67			http://scholar.google.co.uk/scholar?hl=en&q=%22Land+management+as+a+factor+controlling+dissolved+organic+carbon+release+from+upland+peat+soils+1:+Spatial+variation+in+DOC+productivity%22&btnG=&as_sdt=1%2C5&as_sdtp=
166	http://127.0.0.1:8000/scholar_012.html	15	Depth distribution of microbial production and oxidation of methane in northern boreal peatlands	http://link.springer.com/article/10.1007/BF00182409	I Sundh, M Nilsson , G Granberg, BH Svensson	Microbial Ecology	1994	Springer	Black	... A permanent reduction in the depth of the water table, however, will also result in enhanced degradation of older peat deposits as they are exposed to oxygen, and therefore in increased emissions of CO2, another greenhouse gas, to the atmosphere [2,38]. ...	123			http://scholar.google.co.uk/scholar?hl=en&q=%22Depth+distribution+of+microbial+production+and+oxidation+of+methane+in+northern+boreal+peatlands%22&btnG=&as_sdt=1%2C5&as_sdtp=
167	http://127.0.0.1:8000/scholar_012.html	15	The influence of maintenance energy and growth rate on the metabolic activity, morphology and conidiation of Penicillium chrysogenum	http://mic.sgmjournals.org/content/50/3/399.short	…, APJ Trinci, SJ Pirt, A Peat	Journal of General …	1968	Soc General Microbiol	Black	... Of the maintenance oxygen, 90% was equivalent to the carbon dioxide formed. The maintenance requirement for glucose and oxygen would thus appear to be primarily used as a source of energy. 26-2 Page 6. 404 RC RIGHELATO, APJ TRINCI, SJ PIRT AND A. PEAT ...	171	http://mic.sgmjournals.org/content/50/3/399.full.pdf		http://scholar.google.co.uk/scholar?hl=en&q=%22The+influence+of+maintenance+energy+and+growth+rate+on+the+metabolic+activity,+morphology+and+conidiation+of+Penicillium+chrysogenum%22&btnG=&as_sdt=1%2C5&as_sdtp=
168	http://127.0.0.1:8000/scholar_012.html	15	Effects of global change on the carbon balance of arctic plants and ecosystems	http://books.google.co.uk/books?hl=en&lr=&id=nVSDRA2biLkC&oi=fnd&pg=PA139&dq=peat+%22greenhouse+gas%22+OR+GHG+OR+CO2+OR+%22carbon+dioxide%22+OR+CH4+OR+N2O+OR+methane+OR+%22nitrous+oxide%22+OR+DOC+OR+carbon&ots=urIPH60adu&sig=FMb28QZfrZiHdT2n9qBsMujX3S4	WC Oechel , WD Billings	Arctic ecosystems in a changing …	1992		Book	... meadow was probably Eiiophorum vaginatum tussock, and although the peat produced was ... 7. Carbon Balance of Arctic Plants and Ecosystems 153 2. Carbon Dioxide Carbon dioxide alone causes ... Kummerow and Ellis, 1984) but not from elevated atmospheric CO2 (Billings et ...	202			http://scholar.google.co.uk/scholar?hl=en&q=%22Effects+of+global+change+on+the+carbon+balance+of+arctic+plants+and+ecosystems%22&btnG=&as_sdt=1%2C5&as_sdtp=
169	http://127.0.0.1:8000/scholar_012.html	15	Link between DOC in near surface peat and stream water in an upland catchment	http://www.sciencedirect.com/science/article/pii/S0048969707012016	JM Clark , SN Lane , PJ Chapman…	Science of the total …	2008	Elsevier	Black	Hydrologic transport of dissolved organic carbon (DOC) from peat soils may differ to organo- mineral soils in how they responded to changes in flow, because of differences in soil profile and hydrology. In well-drained organo-mineral soils, low flow is through the lower mineral ...	43			http://scholar.google.co.uk/scholar?hl=en&q=%22Link+between+DOC+in+near+surface+peat+and+stream+water+in+an+upland+catchment%22&btnG=&as_sdt=1%2C5&as_sdtp=
170	http://127.0.0.1:8000/scholar_012.html	15	Holocene peat and carbon accumulation rates in the southern taiga of western Siberia	http://www.sciencedirect.com/science/article/pii/S003358940300139X	W Borren, W Bleuten, ED Lapshina	Quaternary Research	2004	Elsevier	Black	Although recent studies have recognized peatlands as a sink for atmospheric CO2, little is known about the role of Siberian peatlands in the global carbon cycle. We have estimated the Holocene peat and carbon accumulation rate in the peatlands of the southern taiga ...	48			http://scholar.google.co.uk/scholar?hl=en&q=%22Holocene+peat+and+carbon+accumulation+rates+in+the+southern+taiga+of+western+Siberia%22&btnG=&as_sdt=1%2C5&as_sdtp=
171	http://127.0.0.1:8000/scholar_013.html	16	The impact of seasonal variations in DOC arising from a moorland peat catchment on coagulation with iron and aluminium salts	http://www.sciencedirect.com/science/article/pii/S0269749105004033	EL Sharp, SA Parsons, B Jefferson	Environmental pollution	2006	Elsevier	Black	Natural organic matter (NOM) is one of the main sources of environmental pollution to drinking water supplies in much of the UK and the US. Whilst traditional treatment with trivalent coagulants has proven a successful strategy in the past, operational problems are ...	68			http://scholar.google.co.uk/scholar?hl=en&q=%22The+impact+of+seasonal+variations+in+DOC+arising+from+a+moorland+peat+catchment+on+coagulation+with+iron+and+aluminium+salts%22&btnG=&as_sdt=1%2C5&as_sdtp=
172	http://127.0.0.1:8000/scholar_013.html	16	Greenhouse gas emissions from Canadian peat extraction, 1990-2000: A life-cycle analysis	http://www.bioone.org/doi/abs/10.1579/0044-7447-34.6.456	J Cleary, NT Roulet , TR Moore	AMBIO: A Journal of the Human …	2005	BioOne	Black	Abstract This study uses life-cycle analysis to examine the net greenhouse gas (GHG) emissions from the Canadian peat industry for the period 1990-2000. GHG exchange is estimated for land-use change, peat extraction and processing, transport to market, and ...	59	http://felix.geog.mcgill.ca/faculty/moore/Ambio_34_456.pdf		http://scholar.google.co.uk/scholar?hl=en&q=%22Greenhouse+gas+emissions+from+Canadian+peat+extraction,+1990-2000:+A+life-cycle+analysis%22&btnG=&as_sdt=1%2C5&as_sdtp=
173	http://127.0.0.1:8000/scholar_013.html	16	Nutritional controls on carbon dioxide and methane emission from〈 i〉 Carex〈/i〉-dominated peat soils	http://www.sciencedirect.com/science/article/pii/S0038071797000734	R Aerts , S Toet	Soil Biology and Biochemistry	1997	Elsevier	Black	Eutrophication of peatlands may have significant effects on emissions of carbon dioxide and methane. This study analyses the effects of nitrogen (28.7 mmol NH4+ N, N), phosphorus (1.78 mmol PO43− P, P) and glucose (2.79 mmol glucose, G) additions on CO2 and ...	59			http://scholar.google.co.uk/scholar?hl=en&q=%22Nutritional+controls+on+carbon+dioxide+and+methane+emission+from〈+i〉+Carex〈/i〉-dominated+peat+soils%22&btnG=&as_sdt=1%2C5&as_sdtp=
174	http://127.0.0.1:8000/scholar_013.html	16	The role of peat in Finnish greenhouse gas balances	http://inis.iaea.org/search/search.aspx?orig_q=RN:32001740	P Crill, K Hargreaves, A Korhola				Grey	Over the past, total annual greenhouse gas (GHG) emissions from Finland, not considering land use change, forestry or peatlands, have remained between 70 000 and 80 000 Gg of CO 2 equivalents. A large portion of which (84% in 1998) is from energy and energy ...	41			http://scholar.google.co.uk/scholar?hl=en&q=%22The+role+of+peat+in+Finnish+greenhouse+gas+balances%22&btnG=&as_sdt=1%2C5&as_sdtp=
175	http://127.0.0.1:8000/scholar_013.html	16	The role of bryophytes in carbon and nitrogen cycling	http://www.jstor.org/stable/3244721	MR Turetsky	Bryologist	2003	JSTOR	Black	... face in a Denmark lake, with deeper waters char- acterized by low temperatures, CO2 supersaturation, and ... Some DOC in peatlands is transported down- wards into the peat and can be ... hotspots, possibly leading to the production of trace gas such as carbon dioxide and nitrous ...	207	http://www.uoguelph.ca/~mrtlab/mrtlab/Publications_files/Turetsky2003.pdf		http://scholar.google.co.uk/scholar?hl=en&q=%22The+role+of+bryophytes+in+carbon+and+nitrogen+cycling%22&btnG=&as_sdt=1%2C5&as_sdtp=
176	http://127.0.0.1:8000/scholar_013.html	16	Increased decomposition of subsurface peat in Swedish raised bogs: are temperate peatlands still net sinks of carbon	http://pixelrauschen.de/wbmp/media/map01/map_1_3.pdf	LG Franzén	Mires and Peat	2006	pixelrauschen.de	Black	SUMMARY An increased rate of decomposition has been observed in a large number of raised bogs in southern Sweden and elsewhere since the 1970s. The effect is manifest as a discoloured and mucous subsurface peat layer, and there is associated subsidence of ...	39	http://pixelrauschen.de/wbmp/media/map01/map_1_3.pdf	[PDF]	http://scholar.google.co.uk/scholar?hl=en&q=%22Increased+decomposition+of+subsurface+peat+in+Swedish+raised+bogs:+are+temperate+peatlands+still+net+sinks+of+carbon%22&btnG=&as_sdt=1%2C5&as_sdtp=
177	http://127.0.0.1:8000/scholar_013.html	16	Relationships between enchytraeid worms (Oligochaeta), climate change, and the release of dissolved organic carbon from blanket peat in northern England	http://www.sciencedirect.com/science/article/pii/S0038071701002164	L Cole, RD Bardgett, P Ineson , JK Adamson	Soil Biology and …	2002	Elsevier	Black	Over a period of 1yr, we examined the dynamics of a community of enchytraeid worms in a blanket peat soil in relation to the prevailing climate and the release of dissolved organic carbon (DOC). Our objectives were two-fold: first, we aimed to establish whether there is a ...	60			http://scholar.google.co.uk/scholar?hl=en&q=%22Relationships+between+enchytraeid+worms+(Oligochaeta),+climate+change,+and+the+release+of+dissolved+organic+carbon+from+blanket+peat+in+northern+England%22&btnG=&as_sdt=1%2C5&as_sdtp=
178	http://127.0.0.1:8000/scholar_013.html	16	Production of dissolved organic carbon ( DOC ) and trihalomethane (THM) precursor from peat soils	http://www.sciencedirect.com/science/article/pii/S0043135403004378	AT Chow, KK Tanji, S Gao	Water research	2003	Elsevier	Black	Water passing through the Sacramento-San Joaquin Delta contains elevated concentrations of dissolved organic carbon (DOC) and trihalomethane (THM) precursor relative to upstream waters from the Sacramento River and the San Joaquin River. Drainage from agricultural ...	61	http://www.researchgate.net/publication/9078164_Production_of_dissolved_organic_carbon_(DOC)_and_trihalomethane_(THM)_precursor_from_peat_soils/file/79e4150e50960883be.pdf		http://scholar.google.co.uk/scholar?hl=en&q=%22Production+of+dissolved+organic+carbon+(+DOC+)+and+trihalomethane+(THM)+precursor+from+peat+soils%22&btnG=&as_sdt=1%2C5&as_sdtp=
179	http://127.0.0.1:8000/scholar_013.html	16	Methane production and carbon mineralisation of size and density fractions of peat soils	http://www.sciencedirect.com/science/article/pii/S0038071798001886	A Van den Pol-van Dasselaar, O Oenema	Soil Biology and Biochemistry	1999	Elsevier	Black	For the purpose of characterisation of soil organic matter breakdown, soil organic matter is often divided into different fractions, each with its own decomposition rate. Thus far, no attempts had been made to quantify the methane production capacity of individual soil ...	60	http://library.wur.nl/WebQuery/edepot/201574#page=57		http://scholar.google.co.uk/scholar?hl=en&q=%22Methane+production+and+carbon+mineralisation+of+size+and+density+fractions+of+peat+soils%22&btnG=&as_sdt=1%2C5&as_sdtp=
180	http://127.0.0.1:8000/scholar_013.html	16	Annual CO2 exchange of a peat field growing spring barley or perennial forage grass	http://onlinelibrary.wiley.com/doi/10.1029/2004JD004715/full	A Lohila, M Aurela, JP Tuovinen…	Journal of Geophysical …	2004	Wiley Online Library	Black	[1] We report on net ecosystem CO 2 exchange (NEE) measurements conducted with the eddy covariance method over agricultural peat soil in the 2-year period between October 2000 and October 2002. In 2001, spring barley and undersown grass were sown on the site. After ...	63	http://onlinelibrary.wiley.com/doi/10.1029/2004JD004715/full	[HTML]	http://scholar.google.co.uk/scholar?hl=en&q=%22Annual+CO2+exchange+of+a+peat+field+growing+spring+barley+or+perennial+forage+grass%22&btnG=&as_sdt=1%2C5&as_sdtp=
181	http://127.0.0.1:8000/scholar_015.html	17	Peatlands and the carbon cycle: from local processes to global implications–a synthesis	http://www.biogeosciences.net/5/1475/2008/bg-5-1475-2008.html	J Limpens , F Berendse, C Blodau, JG Canadell …	…	2008	biogeosciences.net	Black	... These mas- sive deposits are the legacy of peatlands acting as sinks of atmospheric carbon dioxide (CO2) for millennia; but they also illustrate the potential for large CO2 and methane ... The upper peat layer (about 5–40 cm) is un- saturated with water and oxic during ...	239	http://www.biogeosciences.net/5/1475/2008/bg-5-1475-2008.pdf		http://scholar.google.co.uk/scholar?hl=en&q=%22Peatlands+and+the+carbon+cycle:+from+local+processes+to+global+implications–a+synthesis%22&btnG=&as_sdt=1%2C5&as_sdtp=
182	http://127.0.0.1:8000/scholar_015.html	17	Carbon dynamics in a forested peatland in north-eastern Ontario, Canada	http://www.jstor.org/stable/2261385	DJ Charman , R Aravena, BG Warner	Journal of Ecology	1994	JSTOR	Black	... This may explain the occurrence of older carbon in CO2. ... The alternative to movement of carbon source material is that the gases produced from peat are dis ... most studies have con- centrated on to evaluate the contribution of peatlands to global 'greenhouse gas' concentrations. ...	92			http://scholar.google.co.uk/scholar?hl=en&q=%22Carbon+dynamics+in+a+forested+peatland+in+north-eastern+Ontario,+Canada%22&btnG=&as_sdt=1%2C5&as_sdtp=
183	http://127.0.0.1:8000/scholar_015.html	17	Contribution of nitrification and denitrification to N2O production in peat , clay and loamy sand soils under different soil moisture conditions	http://link.springer.com/article/10.1023/B:FRES.0000048475.81211.3c	M Pihlatie, E Syväsalo, A Simojoki, M Esala…	Nutrient Cycling in …	2004	Springer	Black	Abstract Agricultural soils are a significant source of nitrous oxide (N 2 O). Since mitigation of greenhouse gas emissions is needed in all sectors of society, it is important to identify the processes producing N 2 O and the factors affecting the production rates in agricultural ...	55	http://www.researchgate.net/publication/227198110_Contribution_of_nitrification_and_denitrification_to_N2O_production_in_peat_clay_and_loamy_sand_soils_under_different_soil_moisture_conditions/file/79e41503332e6d6263.pdf		http://scholar.google.co.uk/scholar?hl=en&q=%22Contribution+of+nitrification+and+denitrification+to+N2O+production+in+peat+,+clay+and+loamy+sand+soils+under+different+soil+moisture+conditions%22&btnG=&as_sdt=1%2C5&as_sdtp=
184	http://127.0.0.1:8000/scholar_015.html	17	An appraisal of global wetland area and its organic carbon stock	http://www.iisc.ernet.in/~currsci/jan102005/25.pdf	S Mitra, R Wassmann, PLG Vlek	Current Science	2005		Black	... Maltby and Immirzi5 398 (Adopted from 462 For 150 cm depth of peat depth Armentano and Menges36 ... Greenhouse gas emission and carbon sequestration ... Fourthly, wetland soils produce the GHG methane, which is regularly emitted to the atmosphere even in the absence of ...	140	http://www.iisc.ernet.in/~currsci/jan102005/25.pdf	[PDF]	http://scholar.google.co.uk/scholar?hl=en&q=%22An+appraisal+of+global+wetland+area+and+its+organic+carbon+stock%22&btnG=&as_sdt=1%2C5&as_sdtp=
185	http://127.0.0.1:8000/scholar_015.html	17	Holocene lateral expansion, peat growth and carbon accumulation on Haukkasuo, a raised bog in southeastern Finland	http://onlinelibrary.wiley.com/doi/10.1111/j.1502-3885.1997.tb00647.x/abstract	M MÄUKILÄU	Boreas	1997	Wiley Online Library	Black	Paludification intensity and peat deposition on Haukkasuo bog in southeastern Finland were studied with peat stratigraphic investigations by taking 79 samples for I4C carbon dating and 164 volumetric samples. Peat formation of Haukkasuo, a concentric raised bog, began ...	61			http://scholar.google.co.uk/scholar?hl=en&q=%22Holocene+lateral+expansion,+peat+growth+and+carbon+accumulation+on+Haukkasuo,+a+raised+bog+in+southeastern+Finland%22&btnG=&as_sdt=1%2C5&as_sdtp=
186	http://127.0.0.1:8000/scholar_015.html	17	Dissolved organic carbon concentrations and compositions, and trihalomethane formation potentials in waters from agricultural peat soils, Sacramento-San …	http://books.google.co.uk/books?hl=en&lr=&id=NNMnYg_kybEC&oi=fnd&pg=PA1&dq=peat+%22greenhouse+gas%22+OR+GHG+OR+CO2+OR+%22carbon+dioxide%22+OR+CH4+OR+N2O+OR+methane+OR+%22nitrous+oxide%22+OR+DOC+OR+carbon&ots=Qk8LPC9xsy&sig=JOujZP-7kfxk9hEAkQDRiOxhRa8	R Fujii				Book	ABSTRACT Water exported from the Sacramento-San Joaquin River delta (Delta) is an important drinking-water source for more than 20 million people in California. At times, this water contains elevated concentrations of dissolved organic carbon and bromide, and ...	65	http://books.google.co.uk/books?hl=en&lr=&id=NNMnYg_kybEC&oi=fnd&pg=PA1&dq=peat+%22greenhouse+gas%22+OR+GHG+OR+CO2+OR+%22carbon+dioxide%22+OR+CH4+OR+N2O+OR+methane+OR+%22nitrous+oxide%22+OR+DOC+OR+carbon&ots=Qk8LPC9xsy&sig=JOujZP-7kfxk9hEAkQDRiOxhRa8	[BOOK]	http://scholar.google.co.uk/scholar?hl=en&q=%22Dissolved+organic+carbon+concentrations+and+compositions,+and+trihalomethane+formation+potentials+in+waters+from+agricultural+peat+soils,+Sacramento-San+…%22&btnG=&as_sdt=1%2C5&as_sdtp=
187	http://127.0.0.1:8000/scholar_015.html	17	CO2 emissions from forest loss	http://www.nature.com/ngeo/journal/v2/n11/abs/ngeo671.html	GR Van der Werf , DC Morton, RS DeFries …	Nature …	2009	nature.com	Black	... is revised downwards, but tropical peatlands emerge as a notable carbon dioxide source. ... gas emissions 1 . Deforestation and forest degradation contribute to atmospheric greenhouse-gas emissions through ... Yet even this lower value of the contribution from peat fires highlights ...	507	http://www.nature.com/ngeo/journal/v2/n11/full/ngeo671.html		http://scholar.google.co.uk/scholar?hl=en&q=%22CO2+emissions+from+forest+loss%22&btnG=&as_sdt=1%2C5&as_sdtp=
188	http://127.0.0.1:8000/scholar_015.html	17	Temperature sensitivity of soil carbon decomposition and feedbacks to climate change	http://www.nature.com/nature/journal/v440/n7081/abs/nature04514.html	EA Davidson , IA Janssens	Nature	2006	nature.com	Black	... 1). Inputs are primarily from leaf and root detritus. Outputs are dominated by the efflux of carbon dioxide (CO 2 ) from the soil surface, although methane (CH 4 ) efflux and hydrologic leaching of dissolved and ... This inhibition is quickly reversible once peat becomes aerobic. ...	1893	http://www.nature.com/nature/journal/v440/n7081/full/nature04514.html		http://scholar.google.co.uk/scholar?hl=en&q=%22Temperature+sensitivity+of+soil+carbon+decomposition+and+feedbacks+to+climate+change%22&btnG=&as_sdt=1%2C5&as_sdtp=
189	http://127.0.0.1:8000/scholar_015.html	17	Factors affecting methane production in peat soils		BH Svensson, I Sundh	Suo			Black		64		[CITATION]	http://scholar.google.co.uk/scholar?hl=en&q=%22Factors+affecting+methane+production+in+peat+soils%22&btnG=&as_sdt=1%2C5&as_sdtp=
190	http://127.0.0.1:8000/scholar_015.html	17	Carbon flow in a tundra stream ecosystem	http://www.nrcresearchpress.com/doi/abs/10.1139/f86-156	BJ Peterson, JE Hobbie…	Canadian Journal of …	1986	NRC Research Press	Black	... the collections for the pol and riffle areas and obtained an overall mean value of 10 g C m-2. The patchy distribution appeared to be due mainly to the fact that large chunks of peat were more abundant ... For comparison, the standing stocks of organic carbon as DOC, BOC, and ...	96			http://scholar.google.co.uk/scholar?hl=en&q=%22Carbon+flow+in+a+tundra+stream+ecosystem%22&btnG=&as_sdt=1%2C5&as_sdtp=
191	http://127.0.0.1:8000/scholar_016.html	18	Onset and rate of peat and carbon accumulation in four domed ombrogenous peat deposits, Indonesia		SG Neuzil	Biodiversity and Sustainability of …,Samara Publishing	1997		Book chapter		61		[CITATION]	http://scholar.google.co.uk/scholar?hl=en&q=%22Onset+and+rate+of+peat+and+carbon+accumulation+in+four+domed+ombrogenous+peat+deposits,+Indonesia%22&btnG=&as_sdt=1%2C5&as_sdtp=
192	http://127.0.0.1:8000/scholar_016.html	18	Temperature and N fertilization effects on methane oxidation in a drained peatland soil	http://www.sciencedirect.com/science/article/pii/0038071794902143	PM Crill, PJ Martikainen, H Nykanen…	Soil Biology and …	1994	Elsevier	Black	... The nitrogen fertilizers had also decreased the CH4 uptake in situ. ... Methane production and consumption in temperate and subarctic peat soils: response to temperature and pH. ... The influence of water table levels on methane and carbon dioxide emissions from peatland soils. ...	188			http://scholar.google.co.uk/scholar?hl=en&q=%22Temperature+and+N+fertilization+effects+on+methane+oxidation+in+a+drained+peatland+soil%22&btnG=&as_sdt=1%2C5&as_sdtp=
193	http://127.0.0.1:8000/scholar_016.html	18	Fluxes of dissolved carbon dioxide and inorganic carbon from an upland peat catchment: implications for soil respiration	http://link.springer.com/article/10.1007/s10533-004-1717-2	F Worrall, T Burt, J Adamson	Biogeochemistry	2005	Springer	Black	Abstract. This study uses long-term water chemistry records for a circum-neutral peat stream to reconstruct a 7-year record of dissolved CO 2 and DIC flux from the catchment. Combining catchment flux with a knowledge of in-stream metabolism and gas evasion from the ...	54	http://127.0.0.1:8000/scholar?q=info:Ojf_Htt_nlsJ:scholar.google.com/&output=instlink&hl=en&as_sdt=0,5&scillfp=12688670683066587884&oi=lle		http://scholar.google.co.uk/scholar?hl=en&q=%22Fluxes+of+dissolved+carbon+dioxide+and+inorganic+carbon+from+an+upland+peat+catchment:+implications+for+soil+respiration%22&btnG=&as_sdt=1%2C5&as_sdtp=
194	http://127.0.0.1:8000/scholar_016.html	18	Methane emissions from wet grasslands on peat soil in a nature preserve	http://link.springer.com/article/10.1007/BF00992979	A Van den Pol-van Dasselaar, ML Van Beusichem…	Biogeochemistry	1999	Springer	Black	Abstract The area of wet grasslands on peat soil in the Netherlands is slowly increasing at the expense of drained, agriculturally used grasslands. This study aimed (i) to assess the contribution of wet grasslands on peat soil to methane (CH 4) emissions, and (ii) to ...	49			http://scholar.google.co.uk/scholar?hl=en&q=%22Methane+emissions+from+wet+grasslands+on+peat+soil+in+a+nature+preserve%22&btnG=&as_sdt=1%2C5&as_sdtp=
195	http://127.0.0.1:8000/scholar_016.html	18	Variation in 14C age of macrofossils and different fractions of minute peat samples dated by AMS	http://hol.sagepub.com/content/11/5/579.short	M Nilsson, M Klarqvist, E Bohlin, G Possnert	The Holocene	2001		Black	... Radiocarbon evidence for the substrates supporting methane formation within northern Minnesota peatlands. Geochimica et Cosmochimica Acta 59, 3663–68. Charman, DJ, Aravena, R., Bryant, CL and Harkness, DD 1999: Carbon isotopes in peat, DOC, CO2 and CH4 in a ...	70	http://127.0.0.1:8000/scholar?q=info:8fsxxMKDGE4J:scholar.google.com/&output=instlink&hl=en&as_sdt=0,5&scillfp=10946101063729775054&oi=lle		http://scholar.google.co.uk/scholar?hl=en&q=%22Variation+in+14C+age+of+macrofossils+and+different+fractions+of+minute+peat+samples+dated+by+AMS%22&btnG=&as_sdt=1%2C5&as_sdtp=
196	http://127.0.0.1:8000/scholar_016.html	18	Runoff generation and water table fluctuations in blanket peat : evidence from UK data spanning the dry summer of 1995	http://www.sciencedirect.com/science/article/pii/S0022169499000852	MG Evans, TP Burt, J Holden , JK Adamson	Journal of Hydrology	1999	Elsevier	Black	... Cover image Cover image. Runoff generation and water table fluctuations in blanket peat: evidence from UK data spanning the dry summer of 1995. ... 1. Introduction. The headwaters of many major UK rivers drain areas of upland blanket peat. ...	165			http://scholar.google.co.uk/scholar?hl=en&q=%22Runoff+generation+and+water+table+fluctuations+in+blanket+peat+:+evidence+from+UK+data+spanning+the+dry+summer+of+1995%22&btnG=&as_sdt=1%2C5&as_sdtp=
197	http://127.0.0.1:8000/scholar_016.html	18	Methane flux: water table relations in northern wetlands	http://onlinelibrary.wiley.com/doi/10.1029/93GL00208/full	TR Moore, NT Roulet	Geophysical Research Letters	1993	Wiley Online Library	Black	... Glenn, S., A. Heyes and TR Moore, Carbon dioxide and methane fluxes from drained peat soils, southern ... Hamilton, JD, CA Kelly, JWM Rudd and RH Hesslein, Flux to the atmosphere of CH4 and CO2 from wetland ponds in the Hudson Bay Lowland, J. Geophys. ...	223			http://scholar.google.co.uk/scholar?hl=en&q=%22Methane+flux:+water+table+relations+in+northern+wetlands%22&btnG=&as_sdt=1%2C5&as_sdtp=
198	http://127.0.0.1:8000/scholar_016.html	18	Methane oxidation, production, and emission at contrasting sites in a boreal bog	http://www.tandfonline.com/doi/abs/10.1080/01490450050121198	SC Whalen, WS Reeburgh	Geomicrobiology Journal	2000		Black	... The relative importance of CH4 as a greenhouse gas is expected to increase, given that, on a mass basis, CH4 has a ... that at LB2 (69 mg of CH4 m¡ 2 d¡ 1) indicated net CH4 emission from the peat surface to ... In contrast to CH4, uxes of CO2 were reasonably similar between sites ...	61	http://127.0.0.1:8000/scholar?q=info:w-3ZK0RchBgJ:scholar.google.com/&output=instlink&hl=en&as_sdt=0,5&scillfp=7201722442975413898&oi=lle		http://scholar.google.co.uk/scholar?hl=en&q=%22Methane+oxidation,+production,+and+emission+at+contrasting+sites+in+a+boreal+bog%22&btnG=&as_sdt=1%2C5&as_sdtp=
199	http://127.0.0.1:8000/scholar_016.html	18	Northern fens: methane flux and climatic change	http://onlinelibrary.wiley.com/doi/10.1034/j.1600-0889.1992.t01-1-00002.x/abstract	N Roulet , TIM Moore, J Bubier, P Lafleur	Tellus B	1992	Wiley Online Library	Black	... The solid line indicates the best fit (CH4= 116.7e009im"; г2 = 0.38; 5у = 0.71) developed from the SchefTerville data for the ... Physical properties of peat as related to degree of decomposition. ... Sensitivity of soil moisture to doubling of carbon dioxide in climate model experiments. ...	248	http://onlinelibrary.wiley.com/doi/10.1034/j.1600-0889.1992.t01-1-00002.x/pdf		http://scholar.google.co.uk/scholar?hl=en&q=%22Northern+fens:+methane+flux+and+climatic+change%22&btnG=&as_sdt=1%2C5&as_sdtp=
200	http://127.0.0.1:8000/scholar_016.html	18	The rate of and controls upon DOC loss in a peat catchment	http://www.sciencedirect.com/science/article/pii/S002216940500394X	F Worrall, TP Burt, J Adamson	Journal of Hydrology	2006	Elsevier	Black	This study uses detailed monitoring of a peat catchment to estimate the amount of DOC loss within a stream. The study compares DOC concentrations and specific absorbances (absorbance at 400nm per concentration of DOC) of shallow and deep soil waters with ...	55			http://scholar.google.co.uk/scholar?hl=en&q=%22The+rate+of+and+controls+upon+DOC+loss+in+a+peat+catchment%22&btnG=&as_sdt=1%2C5&as_sdtp=
201	http://127.0.0.1:8000/scholar_017.html	19	Peat carbon in arctic Alaska: accumulating or ablating		D Schell	Eos			Black		5		[CITATION]	http://scholar.google.co.uk/scholar?hl=en&q=%22Peat+carbon+in+arctic+Alaska:+accumulating+or+ablating%22&btnG=&as_sdt=1%2C5&as_sdtp=
202	http://127.0.0.1:8000/scholar_017.html	19	Sorption and desorption rates of carbon tetrachloride and 1, 2-dichlorobenzene to three organobentonites and a natural peat soil	http://pubs.acs.org/doi/abs/10.1021/es9800683	JJ Deitsch, JA Smith , MB Arnold…	Environmental science & …	1998	ACS Publications	Black	The sorption and desorption rates of carbon tetrachloride (CCl4) and 1, 2-dichlorobenzene (1, 2-DCB) to and from three organobentonites of varying alkyl-chain length were quantified. The effects of solute structure, organobentonite structure, and solute-sorbent contact time ...	56	http://lib3.dss.go.th/fulltext/Journal/Environ%20Sci.%20Technology1998-2001/1998/no.20/20,1998%20vol.32,no.20,p3169-3177.pdf		http://scholar.google.co.uk/scholar?hl=en&q=%22Sorption+and+desorption+rates+of+carbon+tetrachloride+and+1,+2-dichlorobenzene+to+three+organobentonites+and+a+natural+peat+soil%22&btnG=&as_sdt=1%2C5&as_sdtp=
203	http://127.0.0.1:8000/scholar_017.html	19	Eroding blanket peat catchments: global and local implications of upland organic sediment budgets	http://www.sciencedirect.com/science/article/pii/S0169555X06000687	M Evans, J Warburton, J Yang	Geomorphology	2006	Elsevier	Black	... DOC is fluvial dissolved organic carbon flux, POC is fluvial particulate organic carbon flux ... Upper North Grain the particulate carbon flux is the largest component of fluvial carbon loss ... The fluvial flux of particulate peat is at least equivalent to the net gaseous carbon flux from intact ...	87			http://scholar.google.co.uk/scholar?hl=en&q=%22Eroding+blanket+peat+catchments:+global+and+local+implications+of+upland+organic+sediment+budgets%22&btnG=&as_sdt=1%2C5&as_sdtp=
204	http://127.0.0.1:8000/scholar_017.html	19	Subsidence rates and carbon loss in peat soils following conversion to pasture in the Waikato Region, New Zealand	http://onlinelibrary.wiley.com/doi/10.1111/j.1475-2743.2002.tb00225.x/abstract	LA Schipper , M McLeod	Soil Use and Management	2002	Wiley Online Library	Black	Abstract. Drainage of peat soils for agriculture can lead to large carbon losses due to oxidation of peat. We estimated peat subsidence rates and total carbon losses, due to 40 years of dairy farming on a former peat bog, by measuring the thickness of peat and total ...	36			http://scholar.google.co.uk/scholar?hl=en&q=%22Subsidence+rates+and+carbon+loss+in+peat+soils+following+conversion+to+pasture+in+the+Waikato+Region,+New+Zealand%22&btnG=&as_sdt=1%2C5&as_sdtp=
205	http://127.0.0.1:8000/scholar_017.html	19	Nitrous oxide production, its source and distribution in urine patches on grassland on peat soil	http://link.springer.com/article/10.1023/A:1004285221368	JG Koops, ML Van Beusichem, O Oenema	Plant and Soil	1997	Springer	Black	Abstract Urine patches are considered to be important sites for nitrous oxide (N 2 O) production through nitrification and denitrification due to their high concentration of nitrogen (N). The aim of the present study was to determine the microbial source and size of ...	45			http://scholar.google.co.uk/scholar?hl=en&q=%22Nitrous+oxide+production,+its+source+and+distribution+in+urine+patches+on+grassland+on+peat+soil%22&btnG=&as_sdt=1%2C5&as_sdtp=
206	http://127.0.0.1:8000/scholar_017.html	19	Spatial and temporal variations of dissolved gases ( CH4 , CO2 , and O2) in peat cores	http://link.springer.com/article/10.1007/BF00175075	J Benstead, D Lloyd	Microbial ecology	1996	Springer	Black	Abstract Spatial and temporal variations in the concentrations of dissolved gases (CH 4, CO 2, and O 2) in peat cores were studied using membrane inlet mass spectrometry (MIMS). Variations in vertical gas profiles were observed between random peat cores taken from ...	29			http://scholar.google.co.uk/scholar?hl=en&q=%22Spatial+and+temporal+variations+of+dissolved+gases+(+CH4+,+CO2+,+and+O2)+in+peat+cores%22&btnG=&as_sdt=1%2C5&as_sdtp=
207	http://127.0.0.1:8000/scholar_017.html	19	Effect of peatland drainage, harvesting, and restoration on atmospheric water and carbon exchange	http://www.tandfonline.com/doi/abs/10.1080/02723646.2000.10642719	JM Waddington , JS Price	Physical Geography	2000		Black	... Greenhouse Gas Exchange ... The loss of water also decreases the volumetric soil moisture of the peat, especially in the upper 5 cm. Compounding this is the loss Page 12. 444 WADDINGTON AND PRICE ... cCH4 multiplier for CO2 equivalents was 21. ...	79			http://scholar.google.co.uk/scholar?hl=en&q=%22Effect+of+peatland+drainage,+harvesting,+and+restoration+on+atmospheric+water+and+carbon+exchange%22&btnG=&as_sdt=1%2C5&as_sdtp=
208	http://127.0.0.1:8000/scholar_017.html	19	Molecular ecological analysis of methanogens and methanotrophs in blanket bog peat	http://link.springer.com/article/10.1007/s002489900172	IR McDonald , M Upton, G Hall, RW Pickup, C Edwards…	Microbial ecology	1999	Springer	Black	... greenhouse gas, methane is 20 times more active than car- bon dioxide and consequently, with current ... headspace (0.5 ml) were removed at regular intervals for analysis of CH4 concentration. The sections of peat were then removed from the incubation vessel to measure their ...	71	http://www.researchgate.net/publication/12758567_Molecular_Ecological_Analysis_of_Methanogens_and_Methanotrophs_in_Blanket_Bog_Peat/file/60b7d51e628f6c62b3.pdf		http://scholar.google.co.uk/scholar?hl=en&q=%22Molecular+ecological+analysis+of+methanogens+and+methanotrophs+in+blanket+bog+peat%22&btnG=&as_sdt=1%2C5&as_sdtp=
209	http://127.0.0.1:8000/scholar_017.html	19	Global fire emissions and the contribution of deforestation, savanna, forest, agricultural, and peat fires (1997–2009)	http://www.atmos-chem-phys.net/10/11707/2010/	GR van der Werf , JT Randerson…	Atmospheric …	2010		Black	... less important but a breakdown into categories is useful to better characterize non-CO2 anthropogenic climate ... all fires contribute to emissions of methane (CH4), but the amount of CH4 released per ... Peat fires, for example, may emit almost ten times more CH4 per unit biomass ...	604	http://www.atmos-chem-phys.net/10/11707/2010/acp-10-11707-2010.pdf		http://scholar.google.co.uk/scholar?hl=en&q=%22Global+fire+emissions+and+the+contribution+of+deforestation,+savanna,+forest,+agricultural,+and+peat+fires+(1997–2009)%22&btnG=&as_sdt=1%2C5&as_sdtp=
210	http://127.0.0.1:8000/scholar_017.html	19	Biological activity in some natural and drained peat soils with special reference to oxidation-reduction conditions.	http://helda.helsinki.fi/handle/1975/9141	E Lähde				Black	... Already in the nineteenth century scientists used carbon dioxide release as an indicator of soil metab- olism (HABER 1959) and rapidity of de- composition of organic matter in peat soils (l(|ss1.1No and Fuzlscnisn 1891). Since ...	64	http://helda.helsinki.fi/bitstream/handle/1975/9141/Vol.094.pdf?sequence=3	[CITATION]	http://scholar.google.co.uk/scholar?hl=en&q=%22Biological+activity+in+some+natural+and+drained+peat+soils+with+special+reference+to+oxidation-reduction+conditions.%22&btnG=&as_sdt=1%2C5&as_sdtp=
211	http://127.0.0.1:8000/scholar_018.html	20	Exchange of greenhouse gases between soil and atmosphere: interactions of soil physical factors and biological processes	http://onlinelibrary.wiley.com/doi/10.1046/j.1351-0754.2003.0567.x/full	KA Smith, T Ball, F Conen, KE Dobbie…	European Journal of …	2003	Wiley Online Library	Black	... The most important individual greenhouse gas is carbon dioxide, CO 2 , but substantial contributions to ... Carbon dioxide (CO 2 ) emissions resulting from respiration in soil and vegetation are the ... (1997) also reported CH 4 concentrations in the water in saturated peat 6000 times ...	416	http://atmo.tamu.edu/class/geos489/lecture6/soiltracegasrev.pdf		http://scholar.google.co.uk/scholar?hl=en&q=%22Exchange+of+greenhouse+gases+between+soil+and+atmosphere:+interactions+of+soil+physical+factors+and+biological+processes%22&btnG=&as_sdt=1%2C5&as_sdtp=
212	http://127.0.0.1:8000/scholar_018.html	20	Relocation of carbon from decaying litter in drained peat soils	http://www.sciencedirect.com/science/article/pii/S0038071797002332	T Domisch, L Finér, M Karsisto, R Laiho …	Soil Biology and …	1998	Elsevier	Black	Recent findings have indicated that the carbon density and store in peat soil may increase after drainage for forestry, even if soil respiration has clearly increased. This is caused by the increased organic C flow from tree stands into soil and consequent retention in the peat ...	31			http://scholar.google.co.uk/scholar?hl=en&q=%22Relocation+of+carbon+from+decaying+litter+in+drained+peat+soils%22&btnG=&as_sdt=1%2C5&as_sdtp=
213	http://127.0.0.1:8000/scholar_018.html	20	Nitrogen loss from grassland on peat soils through nitrous oxide production	http://link.springer.com/article/10.1023/A:1004252012290	JG Koops, ML Van Beusichem, O Oenema	Plant and Soil	1997	Springer	Black	Abstract Nitrous oxide (N 2 O) in soils is produced through nitrification and denitrification. The N 2 O produced is considered as a nitrogen (N) loss because it will most likely escape from the soil to the atmosphere as N 2 O or N 2. Aim of the study was to quantify N 2 O ...	42			http://scholar.google.co.uk/scholar?hl=en&q=%22Nitrogen+loss+from+grassland+on+peat+soils+through+nitrous+oxide+production%22&btnG=&as_sdt=1%2C5&as_sdtp=
214	http://127.0.0.1:8000/scholar_018.html	20	Fluxes of N2O , CH4 and CO2 on afforested boreal agricultural soils	http://link.springer.com/article/10.1023/A:1010372914805	M Maljanen, J Hytönen , PJ Martikainen	Plant and soil	2001	Springer	Black	... Abstract After drainage of natural boreal peatlands, the decomposition of organic matter increases and peat soil may turn into a net source of CO2 and N2O ... Afforestation is a potential mitigation strategy to reduce greenhouse gas emission from organic agricultural soils. ...	87			http://scholar.google.co.uk/scholar?hl=en&q=%22Fluxes+of+N2O+,+CH4+and+CO2+on+afforested+boreal+agricultural+soils%22&btnG=&as_sdt=1%2C5&as_sdtp=
215	http://127.0.0.1:8000/scholar_018.html	20	Long‐term effects of climate change on vegetation and carbon dynamics in peat bogs	http://onlinelibrary.wiley.com/doi/10.3170/2008-8-18368/full	MMPD Heijmans, D Mauquoy, B Geel …	Journal of Vegetation …	2008	Wiley Online Library	Black	Methods: We developed a bog ecosystem model that includes vegetation, carbon, nitrogen and water dynamics. Two groups of vascular plant species and three groups of Sphagnum species compete with each other for light and nitrogen. The model was tested by ...	46	http://dare.uva.nl/document/127283		http://scholar.google.co.uk/scholar?hl=en&q=%22Long‐term+effects+of+climate+change+on+vegetation+and+carbon+dynamics+in+peat+bogs%22&btnG=&as_sdt=1%2C5&as_sdtp=
216	http://127.0.0.1:8000/scholar_018.html	20	High sensitivity of peat decomposition to climate change through water-table feedback	http://www.nature.com/ngeo/journal/v1/n11/abs/ngeo331.html	T Ise , AL Dunn , SC Wofsy, PR Moorcroft	Nature Geoscience	2008	nature.com	Black	... Zoltai, SC Palsas and peat plateaus in central Manitoba and Saskatchewan. Can. J. Forest Res. ... RESEARCH. Effect of a lowered water table on nitrous oxide fluxes from northern peatlands ... Export of dissolved organic carbon from peatlands under elevated carbon dioxide levels ...	135	http://www.nature.com/ngeo/journal/v1/n11/full/ngeo331.html		http://scholar.google.co.uk/scholar?hl=en&q=%22High+sensitivity+of+peat+decomposition+to+climate+change+through+water-table+feedback%22&btnG=&as_sdt=1%2C5&as_sdtp=
217	http://127.0.0.1:8000/scholar_018.html	20	Feedback control of the rate of peat formation	http://rspb.royalsocietypublishing.org/content/268/1473/1315.short	LR Belyea , RS Clymo	Proceedings of the Royal …	2001		Black	... and vertical height of microforms because the balance between the uptake of carbon dioxide and the ... Clymo, RS & Reddaway, EJF 1971 Productivity of Sphagnum (bog-moss) and peat accumulation. ... RH & Roulet, NT 1994 Flux to the atmosphere of CH4 and CO2 from wetland ...	175	http://www.ncbi.nlm.nih.gov/pmc/articles/PMC1088743/pdf/PB011315.pdf		http://scholar.google.co.uk/scholar?hl=en&q=%22Feedback+control+of+the+rate+of+peat+formation%22&btnG=&as_sdt=1%2C5&as_sdtp=
218	http://127.0.0.1:8000/scholar_018.html	20	Microbial biomass carbon and readily mineralized nitrogen in peat and forest humus		BL Williams, GP Sparling	Soil Biology and Biochemistry	1988	Pergamon	Black		44		[CITATION]	http://scholar.google.co.uk/scholar?hl=en&q=%22Microbial+biomass+carbon+and+readily+mineralized+nitrogen+in+peat+and+forest+humus%22&btnG=&as_sdt=1%2C5&as_sdtp=
219	http://127.0.0.1:8000/scholar_018.html	20	CO2 dependence of photosynthesis in certain forest and peat mosses and simulated photosynthesis at various actual and hypothetical CO2 …	http://agris.fao.org/agris-search/search.do?recordID=US201302034152	J Silvola	Lindbergia: a journal of bryology	1985		Black	... CO2 dependence of photosynthesis in certain forest and peat mosses and simulated photosynthesis at various actual and hypothetical CO2 concentrations [1985]. ...	53		[CITATION]	http://scholar.google.co.uk/scholar?hl=en&q=%22CO2+dependence+of+photosynthesis+in+certain+forest+and+peat+mosses+and+simulated+photosynthesis+at+various+actual+and+hypothetical+CO2+…%22&btnG=&as_sdt=1%2C5&as_sdtp=
220	http://127.0.0.1:8000/scholar_018.html	20	Climate-driven flushing of pore water in peatlands	http://www.ldeo.columbia.edu/~sanpisa/wetlands/reading/seigal1995.pdf	DI Siegel, AS Reeve, PH Glaser, EA Romanowicz	Nature	1995		Black	... peats that now store 150-450 Pg of carbon2-6 (1 Pg is 10'5 g). Most of the carbon in these peatlands is mineral- ized very slowly to carbon dioxide and methane because micro- bial metabolism is restricted to anaerobic pathways in waterlogged and anoxic peat-1-7,8. If fluid ...	106	http://www.ldeo.columbia.edu/~sanpisa/wetlands/reading/seigal1995.pdf	[PDF]	http://scholar.google.co.uk/scholar?hl=en&q=%22Climate-driven+flushing+of+pore+water+in+peatlands%22&btnG=&as_sdt=1%2C5&as_sdtp=
221	http://127.0.0.1:8000/scholar_020.html	22	Are hydroelectric reservoirs significant sources of greenhouse gases	http://inis.iaea.org/search/search.aspx?orig_q=RN:24074728	JWM Rudd, RE Hecky, R Harris, CA Kelly				Black	... 4 ) are produced during bacterial decomposition of flooded peat and forest ... are sites of intense microbial decomposition and greenhouse-gas production when ... AIR POLLUTION, AIR-WATER INTERACTIONS, CANADA, CARBON DIOXIDE, DECOMPOSITION, ENVIRONMENTAL ...	172			http://scholar.google.co.uk/scholar?hl=en&q=%22Are+hydroelectric+reservoirs+significant+sources+of+greenhouse+gases%22&btnG=&as_sdt=1%2C5&as_sdtp=
222	http://127.0.0.1:8000/scholar_020.html	22	Uncertainty in predicting the effect of climatic change on the carbon cycling of Canadian peatlands	http://link.springer.com/article/10.1023/A:1005408719297	TR Moore, NT Roulet , JM Waddington	Climatic change	1998	Springer	Black	... of current fossil-fuel combustion and represents a reduction in atmospheric CO2 concentration of ... qualilﬂ [comrmmim I W7: Ea PAR] [plant Imnsport, WI T peat quality] surface ... conditions within wetland profiles stimulates the production of methane (CH4), another greenhouse gas. ...	303			http://scholar.google.co.uk/scholar?hl=en&q=%22Uncertainty+in+predicting+the+effect+of+climatic+change+on+the+carbon+cycling+of+Canadian+peatlands%22&btnG=&as_sdt=1%2C5&as_sdtp=
223	http://127.0.0.1:8000/scholar_020.html	22	Carbon mineralization in pristine and phosphorus-enriched peat soils of the Florida Everglades.	http://journals.lww.com/soilsci/Abstract/1995/02000/CARBON_MINERALIZATION_IN_PRISTINE_AND.8.aspx	JA Amador , RD Jones	Soil Science	1995		Black	Abstract Differences in microbial mineralization of added organic carbon were assessed in pristine (0.231 g total P (TP) kg-1) and P-polluted (1.473 g total P kg-1) neutral peat soils from Everglades National Park, Florida. Kinetic parameters associated with CO2 and CH4 ...	45			http://scholar.google.co.uk/scholar?hl=en&q=%22Carbon+mineralization+in+pristine+and+phosphorus-enriched+peat+soils+of+the+Florida+Everglades.%22&btnG=&as_sdt=1%2C5&as_sdtp=
224	http://127.0.0.1:8000/scholar_020.html	22	Arctic tundra: a source or sink for atmospheric carbon dioxide in a changing environment?	http://link.springer.com/article/10.1007/BF00377129	WD Billings, JO Luken, DA Mortensen, KM Peterson	Oecologia	1982	Springer	Black	... At the higher tempera- ture the tundra ecosystem could become a net carbon dioxide source under the ... due to higher evapotranspiration in a warmer climate could accentuate the postulated CO2 source effect by increasing aerobic microbial and root respiration in the peat. ...	310			http://scholar.google.co.uk/scholar?hl=en&q=%22Arctic+tundra:+a+source+or+sink+for+atmospheric+carbon+dioxide+in+a+changing+environment?%22&btnG=&as_sdt=1%2C5&as_sdtp=
225	http://127.0.0.1:8000/scholar_020.html	22	Effect of forest drainage on the peat bulk density of pine mires in Finland	http://www.nrcresearchpress.com/doi/abs/10.1139/x97-206	K Minkkinen, J Laine	Canadian Journal of Forest Research	1998	NRC Research Press	Black	... The observed differ- ence (1.6%) alone equals 1.6 kg C⋅m–2 in a 100-cm layer of peat with Db of 100 kg⋅m–3, more than the reported changes in peat carbon balance after forest drainage (Sakovets and Ger- manova 1992; Laine and Minkkinen 1996; Laine et al. 1996). ...	58			http://scholar.google.co.uk/scholar?hl=en&q=%22Effect+of+forest+drainage+on+the+peat+bulk+density+of+pine+mires+in+Finland%22&btnG=&as_sdt=1%2C5&as_sdtp=
226	http://127.0.0.1:8000/scholar_020.html	22	Determinants of spatial variability of methane emissions from wet grasslands on peat soil	http://link.springer.com/article/10.1023/A:1006009830660	A Van den Pol-van Dasselaar, ML Van Beusichem…	Biogeochemistry	1999	Springer	Black	Abstract Methane (CH4) emissions from soils, representing the consequence of CH4 production, CH4 consumption and CH4 transport, are poorly characterised and show a large spatial variability. This study aimed to assess the determinants of field-scale spatial ...	41			http://scholar.google.co.uk/scholar?hl=en&q=%22Determinants+of+spatial+variability+of+methane+emissions+from+wet+grasslands+on+peat+soil%22&btnG=&as_sdt=1%2C5&as_sdtp=
227	http://127.0.0.1:8000/scholar_020.html	22	Isotope analysis of pyrolysis products from〈 i〉 Sphagnum〈/i〉 peat and dissolved organic matter from bog water	http://www.sciencedirect.com/science/article/pii/S0146638000000413	O Kracht, G Gleixner	Organic geochemistry	2000	Elsevier	Black	... of 13 C depleted carbon, eg respired CO 2 , CO 2 from the oxidation of methane or acetic ... and denitrification processes can account for the total N decrease from peat 10 cm to peat 5 cm. Nitrous oxide (N 2 O), for example, has been found to be mainly produced at the water/air ...	78	http://elmu.umm.ac.id/file.php/1/jurnal/O/Organic%2520Geochemistry/Vol31.Issue7-8.2000/9861.pdf		http://scholar.google.co.uk/scholar?hl=en&q=%22Isotope+analysis+of+pyrolysis+products+from〈+i〉+Sphagnum〈/i〉+peat+and+dissolved+organic+matter+from+bog+water%22&btnG=&as_sdt=1%2C5&as_sdtp=
228	http://127.0.0.1:8000/scholar_020.html	22	Sources and accumulation rates of organic carbon in an equatorial peat bog (Burundi, East Africa) during the Holocene: carbon isotope constraints	http://www.sciencedirect.com/science/article/pii/S0031018298002223	AM Aucour, R Bonnefille, C Hillaire-Marcel	Palaeogeography	1999	Elsevier	Black	The relationship between organic carbon accumulation rates and 13C/12C ratios of total organic carbon (TOC) was investigated in an highland peat bog core (Ru-3) from Equatorial Africa. This core yielded a sequence spanning the last 14 kyr and was analysed with a ...	42			http://scholar.google.co.uk/scholar?hl=en&q=%22Sources+and+accumulation+rates+of+organic+carbon+in+an+equatorial+peat+bog+(Burundi,+East+Africa)+during+the+Holocene:+carbon+isotope+constraints%22&btnG=&as_sdt=1%2C5&as_sdtp=
229	http://127.0.0.1:8000/scholar_020.html	22	Ebullition of methane from peat with falling atmospheric pressure	http://onlinelibrary.wiley.com/doi/10.1029/2005GL022949/full	T Tokida , T Miyazaki…	Geophysical Research …	2005	Wiley Online Library	Black	[2] Because most previous reports on biogeochemical processes of CH4 in peatland have assumed CH4 to be in dissolved state [Clymo and Pearce, 1995], it has been generally believed that diffusion of dissolved CH4 is the main transport mechanism to the ...	41	http://onlinelibrary.wiley.com/doi/10.1029/2005GL022949/full	[HTML]	http://scholar.google.co.uk/scholar?hl=en&q=%22Ebullition+of+methane+from+peat+with+falling+atmospheric+pressure%22&btnG=&as_sdt=1%2C5&as_sdtp=
230	http://127.0.0.1:8000/scholar_020.html	22	Europe's terrestrial biosphere absorbs 7 to 12% of European anthropogenic CO2 emissions	http://www.sciencemag.org/content/300/5625/1538.short	IA Janssens , A Freibauer, P Ciais , P Smith , GJ Nabuurs…	Science	2003	sciencemag.org	Black	... the gap between the small carbon-stock changes and the larger carbon dioxide uptake estimated ... integrated net C uptake by European forests, croplands, grasslands, and peat lands is a ... into the atmosphere in other compounds: carbon monoxide (CO), methane, or nonmethane ...	510	http://web.natur.cuni.cz/fyziol5/kfrserver/global/pdf/2003%20Janssens_euro%20terest%20biosphere.pdf		http://scholar.google.co.uk/scholar?hl=en&q=%22Europe's+terrestrial+biosphere+absorbs+7+to+12%+of+European+anthropogenic+CO2+emissions%22&btnG=&as_sdt=1%2C5&as_sdtp=
231	http://127.0.0.1:8000/scholar_022.html	23	Peatbogs and carbon : a critical synthesis to inform policy development in oceanic peat bog conservation and restoration in the context of climate change	https://194.158.18.86/2012forum/sites/2012forum/files/peatbogs-carbon-critical-synthesis.pdf	R Lindsay, S Campus, W Lane	RSPB Scotland	2010		Grey	Purpose of report 4 not a review but a critical examination of key papers; weaknesses in methodology or interpretation identified; attempt to explain/resolve contradictory evidence; highlighting research needs; confusion over units; inadequate description of habitats ...	27	https://194.158.18.86/2012forum/sites/2012forum/files/peatbogs-carbon-critical-synthesis.pdf	[PDF]	http://scholar.google.co.uk/scholar?hl=en&q=%22Peatbogs+and+carbon+:+a+critical+synthesis+to+inform+policy+development+in+oceanic+peat+bog+conservation+and+restoration+in+the+context+of+climate+change%22&btnG=&as_sdt=1%2C5&as_sdtp=
232	http://127.0.0.1:8000/scholar_022.html	23	Methane concentration and stable isotope distribution as evidence of rhizospheric processes: Comparison of a fen and bog in the Glacial Lake Agassiz Peatland …	http://aob.oxfordjournals.org/content/86/3/655.short	LS Chasar, JP Chanton , PH Glaser, DI Siegel	Annals of Botany	2000	Annals Botany Co	Black	... aC à [(d13CO2 á 103)/(d13CH4 á 103)] and aD à [(dD- H2O á 103)/(dD-CH4 á 103 ... methanogenesis in the shallow fen peat is shifted toward acetate fermentation, while in deep fen peat and for all depths at the bog crest values are more characteristic of CO2 reduction (Fig. ...	87	http://aob.oxfordjournals.org/content/86/3/655.full.pdf		http://scholar.google.co.uk/scholar?hl=en&q=%22Methane+concentration+and+stable+isotope+distribution+as+evidence+of+rhizospheric+processes:+Comparison+of+a+fen+and+bog+in+the+Glacial+Lake+Agassiz+Peatland+…%22&btnG=&as_sdt=1%2C5&as_sdtp=
233	http://127.0.0.1:8000/scholar_022.html	23	Correlation of methane production and functional gene transcriptional activity in a peat soil	http://aem.asm.org/content/75/21/6679.short	TE Freitag, JI Prosser	Applied and environmental microbiology	2009	Am Soc Microbiol	Black	ABSTRACT The transcription dynamics of subunit A of the key gene in methanogenesis (methyl coenzyme M reductase; mcrA) was studied to evaluate the relationship between process rate (methanogenesis) and gene transcription dynamics in a peat soil ecosystem. ...	46	http://aem.asm.org/content/75/21/6679.full		http://scholar.google.co.uk/scholar?hl=en&q=%22Correlation+of+methane+production+and+functional+gene+transcriptional+activity+in+a+peat+soil%22&btnG=&as_sdt=1%2C5&as_sdtp=
234	http://127.0.0.1:8000/scholar_022.html	23	Peat accumulation and the global carbon cycle.	http://www.cabdirect.org/abstracts/19921972710.html	N Malmer, H Boer, E Koster	Greenhouse-impact on cold climate …	1992	cabdirect.org	Book chapter	Abstract A substantial amount of carbon is stored in peat deposits. Most of it has accumulated since the last glaciation. In a virgin peatland the most intense decay of plant litter takes place in the aerobic surface layer and the carbon is released to the atmosphere ...	31			http://scholar.google.co.uk/scholar?hl=en&q=%22Peat+accumulation+and+the+global+carbon+cycle.%22&btnG=&as_sdt=1%2C5&as_sdtp=
235	http://127.0.0.1:8000/scholar_022.html	23	Bioassay for monitoring biochemical methane potential and anaerobic toxicity	http://www.sciencedirect.com/science/article/pii/0043135479900435	WF Owen, DC Stuckey, JB Healy Jr, LY Young…	Water research	1979	Elsevier	Black	... BMP is a measure of substrate biodegradability determined by monitoring cumulative methane production from a sample which is anaerobically incubated in a chemically ... These techniques are demonstrated by an analysis of the BMP and ATA of processed samples of peat. ...	1017			http://scholar.google.co.uk/scholar?hl=en&q=%22Bioassay+for+monitoring+biochemical+methane+potential+and+anaerobic+toxicity%22&btnG=&as_sdt=1%2C5&as_sdtp=
236	http://127.0.0.1:8000/scholar_022.html	23	National inventories of terrestrial carbon sources and sinks: the UK experience	http://link.springer.com/article/10.1023/A:1005425807434	MGR Cannell, R Milne, KJ Hargreaves, TAW Brown…	Climatic Change	1999	Springer	Black	... urbaniza- tion (1.6), drainage of peatlands (0.3) and fenlands (0.5), and peat extraction (0.2). ... quantified, namely, the accumulation of carbon in undrained peatlands (–0.7, ignoring methane emission), sediment ... in coastal marshes (–0.1), the possible UK share of the CO2 and N ...	124			http://scholar.google.co.uk/scholar?hl=en&q=%22National+inventories+of+terrestrial+carbon+sources+and+sinks:+the+UK+experience%22&btnG=&as_sdt=1%2C5&as_sdtp=
237	http://127.0.0.1:8000/scholar_022.html	23	Conversion of peat with carbon monoxide and water	http://www.sciencedirect.com/science/article/pii/0016236177900436	JC Cavalier, E Chornet	Fuel	1977	Elsevier	Black	... JavaScript is disabled on your browser. Please enable JavaScript to use all the features on this page. Fuel. Volume 56, Issue 1, January 1977, Pages 57–64. Cover image Cover image. Conversion of peat with carbon monoxide and water. ...	34			http://scholar.google.co.uk/scholar?hl=en&q=%22Conversion+of+peat+with+carbon+monoxide+and+water%22&btnG=&as_sdt=1%2C5&as_sdtp=
238	http://127.0.0.1:8000/scholar_022.html	23	Peat bog restoration by floating raft formation: the effects of groundwater and peat quality	http://onlinelibrary.wiley.com/doi/10.1046/j.1365-2664.2002.00724.x/full	AJP Smolders , H Tomassen…	Journal of Applied …	2002	Wiley Online Library	Black	... image Figure 7. The effects of incubation pH on the production of methane and carbon dioxide in peat from a cut-over bog remnant (Haaksbergerveen; see Table 2 for characteristics). Different characters in the bars indicate ...	42	http://onlinelibrary.wiley.com/doi/10.1046/j.1365-2664.2002.00724.x/full	[HTML]	http://scholar.google.co.uk/scholar?hl=en&q=%22Peat+bog+restoration+by+floating+raft+formation:+the+effects+of+groundwater+and+peat+quality%22&btnG=&as_sdt=1%2C5&as_sdtp=
239	http://127.0.0.1:8000/scholar_022.html	23	Methane in an acidic bog lake: The influence of peat in the catchment on the biogeochemistry of methane	http://link.springer.com/article/10.1007/s000270300003	P Casper, OC Chan, ALS Furtado, DD Adams	Aquatic sciences	2003	Springer	Black	Abstract. Methanogenesis, an anaerobic microbial process in sediments, was investigated in a naturally acidic bog lake, Grosse Fuchskuhle, in northeastern Germany. The lake was artificially divided into four sub-basins: two western basins receiving humic substances ...	42			http://scholar.google.co.uk/scholar?hl=en&q=%22Methane+in+an+acidic+bog+lake:+The+influence+of+peat+in+the+catchment+on+the+biogeochemistry+of+methane%22&btnG=&as_sdt=1%2C5&as_sdtp=
240	http://127.0.0.1:8000/scholar_022.html	23	Review of peat surface greenhouse gas emissions from oil palm plantations in Southeast Asia	http://sa.indiaenvironmentportal.org.in/files/file/ICCT_Peat-Emissions_Sept2011.pdf	SE Page , R Morrison, C Malins …	International …	2011		Grey	ABSTRACT Palm oil expansion in Southeast Asia is strongly associated with conversion and degradation of peatland. We find that past studies have generally significantly underestimated emissions from palm oil grown on peatland. In particular, this will have ...	28	http://sa.indiaenvironmentportal.org.in/files/file/ICCT_Peat-Emissions_Sept2011.pdf	[PDF]	http://scholar.google.co.uk/scholar?hl=en&q=%22Review+of+peat+surface+greenhouse+gas+emissions+from+oil+palm+plantations+in+Southeast+Asia%22&btnG=&as_sdt=1%2C5&as_sdtp=
241	http://127.0.0.1:8000/scholar_023.html	24	Production vs. solubility in controlling runoff of DOC from peat soils–The use of an event analysis	http://www.sciencedirect.com/science/article/pii/S0022169408002631	F Worrall, HS Gibson, TP Burt	Journal of hydrology	2008	Elsevier	Black	This study considers a detailed record of dissolved organic carbon (DOC) runoff from two small peat-covered catchments in the North of England in order to understand the whether DOC runoff is limited by its solubility or by its production. The study characterises each ...	32			http://scholar.google.co.uk/scholar?hl=en&q=%22Production+vs.+solubility+in+controlling+runoff+of+DOC+from+peat+soils–The+use+of+an+event+analysis%22&btnG=&as_sdt=1%2C5&as_sdtp=
242	http://127.0.0.1:8000/scholar_023.html	24	Characterization of acid‐tolerant H2/ CO2 ‐utilizing methanogenic enrichment cultures from an acidic peat bog in New York State	http://onlinelibrary.wiley.com/doi/10.1111/j.1574-6941.2006.00107.x/full	SL Bräuer , E Yashiro, NG Ueno …	FEMS microbiology …	2006	Wiley Online Library	Black	Abstract Two methanogenic cultures were enriched from acidic peat soil using a growth medium buffered to c. pH 5. One culture, 6A, was obtained from peat after incubation with H 2/CO 2, whereas culture NTA was derived from a 10− 4 dilution of untreated peat into a ...	42	http://onlinelibrary.wiley.com/doi/10.1111/j.1574-6941.2006.00107.x/full	[HTML]	http://scholar.google.co.uk/scholar?hl=en&q=%22Characterization+of+acid‐tolerant+H2/+CO2+‐utilizing+methanogenic+enrichment+cultures+from+an+acidic+peat+bog+in+New+York+State%22&btnG=&as_sdt=1%2C5&as_sdtp=
243	http://127.0.0.1:8000/scholar_023.html	24	〈 sup〉 13〈/sup〉 C/Palynological evidence of differential residence times of organic carbon prior to its sedimentation in East African Rift Lakes and peat bogs	http://www.sciencedirect.com/science/article/pii/0277379189900371	C Hillaire-Marcel, AM Aucour, R Bonnefille…	Quaternary Science …	1989	Elsevier	Black	Abstract Most terrestrial plants producing large amounts of organic matter in the East African Rift follow the Calvin (C3) photosynthetic pathway. Their end products have δ 13 C values of ca.− 27±2‰(vs. PDB). On the contrary, most Cyperaceae (notably Cyperus papyrus and C ...	41			http://scholar.google.co.uk/scholar?hl=en&q=%22〈+sup〉+13〈/sup〉+C/Palynological+evidence+of+differential+residence+times+of+organic+carbon+prior+to+its+sedimentation+in+East+African+Rift+Lakes+and+peat+bogs%22&btnG=&as_sdt=1%2C5&as_sdtp=
244	http://127.0.0.1:8000/scholar_023.html	24	Increases in humic dissolved organic carbon export from upland peat catchments: the role of temperature, declining sulphur deposition and changes in land …	http://www.int-res.com/abstracts/cr/v45/p43-56/	AR Yallop, B Clutterbuck, J Thacker	Climate Research	2010		Black	ABSTRACT: Peat soils represent a highly significant carbon store and are usually assumed to serve as net sinks within carbon budgets for climate modelling. However, marked increases in dissolved organic carbon (DOC) concentrations in upland peat drainage ...	27			http://scholar.google.co.uk/scholar?hl=en&q=%22Increases+in+humic+dissolved+organic+carbon+export+from+upland+peat+catchments:+the+role+of+temperature,+declining+sulphur+deposition+and+changes+in+land+…%22&btnG=&as_sdt=1%2C5&as_sdtp=
245	http://127.0.0.1:8000/scholar_023.html	24	Fluxes of CO2 , CH4 and N2O from a Welsh peatland following simulation of water table draw-down: potential feedback to climatic change	http://link.springer.com/article/10.1007/BF00000574	C Freeman , MA Lock, B Reynolds	Biogeochemistry	1992	Springer	Black	... few investigations of the potential effects of global warming on wetland greenhouse gas production to ... 1) was based around a central chamber containing a monolith of peat and consisted ... Fluxes of carbon dioxide, methane and nitrous oxide were monitored every 2 weeks of the ...	187			http://scholar.google.co.uk/scholar?hl=en&q=%22Fluxes+of+CO2+,+CH4+and+N2O+from+a+Welsh+peatland+following+simulation+of+water+table+draw-down:+potential+feedback+to+climatic+change%22&btnG=&as_sdt=1%2C5&as_sdtp=
246	http://127.0.0.1:8000/scholar_023.html	24	Increases in fluxes of greenhouse gases and methyl mercury following flooding of an experimental reservoir	http://pubs.acs.org/doi/abs/10.1021/es9604931	CA Kelly, JWM Rudd, RA Bodaly…	Environmental …	1997	ACS Publications	Black	... 4). Another emerging concern is the loss from reservoirs to the atmosphere of carbon dioxide (CO 2 ... of MeHg; and (3) there is a large store of organic carbon in peat deposits, and ... ELARP) was undertaken with two objectives: (1) to quantify the change in greenhouse gas fluxes to ...	297	http://ecologia.icb.ufmg.br/~rpcoelho/Congressos/DGL2008/Reservoirs%20GHG%20emiissions/Environm%20Sci%20Technol_1997.pdf		http://scholar.google.co.uk/scholar?hl=en&q=%22Increases+in+fluxes+of+greenhouse+gases+and+methyl+mercury+following+flooding+of+an+experimental+reservoir%22&btnG=&as_sdt=1%2C5&as_sdtp=
247	http://127.0.0.1:8000/scholar_023.html	24	Effects of experimental water table and temperature manipulations on ecosystem CO2 fluxes in an Alaskan rich fen	http://link.springer.com/article/10.1007/s10021-009-9292-y	MR Chivers, MR Turetsky, JM Waddington , JW Harden…	Ecosystems	2009	Springer	Black	... 2007. Response of peatland carbon dioxide and methane fluxes to a water table drawdown experiment ... Peat CO 2 production in a natural and cutover peatland: implications for restoration ... Effects of permafrost melting on CO 2 and CH4 exchange of a poorly drained black spruce ...	58	http://www.sel.uaf.edu/manuscripts/112_chivers_et_al_reprint-ecosystems-2009.pdf		http://scholar.google.co.uk/scholar?hl=en&q=%22Effects+of+experimental+water+table+and+temperature+manipulations+on+ecosystem+CO2+fluxes+in+an+Alaskan+rich+fen%22&btnG=&as_sdt=1%2C5&as_sdtp=
248	http://127.0.0.1:8000/scholar_023.html	24	Holocene monsoon climate documented by oxygen and carbon isotopes from lake sediments and peat bogs in China: a review and synthesis	http://www.sciencedirect.com/science/article/pii/S0277379111001259	J Zhang, F Chen, JA Holmes, H Li, X Guo…	Quaternary Science …	2011	Elsevier	Black	Abstract There has been much recent debate about Holocene climate variation in the monsoon region of China, especially the temporal pattern of variations in precipitation, the time-transgressive nature of the Holocene precipitation maximum, and the extent to which ...	51	http://www.researchgate.net/publication/241087867_Holocene_monsoon_climate_documented_by_oxygen_and_carbon_isotopes_from_lake_sediments_and_peat_bogs_in_China_a_review_and_synthesis/file/72e7e521d69f908362.pdf		http://scholar.google.co.uk/scholar?hl=en&q=%22Holocene+monsoon+climate+documented+by+oxygen+and+carbon+isotopes+from+lake+sediments+and+peat+bogs+in+China:+a+review+and+synthesis%22&btnG=&as_sdt=1%2C5&as_sdtp=
249	http://127.0.0.1:8000/scholar_023.html	24	Multi-technique assessment of spatial and temporal variability of methane fluxes in a peat meadow	http://www.sciencedirect.com/science/article/pii/S0168192309001622	DMD Hendriks, J Van Huissteden…	Agricultural and Forest …	2010	Elsevier	Black	Methane fluxes measured in a eutrophic peat meadow in The Netherlands dominated by vascular plants showed high spatial and temporal variability. To elucidate this variability as well as the underlying processes, various measurement techniques were used: soil ...	45			http://scholar.google.co.uk/scholar?hl=en&q=%22Multi-technique+assessment+of+spatial+and+temporal+variability+of+methane+fluxes+in+a+peat+meadow%22&btnG=&as_sdt=1%2C5&as_sdtp=
250	http://127.0.0.1:8000/scholar_023.html	24	An ombrotrophic bog as a methane reservoir	http://onlinelibrary.wiley.com/doi/10.1029/GB003i003p00205/full	A Brown, SP Mathur, DJ Kushner	Global Biogeochemical …	1989	Wiley Online Library	Black	... sample collection in 160 mL anaerobic vials, using 10 g of wet peat (approximately equivalent ... vials were mixed by vortexing, flushed with a 20:80 mixture of carbon dioxide and hydrogen ... were incubated for one week at 25øC before measuring the amount of methane produced. ...	57			http://scholar.google.co.uk/scholar?hl=en&q=%22An+ombrotrophic+bog+as+a+methane+reservoir%22&btnG=&as_sdt=1%2C5&as_sdtp=
251	http://127.0.0.1:8000/scholar_024.html	25	Isolation and identification of methanogen-specific DNA from blanket bog peat by PCR amplification and sequence analysis.	http://aem.asm.org/content/62/2/668.short	BA Hales, C Edwards, DA Ritchie, G Hall…	Applied and …	1996	Am Soc Microbiol	Black	... The sequences recovered from the peat formed two clusters on the end of long branches within the methanogen radiation that are distinct ... Methane, despite its lower con- centration, is estimated to be 25 to 30 times more effective as a greenhouse gas than carbon dioxide. ...	384	http://aem.asm.org/content/62/2/668.full.pdf		http://scholar.google.co.uk/scholar?hl=en&q=%22Isolation+and+identification+of+methanogen-specific+DNA+from+blanket+bog+peat+by+PCR+amplification+and+sequence+analysis.%22&btnG=&as_sdt=1%2C5&as_sdtp=
252	http://127.0.0.1:8000/scholar_024.html	25	Hysteresis in the temperature response of carbon dioxide and methane production in peat soils	http://link.springer.com/article/10.1023/A:1006097808262	K Updegraff, SD Bridgham, J Pastor , P Weishampel	Biogeochemistry	1998	Springer	Black	Abstract The ability to predict the effects of climate change on trace gas fluxes requires a knowledge of microbial temperature responses. However, the response of a microbial community to temperature in a given substrate may be complicated by its thermal history. ...	36	http://www.researchgate.net/publication/226990974_Hysteresis_in_the_temperature_response_of_carbon_dioxide_and_methane_production_in_peat_soils/file/9fcfd50b943b45037e.pdf		http://scholar.google.co.uk/scholar?hl=en&q=%22Hysteresis+in+the+temperature+response+of+carbon+dioxide+and+methane+production+in+peat+soils%22&btnG=&as_sdt=1%2C5&as_sdtp=
253	http://127.0.0.1:8000/scholar_024.html	25	Methane production in Mississippi River deltaic plain peat	http://www.sciencedirect.com/science/article/pii/0146638086900690	RD DeLaune, CJ Smith , WH Patrick Jr	Organic geochemistry	1986	Elsevier	Black	Abstract Seasonal methane production in a coastal peat deposit was studied. Dissolved methane content in interstitial water increased with increasing depth. Methane production rate was related to temperature in the 0–40 cm depth, but was relatively constant at depths ...	18			http://scholar.google.co.uk/scholar?hl=en&q=%22Methane+production+in+Mississippi+River+deltaic+plain+peat%22&btnG=&as_sdt=1%2C5&as_sdtp=
254	http://127.0.0.1:8000/scholar_024.html	25	Post-drainage changes in vegetation composition and carbon balance in Lakkasuo mire, Central Finland	http://link.springer.com/article/10.1023/A:1004466330076	K Minkkinen, H Vasander, S Jauhiainen, M Karsisto…	Plant and Soil	1999	Springer	Black	... The CO2 emissions usually increase (Moore and Dalva, 1993; Silvola et al., 1996), while the emissions of CH4 decrease (Martikainen et al., 1995; Nykänen et al., 1998). ... Peat C stores have been found to decrease Page 2. 108 ...	94			http://scholar.google.co.uk/scholar?hl=en&q=%22Post-drainage+changes+in+vegetation+composition+and+carbon+balance+in+Lakkasuo+mire,+Central+Finland%22&btnG=&as_sdt=1%2C5&as_sdtp=
255	http://127.0.0.1:8000/scholar_024.html	25	A new estimate of changing carbon storage on land since the last glacial maximum, based on global land ecosystem reconstruction	http://www.sciencedirect.com/science/article/pii/S0921818198000034	JM Adams, H Faure	Global and Planetary Change	1998	Elsevier	Black	... A considerable amount of discussion and speculation has focussed on models of past ecosystem responses to lower carbon dioxide levels (eg, Robinson, 1994). ... MdtnScrub, 40, 60, 5, 105. Per-unit-area suggested carbon storage (tC/ha). 14. ... 27. Bog/Swamp, 20, NA, 0, 20 (+peat) ...	104	http://www.esd.ornl.gov/projects/qen/GPC.html		http://scholar.google.co.uk/scholar?hl=en&q=%22A+new+estimate+of+changing+carbon+storage+on+land+since+the+last+glacial+maximum,+based+on+global+land+ecosystem+reconstruction%22&btnG=&as_sdt=1%2C5&as_sdtp=
256	http://127.0.0.1:8000/scholar_024.html	25	Relevance of peat draining rivers in central Sumatra for the riverine input of dissolved organic carbon into the ocean	http://www.sciencedirect.com/science/article/pii/S0272771407000637	A Baum, T Rixen, J Samiaji	Estuarine	2007	Elsevier	Black	Sources and discharges of dissolved organic carbon (DOC) from the central Sumatran river Siak were studied. DOC concentrations in the Siak ranged between 560 and 2594μmoll− 1 and peak out after its confluence with the river Mandau. The Mandau drains part of the ...	37	http://www.aseanbiodiversity.info/Abstract/53005928.pdf		http://scholar.google.co.uk/scholar?hl=en&q=%22Relevance+of+peat+draining+rivers+in+central+Sumatra+for+the+riverine+input+of+dissolved+organic+carbon+into+the+ocean%22&btnG=&as_sdt=1%2C5&as_sdtp=
257	http://127.0.0.1:8000/scholar_024.html	25	Carbon loss estimates from cultivated peat soils in Norway: a comparison of three methods	http://link.springer.com/article/10.1007/s10705-008-9171-5	A Grønlund, A Hauge, A Hovde, DP Rasse	Nutrient Cycling in …	2008	Springer	Black	Abstract Drainage and cultivation of peat soils stimulates soil organic matter (SOM) mineralization, which substantially increases CO 2 emissions from soils. Large uncertainties are associated with this CO 2 flux, and little data are available, especially in Norway. The ...	28	http://www.researchgate.net/publication/226173026_Carbon_loss_estimates_from_cultivated_peat_soils_in_Norway_a_comparison_of_three_methods/file/e0b49527e4b5fd2f23.pdf		http://scholar.google.co.uk/scholar?hl=en&q=%22Carbon+loss+estimates+from+cultivated+peat+soils+in+Norway:+a+comparison+of+three+methods%22&btnG=&as_sdt=1%2C5&as_sdtp=
258	http://127.0.0.1:8000/scholar_024.html	25	The influence of water table levels on methane and carbon dioxide emissions from peatland soils	http://pubs.aic.ca/doi/abs/10.4141/cjss89-004	TR Moore, R Knowles	Canadian Journal of Soil Science	1989		Black	... 6 co2 FLUX (g mt 6-t1 cH4 FLUX (mg mr d{l POSITION OF WATER TABLE ICMI Fig. 1. The flux of carbon dioxide and methane from the peat columns, in relation to water table posi- tion, from inundation (10 cm above the peat surface) to 70 cm below the peat surface. ...	334			http://scholar.google.co.uk/scholar?hl=en&q=%22The+influence+of+water+table+levels+on+methane+and+carbon+dioxide+emissions+from+peatland+soils%22&btnG=&as_sdt=1%2C5&as_sdtp=
259	http://127.0.0.1:8000/scholar_024.html	25	Mobilization pathways of organic carbon from permafrost to arctic rivers in a changing climate	http://onlinelibrary.wiley.com/doi/10.1029/2007GL030689/full	L Guo , CL Ping, RW Macdonald	Geophysical Research …	2007	Wiley Online Library	Black	... latitude watersheds: Implications for characterization and flux of river DOC, Geophys. Res. Lett., 33, L10401, doi:10.1029/2006GL025754. ... Freeman, C., CD Evans, DT Monteith, B. Reynolds, and N. Fenner (2001), Export of organic carbon from peat soils, Nature, 412, 785–788. ...	98	http://onlinelibrary.wiley.com/doi/10.1029/2007GL030689/full	[HTML]	http://scholar.google.co.uk/scholar?hl=en&q=%22Mobilization+pathways+of+organic+carbon+from+permafrost+to+arctic+rivers+in+a+changing+climate%22&btnG=&as_sdt=1%2C5&as_sdtp=
260	http://127.0.0.1:8000/scholar_024.html	25	Methane flux from boreal peatlands	http://inis.iaea.org/search/search.aspx?orig_q=RN:25009566	P Crill, K Bartlett, N Roulet				Black	... The anaerobic conditions that cause these soils to accumulate carbon also makes wet, boreal ... review of the flux measured (with range roughly 1 - 2000 mg methane/m2d), considers ... climate change might affect future fluxes SubjectCOAL, LIGNITE, AND PEAT (C5611) Source ...	77			http://scholar.google.co.uk/scholar?hl=en&q=%22Methane+flux+from+boreal+peatlands%22&btnG=&as_sdt=1%2C5&as_sdtp=
261	http://127.0.0.1:8000/scholar_021.html	26	How northern peatlands influence the Earth's radiative budget: Sustained methane emission versus sustained carbon sequestration	http://onlinelibrary.wiley.com/doi/10.1029/2005JG000091/full	S Frolking, N Roulet …	Journal of Geophysical …	2006	Wiley Online Library	Black	... efficiency of greenhouse gas i (A CH4 = 1.30 × 10 −13 W m −2 kg −1 CH 4 ; A CO2 = 0.0198 × 10 ... Note that CO 2 is the greenhouse gas for i = 0−4, and CH 4 is i = 5. ... Most carbon emitted from the peat as CH 4 eventually returns to the atmospheric CO 2 pool via oxidation in the ...	106	http://onlinelibrary.wiley.com/doi/10.1029/2005JG000091/full	[HTML]	http://scholar.google.co.uk/scholar?hl=en&q=%22How+northern+peatlands+influence+the+Earth's+radiative+budget:+Sustained+methane+emission+versus+sustained+carbon+sequestration%22&btnG=&as_sdt=1%2C5&as_sdtp=
262	http://127.0.0.1:8000/scholar_021.html	26	Controls on methane production in a tidal freshwater estuary and a peatland: methane production via acetate fermentation and CO2 reduction	http://link.springer.com/article/10.1023/A:1021128400602	GB Avery, RD Shannon, JR White, CS Martens…	Biogeochemistry	2003	Springer	Black	... conducted at both sites at various temperatures showed that Buck Hollow peat methane production was ... of methane, and its potential for global warming as a greenhouse gas, have generated ... the overall effects of temperature regime, the specific responses of CO2 reducing and ...	69	http://127.0.0.1:8000/scholar?q=info:qrmnCcOCPrAJ:scholar.google.com/&output=instlink&hl=en&as_sdt=0,5&scillfp=5486468219695204738&oi=lle		http://scholar.google.co.uk/scholar?hl=en&q=%22Controls+on+methane+production+in+a+tidal+freshwater+estuary+and+a+peatland:+methane+production+via+acetate+fermentation+and+CO2+reduction%22&btnG=&as_sdt=1%2C5&as_sdtp=
263	http://127.0.0.1:8000/scholar_021.html	26	Global peatland dynamics since the Last Glacial Maximum	http://onlinelibrary.wiley.com/doi/10.1029/2010GL043584/full	Z Yu, J Loisel, DP Brosseau…	Geophysical …	2010	Wiley Online Library	Black	... carbon dioxide and terrestrial carbon since the Last Glacial Maximum, Global Biogeochem. ... a peat bog in Patagonia, Quat. ... (2004), Siberian peatlands a net carbon sink and global methane source since the early Holocene, Science, 303, 353–356, doi:10.1126/science.1090553. ...	143	http://onlinelibrary.wiley.com/doi/10.1029/2010GL043584/full	[HTML]	http://scholar.google.co.uk/scholar?hl=en&q=%22Global+peatland+dynamics+since+the+Last+Glacial+Maximum%22&btnG=&as_sdt=1%2C5&as_sdtp=
264	http://127.0.0.1:8000/scholar_021.html	26	Principles for a climate regulation mechanism during the late Phanerozoic era, based on carbon fixation in peat -forming wetlands	http://inis.iaea.org/search/search.aspx?orig_q=RN:28025142	LG Franzen, D Chen , LF Klinger				Black	Peat growth in temperate peat-forming wetlands is believed to have been one of the major climate regulation mechanisms throughout the late Phanerozoic era. Since plant life first evolved on land, peat-forming wetland have been significant terrestrial carbon sinks, ...	25			http://scholar.google.co.uk/scholar?hl=en&q=%22Principles+for+a+climate+regulation+mechanism+during+the+late+Phanerozoic+era,+based+on+carbon+fixation+in+peat+-forming+wetlands%22&btnG=&as_sdt=1%2C5&as_sdtp=
265	http://127.0.0.1:8000/scholar_021.html	26	Methane production in Minnesota peatlands	http://aem.asm.org/content/47/6/1266.short	RT Williams, RL Crawford	Applied and Environmental …	1984	Am Soc Microbiol	Black	... 2 m by 6.4 mm; stainless steel; 130, 70, and 130°C) and carbon dioxide (Chromasorb 106 ... However, under similar circum- stances the yeast extract-vitamin mixture and H2-CO2 addi- tion did ... TABLE 3. Effect of pH on methane production from Cedar Creek peat samples Rate of ...	230	http://aem.asm.org/content/47/6/1266.full.pdf		http://scholar.google.co.uk/scholar?hl=en&q=%22Methane+production+in+Minnesota+peatlands%22&btnG=&as_sdt=1%2C5&as_sdtp=
266	http://127.0.0.1:8000/scholar_021.html	26	… for determining peat humification and for quantifying peat bulk density, organic matter and carbon content for palaeostudies of climate and peatland carbon …	http://pixelrauschen.de/wbmp/media/map07/map_07_07.pdf	FM Chambers , DW Beilman, Z Yu	Mires and Peat	2011	pixelrauschen.de	Black	SUMMARY Quantitative palaeostudies of climate change and carbon dynamics are reliant on precise and accurate laboratory measurements. Here we present laboratory protocols for the colorimetric determination of peat humification and for bulk density and organic matter ...	42	http://pixelrauschen.de/wbmp/media/map07/map_07_07.pdf	[PDF]	http://scholar.google.co.uk/scholar?hl=en&q=%22…+for+determining+peat+humification+and+for+quantifying+peat+bulk+density,+organic+matter+and+carbon+content+for+palaeostudies+of+climate+and+peatland+carbon+…%22&btnG=&as_sdt=1%2C5&as_sdtp=
267	http://127.0.0.1:8000/scholar_021.html	26	Effect of converting wetland forest to sago palm plantations on methane gas flux and organic carbon dynamics in tropical peat soil	http://onlinelibrary.wiley.com/doi/10.1002/(SICI)1099-1085(19981030)12:13/14%3C2073::AID-HYP720%3E3.0.CO;2-K/abstract	K Inubushi, A Hadi, M Okazaki…	Hydrological …	1998	Wiley Online Library	Black	Abstract The effect of changing wetland forest to sago palm plantations on methane gas flux and organic carbon dynamics in tropical peat soil was studied in the field and the laboratory using soil samples from the Peat Research Station, Sarawak, Malaysia. A small amount of ...	24			http://scholar.google.co.uk/scholar?hl=en&q=%22Effect+of+converting+wetland+forest+to+sago+palm+plantations+on+methane+gas+flux+and+organic+carbon+dynamics+in+tropical+peat+soil%22&btnG=&as_sdt=1%2C5&as_sdtp=
268	http://127.0.0.1:8000/scholar_021.html	26	Restoration of drained peatlands in southern Finland: initial effects on vegetation change and CO2 balance	http://onlinelibrary.wiley.com/doi/10.1046/j.1365-2664.1999.00430.x/full	VM Komulainen, ES Tuittila …	Journal of applied …	1999	Wiley Online Library	Black	... was removed from these plots and the peat surface was kept bare throughout the growing season. In May 1996, all the vascular plants were removed from plots FR1 and FR6 on the fen site and kept from regrowing by regular cuttings. Carbon dioxide flux measurements. ...	102	http://onlinelibrary.wiley.com/doi/10.1046/j.1365-2664.1999.00430.x/full	[HTML]	http://scholar.google.co.uk/scholar?hl=en&q=%22Restoration+of+drained+peatlands+in+southern+Finland:+initial+effects+on+vegetation+change+and+CO2+balance%22&btnG=&as_sdt=1%2C5&as_sdtp=
269	http://127.0.0.1:8000/scholar_021.html	26	Equilibrium analysis of carbon pools and fluxes of forest biomes in the former Soviet Union	http://www.nrcresearchpress.com/doi/pdf/10.1139/x93-013	TP Kolchugina, TS Vinson	Canadian Journal of Forest …	1993	NRC Research Press	Black	... Data on carbon content in peat soils were integrated with hectare data on the ... amount returned to the atmosphere through heterotrophic res- piration, and exceeded CO2 industrial emissions in the former Soviet Union, estimated at approximately 1020 Mt of carbon (Makarov and ...	74			http://scholar.google.co.uk/scholar?hl=en&q=%22Equilibrium+analysis+of+carbon+pools+and+fluxes+of+forest+biomes+in+the+former+Soviet+Union%22&btnG=&as_sdt=1%2C5&as_sdtp=
270	http://127.0.0.1:8000/scholar_021.html	26	Beyond “the limits to peat bog growth”: cross-scale feedback in peatland development	http://www.esajournals.org/doi/abs/10.1890/0012-9615(2006)076%5B0299:BTLTPB%5D2.0.CO%3B2	LR Belyea , AJ Baird	Ecological Monographs	2006	Eco Soc America	Black	... 2003). Carbon isotopic evidence suggests that a proportion of deep-peat methane is derived from recently fixed organic matter, possibly transported down-profile as dissolved organic carbon, but that old peat is also utilized (Aravena et al. 1993, Chanton et al. ...	157	https://qmro.qmul.ac.uk/jspui/bitstream/123456789/4239/2/BELYEABeyondTheLimits2006PUB.pdf		http://scholar.google.co.uk/scholar?hl=en&q=%22Beyond+“the+limits+to+peat+bog+growth”:+cross-scale+feedback+in+peatland+development%22&btnG=&as_sdt=1%2C5&as_sdtp=
271	http://127.0.0.1:8000/scholar_027.html	27	Vascular plant controls on methane emissions from northern peatforming wetlands	http://www.sciencedirect.com/science/article/pii/S0169534799016493	A Joabsson, TR Christensen , B Wallén	Trends in Ecology & Evolution	1999	Elsevier	Black	... 1. The coupling between carbon dioxide (CO 2 ) and methane (CH 4 ) cycling in peatlands is tightly ... 200 Gt) of the total world pool of soil carbon is stored as peat in these ... 5 . The prevalence of waterlogged, anoxic conditions favours production of CH 4 , a greenhouse gas with a ...	215			http://scholar.google.co.uk/scholar?hl=en&q=%22Vascular+plant+controls+on+methane+emissions+from+northern+peatforming+wetlands%22&btnG=&as_sdt=1%2C5&as_sdtp=
272	http://127.0.0.1:8000/scholar_027.html	27	Land clearing and the biofuel carbon debt	http://www.sciencemag.org/content/319/5867/1235.short	J Fargione , J Hill , D Tilman , S Polasky , P Hawthorne	Science	2008	sciencemag.org	Black	... debt” by releasing 17 to 420 times more CO 2 than the annual greenhouse gas (GHG) reductions that ... 1D). Until then, producing and using palm biodiesel from this land would cause greater GHG release than ... of ∼55 Mg of CO 2 ha –1 yr –1 from oxidative peat decomposition (5 ...	2449	http://www3.calepa.ca.gov/CEPC/2013/Feb28/Comments/AppA_Ex6.pdf		http://scholar.google.co.uk/scholar?hl=en&q=%22Land+clearing+and+the+biofuel+carbon+debt%22&btnG=&as_sdt=1%2C5&as_sdtp=
273	http://127.0.0.1:8000/scholar_027.html	27	Carbon emissions from a temperate peat fire and its relevance to interannual variability of trace atmospheric greenhouse gases	http://onlinelibrary.wiley.com/doi/10.1029/2005JD006455/full	B Poulter , NL Christensen…	Journal of Geophysical …	2006	Wiley Online Library	Black	[1] The contribution of wildfire in peatlands outside of boreal and tropical regions to interannual variability of global carbon emissions has been relatively little studied. There are 0.19 to 0.88 million km 2 of localized peat deposits in the temperate zone (30–50° latitude) where ...	24	http://onlinelibrary.wiley.com/doi/10.1029/2005JD006455/full	[HTML]	http://scholar.google.co.uk/scholar?hl=en&q=%22Carbon+emissions+from+a+temperate+peat+fire+and+its+relevance+to+interannual+variability+of+trace+atmospheric+greenhouse+gases%22&btnG=&as_sdt=1%2C5&as_sdtp=
274	http://127.0.0.1:8000/scholar_027.html	27	Carbon ‐14 wiggle‐match dating of peat deposits: advantages and limitations	http://onlinelibrary.wiley.com/doi/10.1002/jqs.810/full	M Blaauw , B Van Geel , D Mauquoy…	Journal of …	2004	Wiley Online Library	Black	Abstract Carbon-14 wiggle-match dating (WMD) of peat deposits uses the non-linear relationship between 14 C age and calendar age to match the shape of a series of closely spaced peat 14 C dates with the 14 C calibration curve. The method of WMD is discussed, ...	39	http://www.researchgate.net/publication/30494920_Carbon-14_wiggle-match_dating_of_peat_deposits_advantages_and_limitations/file/9fcfd5098a00561960.pdf		http://scholar.google.co.uk/scholar?hl=en&q=%22Carbon+‐14+wiggle‐match+dating+of+peat+deposits:+advantages+and+limitations%22&btnG=&as_sdt=1%2C5&as_sdtp=
275	http://127.0.0.1:8000/scholar_027.html	27	Fate of [15N] glycine in peat as determined by carbon -13 and nitrogen-15 CP-MAS NMR spectroscopy	http://pubs.acs.org/doi/abs/10.1021/jf00068a004	LM Benzing-Purdie, MV Cheshire…	Journal of Agricultural …	1986	ACS Publications	Black	Peat samples, nonsterile, sterilized by y irradiation or autoclaving, were incubated with [15N] glycine for a period of 6 months. The 13C NMR data showed the established trend of increased humification with decreasing particle size and that autoclaving had significantly ...	38			http://scholar.google.co.uk/scholar?hl=en&q=%22Fate+of+[15N]+glycine+in+peat+as+determined+by+carbon+-13+and+nitrogen-15+CP-MAS+NMR+spectroscopy%22&btnG=&as_sdt=1%2C5&as_sdtp=
276	http://127.0.0.1:8000/scholar_027.html	27	Organic carbon transformations in high-Arctic peat soils: key functions and microorganisms	http://www.nature.com/ismej/journal/v7/n2/abs/ismej201299a.html	A Tveit, R Schwacke, MM Svenning, T Urich	The ISME journal	2012	nature.com	Black	Abstract A substantial part of the Earths' soil organic carbon (SOC) is stored in Arctic permafrost peatlands, which represent large potential sources for increased emissions of the greenhouse gases CH 4 and CO 2 in a warming climate. The microbial communities and ...	31	http://www.nature.com/ismej/journal/v7/n2/full/ismej201299a.html		http://scholar.google.co.uk/scholar?hl=en&q=%22Organic+carbon+transformations+in+high-Arctic+peat+soils:+key+functions+and+microorganisms%22&btnG=&as_sdt=1%2C5&as_sdtp=
277	http://127.0.0.1:8000/scholar_027.html	27	Increased CO2 and nutrient status changes affect phytomass and the production of plant defensive secondary chemicals in Salix myrsinifolia (Salisb.)	http://link.springer.com/article/10.1007/BF00317433	R Julkunen-Tiitto, J Tahvanainen, J Silvola	Oecologia	1993	Springer	Black	... Carbon dioxide increased the total shoot phytomass of peat seedlings ... slightly enhanced but 1050 ppm COz gave growth figures similar to those at the control CO2 level ... Leaf nitrogen content and total soluble sugar contents were significantly higher in peat seedlings than in sand ...	83			http://scholar.google.co.uk/scholar?hl=en&q=%22Increased+CO2+and+nutrient+status+changes+affect+phytomass+and+the+production+of+plant+defensive+secondary+chemicals+in+Salix+myrsinifolia+(Salisb.)%22&btnG=&as_sdt=1%2C5&as_sdtp=
278	http://127.0.0.1:8000/scholar_027.html	27	Export of dissolved organic carbon from an upland peatland during storm events: implications for flux estimates	http://www.sciencedirect.com/science/article/pii/S002216940700532X	JM Clark , SN Lane , PJ Chapman, JK Adamson	Journal of Hydrology	2007	Elsevier	Black	... Dissolved organic carbon (DOC) fluxes in freshwaters increase during storm events (Hope et al., 1994 ... al., 1994), which is perhaps one of the most consistent observations about DOC dynamics (Billett ... with organo-mineral soils or a combination of soil types (eg peat/wetland and ...	74			http://scholar.google.co.uk/scholar?hl=en&q=%22Export+of+dissolved+organic+carbon+from+an+upland+peatland+during+storm+events:+implications+for+flux+estimates%22&btnG=&as_sdt=1%2C5&as_sdtp=
279	http://127.0.0.1:8000/scholar_027.html	27	Distribution of assimilated carbon in the system Phragmites australis-waterlogged peat soil after carbon -14 pulse labelling	http://link.springer.com/article/10.1007/s003740000204	M Richert, S Saarnio, S Juutinen, J Silvola…	Biology and fertility of …	2000	Springer	Black	Abstract Short-term (3–6 days) and long-term (27 days) laboratory experiments were carried out to determine the distribution of assimilated C in the system Phragmites australis (common reed)-waterlogged fen soil after 14 C pulse labelling. The investigated system of ...	35			http://scholar.google.co.uk/scholar?hl=en&q=%22Distribution+of+assimilated+carbon+in+the+system+Phragmites+australis-waterlogged+peat+soil+after+carbon+-14+pulse+labelling%22&btnG=&as_sdt=1%2C5&as_sdtp=
280	http://127.0.0.1:8000/scholar_027.html	27	Hydrogen, carbon and sulphur isotope ratios in peat : the role of diagenessis and water regimes in reconstruction of past climates	http://link.springer.com/article/10.1007/s10311-004-0093-4	MO Jędrysek, G Skrzypek	Environmental Chemistry Letters	2005	Springer	Black	Abstract We demonstrate that carbon, hydrogen and sulphur isotope ratios both, in the total peat (δ 13 C tp=− 25.52 to− 28.27‰, δD tp=− 78.67 and− 109.24‰, δ 34 S= 4.35 to 19.87‰), and in cellulose from the peat (δ 13 C nc=− 25.06 to− 27.33‰ and δD nc=− ...	31			http://scholar.google.co.uk/scholar?hl=en&q=%22Hydrogen,+carbon+and+sulphur+isotope+ratios+in+peat+:+the+role+of+diagenessis+and+water+regimes+in+reconstruction+of+past+climates%22&btnG=&as_sdt=1%2C5&as_sdtp=
281	http://127.0.0.1:8000/scholar_029.html	28	Effects of physical, chemical and botanical characteristics of peat on carbon gas fluxes	http://journals.lww.com/soilsci/Abstract/1994/11000/Effects_of_Physical,_Chemical_and_Botanical.8.aspx	A Buttler , H Dinel, PEM Lévesque	Soil Science	1994		Black	Abstract Peatland ecosystems may contribute about 65% of all natural methane emission to the atmosphere. During May-June 1988, CH4 and CO2 fluxes were measured with the static chamber method at the surface of a basin swamp and at three depths. The daily average ...	23			http://scholar.google.co.uk/scholar?hl=en&q=%22Effects+of+physical,+chemical+and+botanical+characteristics+of+peat+on+carbon+gas+fluxes%22&btnG=&as_sdt=1%2C5&as_sdtp=
282	http://127.0.0.1:8000/scholar_029.html	28	Carbon cycling in peatlands A review of processes and controls	http://www.nrcresearchpress.com/doi/abs/10.1139/a02-004	C Blodau	Environmental Reviews	2002	NRC Research Press	Black	... Carbon mineralization rates Carbon dioxide production is the result of the mineralization of soil organic C and ... Moreover, the buildup of dissolved CH4 in the peat might require relatively long time ... Methanotrophic bacteria in aerobic soil reoxidize methane to CO2 (Edwards et al. ...	153	http://www.uni-muenster.de/imperia/md/content/landschaftsoekologie/hydrologiebodenkunde/profblodauliteratur/_6__blodau_2002.pdf		http://scholar.google.co.uk/scholar?hl=en&q=%22Carbon+cycling+in+peatlands+A+review+of+processes+and+controls%22&btnG=&as_sdt=1%2C5&as_sdtp=
283	http://127.0.0.1:8000/scholar_029.html	28	The influence of temperature and water table position on carbon dioxide and methane emissions from laboratory columns of peatland soils	http://onlinelibrary.wiley.com/doi/10.1111/j.1365-2389.1993.tb02330.x/full	TR Moore, M Dalva	Journal of Soil Science	1993	Wiley Online Library	Black	... Table 3. Significant results in the analysis of variance of the emissions of carbon dioxide and methane from the three peat-type columns at differing temperatures (10 and 22.6"C, Temp.) and water table position (0 and 40cm, w) and including the duration of the experiment (Day) ...	354			http://scholar.google.co.uk/scholar?hl=en&q=%22The+influence+of+temperature+and+water+table+position+on+carbon+dioxide+and+methane+emissions+from+laboratory+columns+of+peatland+soils%22&btnG=&as_sdt=1%2C5&as_sdtp=
284	http://127.0.0.1:8000/scholar_029.html	28	Composition of carbon fractions and potential denitrification in drained peat soils	http://onlinelibrary.wiley.com/doi/10.1111/j.1365-2389.1992.tb00142.x/abstract	RG Jörgensen, GM Richter	Journal of soil science	1992	Wiley Online Library	Black	SUMMARY The organic matter of five low-moor peat soils and one eutrophic raised-bog peat soil was chemically characterized by C fractionation and ion-exchange chromatography of amino acids and carbohydrates. C fractions were related to potential ...	36			http://scholar.google.co.uk/scholar?hl=en&q=%22Composition+of+carbon+fractions+and+potential+denitrification+in+drained+peat+soils%22&btnG=&as_sdt=1%2C5&as_sdtp=
285	http://127.0.0.1:8000/scholar_029.html	28	Treatment of exhaust gases from a night soil treatment plant by a combined deodorization system of activated carbon fabric reactor and peat biofilter inoculated with〈 i …	http://www.sciencedirect.com/science/article/pii/0922338X9390039B	SJ Park , M Hirai, M Shoda	Journal of fermentation and bioengineering	1993	Elsevier	Black	Abstract The exhaust gases from a night soil treatment plant were treated by a pilot-scale two-stage deodorization system consisting first of an activated carbon fabric (ACF) reactor and then a peat biofilter inoculated with Thiobacillus thioparus DW44 for a period of about ...	28			http://scholar.google.co.uk/scholar?hl=en&q=%22Treatment+of+exhaust+gases+from+a+night+soil+treatment+plant+by+a+combined+deodorization+system+of+activated+carbon+fabric+reactor+and+peat+biofilter+inoculated+with〈+i+…%22&btnG=&as_sdt=1%2C5&as_sdtp=
286	http://127.0.0.1:8000/scholar_029.html	28	How strongly can forest management influence soil carbon sequestration?	http://www.sciencedirect.com/science/article/pii/S0016706106002734	R Jandl, M Lindner, L Vesterdal , B Bauwens, R Baritz…	Geoderma	2007	Elsevier	Black	... are committed to reducing their greenhouse gas emissions. Land-use changes such as those which result from afforestation and management of fast-growing tree species, have an immediate effect on the regional rate of C sequestration by incorporating carbon dioxide (CO 2 ...	457	http://www.researchgate.net/publication/242021055_How_strongly_can_forest_management_influence_soil_carbon_sequestration/file/3deec51cc002f34f57.pdf		http://scholar.google.co.uk/scholar?hl=en&q=%22How+strongly+can+forest+management+influence+soil+carbon+sequestration?%22&btnG=&as_sdt=1%2C5&as_sdtp=
287	http://127.0.0.1:8000/scholar_029.html	28	Greenhouse impacts of the use of peat and wood for energy	http://inis.iaea.org/search/search.aspx?orig_q=RN:26029423	I Savolainen, K Hillebrand, I Nousiainen, J Sinisalo				Grey	... NITROGEN COMPOUNDS, NITROGEN OXIDES, ORGANIC COMPOUNDS, OXIDATION, OXIDES, OXYGEN COMPOUNDS DEICARBON DIOXIDE, COMBUSTION, EMISSION, GREENHOUSE EFFECT, HARVESTING, METHANE, NITROUS OXIDE, PEAT, WETLANDS, WOOD ...	37			http://scholar.google.co.uk/scholar?hl=en&q=%22Greenhouse+impacts+of+the+use+of+peat+and+wood+for+energy%22&btnG=&as_sdt=1%2C5&as_sdtp=
288	http://127.0.0.1:8000/scholar_029.html	28	The carbon balance of North American wetlands	http://link.springer.com/article/10.1672/0277-5212(2006)26%5B889:TCBONA%5D2.0.CO%3B2	SD Bridgham, JP Megonigal , JK Keller , NB Bliss…	Wetlands	2006	Springer	Black	... 2005. Greenhouse gas emissions from Canadian peat extraction, 1990–2000: A lifecycle analysis. ... International Peat Society and Geological Survey of Finland, Jyskä, Finland. ... Seasonal patterns and controls on methane and carbon dioxide fluxes in forested swamp pools. ...	326	http://ceeb.uoregon.edu/bridgham/pubpdfs/art_56.pdf		http://scholar.google.co.uk/scholar?hl=en&q=%22The+carbon+balance+of+North+American+wetlands%22&btnG=&as_sdt=1%2C5&as_sdtp=
289	http://127.0.0.1:8000/scholar_029.html	28	Carbon isotopic evidence for terminal-Permian methane outbursts and their role in extinctions of animals, plants, coral reefs, and peat swamps	http://specialpapers.gsapubs.org/content/399/249.full	GJ Retallack , ES Krull	Geological Society of America …	2006		Black	A gap in the fossil record of coals and coral reefs during the Early Triassic follows the greatest of mass extinctions at the Permian-Triassic boundary. Catastrophic methane outbursts during terminal Permian global mass extinction are indicated by organic carbon ...	38	http://blogs.uoregon.edu/gregr/files/2013/07/ragnarok-15t4q8w.pdf		http://scholar.google.co.uk/scholar?hl=en&q=%22Carbon+isotopic+evidence+for+terminal-Permian+methane+outbursts+and+their+role+in+extinctions+of+animals,+plants,+coral+reefs,+and+peat+swamps%22&btnG=&as_sdt=1%2C5&as_sdtp=
290	http://127.0.0.1:8000/scholar_029.html	28	Factors influencing methane emission from peat soils: Comparison of tropical and temperate wetlands	http://link.springer.com/article/10.1007/s10705-004-5283-8	K Inubushi, S Otake, Y Furukawa, N Shibasaki…	Nutrient cycling in …	2005	Springer	Black	Abstract Methane (CH 4) emissions from peat soils in tropical and temperate wetlands were compared. Annual CH 4 emission rates in Ozegahara, the largest wetland on Honshu main island, Japan, were higher than in drained forest wetland areas examined in Indonesia. ...	30			http://scholar.google.co.uk/scholar?hl=en&q=%22Factors+influencing+methane+emission+from+peat+soils:+Comparison+of+tropical+and+temperate+wetlands%22&btnG=&as_sdt=1%2C5&as_sdtp=
291	http://127.0.0.1:8000/scholar_026.html	29	Peatland responses to varying interannual moisture conditions as measured by automatic CO2 chambers	http://onlinelibrary.wiley.com/doi/10.1029/2002GB001946/full	J Bubier, P Crill, A Mosedale…	Global …	2003	Wiley Online Library	Black	... in the water balance because rates of CO 2 emission are significantly faster in the aerated portion of the peat profile above the ... Peatland carbon models indicate that changes in the water table affect both plant production and decomposition [Frolking et al., 2002; Wieder, 2001 ...	112	http://onlinelibrary.wiley.com/doi/10.1029/2002GB001946/full	[HTML]	http://scholar.google.co.uk/scholar?hl=en&q=%22Peatland+responses+to+varying+interannual+moisture+conditions+as+measured+by+automatic+CO2+chambers%22&btnG=&as_sdt=1%2C5&as_sdtp=
292	http://127.0.0.1:8000/scholar_026.html	29	A new model of Holocene peatland net primary production, decomposition, water balance, and peat accumulation	http://www.earth-syst-dynam-discuss.net/1/115/2010/esdd-1-115-2010.pdf	S Frolking, NT Roulet , E Tuittila …	Earth System …	2010		Black	... Peatlands have played an important role in the greenhouse gas composition in the atmosphere for most of the Holocene ... Paleo-ecological and biogeochemical studies have conjectured the role of peat- 10 lands in the Holocene dynamics of atmospheric CO2 and CH4 ...	68	http://www.earth-syst-dynam-discuss.net/1/115/2010/esdd-1-115-2010.pdf	[PDF]	http://scholar.google.co.uk/scholar?hl=en&q=%22A+new+model+of+Holocene+peatland+net+primary+production,+decomposition,+water+balance,+and+peat+accumulation%22&btnG=&as_sdt=1%2C5&as_sdtp=
293	http://127.0.0.1:8000/scholar_026.html	29	CO〈 sub〉 2〈/sub〉 exchange and Carbon balance in two grassland sites on eutrophic drained peat soils	http://hal.archives-ouvertes.fr/hal-00297896/	EM Veenendaal , O Kolle, PA Leffelaar…	Biogeosciences …	2007		Black	Abstract In this study we investigated the role of intensive and extensive dairy farm practices on CO2 exchange and the carbon balance of peatlands by means of eddy covariance (EC) measurements. Year long EC measurements were made in two adjacent farm sites on ...	37	http://hal.archives-ouvertes.fr/docs/00/29/78/96/PDF/bgd-4-1633-2007.pdf		http://scholar.google.co.uk/scholar?hl=en&q=%22CO〈+sub〉+2〈/sub〉+exchange+and+Carbon+balance+in+two+grassland+sites+on+eutrophic+drained+peat+soils%22&btnG=&as_sdt=1%2C5&as_sdtp=
294	http://127.0.0.1:8000/scholar_026.html	29	Estimate of organic carbon in world soils: II	https://dl.sciencesocieties.org/publications/sssaj/abstracts/46/5/SS0460051118	HL Bohn	Soil Science Society of America Journal	1982		Black	... Additional Index Words: carbon dioxide, carbon cycle, peat. ... C) is the largest of the carbon reservoirs—atmosphere, biomass, organic and inorganic soil carbon, lakes and rivers, and the surface ocean—which interact with the atmosphere and thereby influence CO2, but its ...	108			http://scholar.google.co.uk/scholar?hl=en&q=%22Estimate+of+organic+carbon+in+world+soils:+II%22&btnG=&as_sdt=1%2C5&as_sdtp=
295	http://127.0.0.1:8000/scholar_026.html	29	DOC budgets of drained peat catchments: implications for DOC production in peat soils	http://onlinelibrary.wiley.com/doi/10.1002/hyp.7296/full	HS Gibson, F Worrall, TP Burt…	Hydrological …	2009	Wiley Online Library	Black	Abstract The blocking of drainage ditches in peat has been proposed as a possible mitigation strategy for the widely observed increases in dissolved organic carbon (DOC) concentrations from northern peatlands. This study tested the hypothesis that drain- ...	30			http://scholar.google.co.uk/scholar?hl=en&q=%22DOC+budgets+of+drained+peat+catchments:+implications+for+DOC+production+in+peat+soils%22&btnG=&as_sdt=1%2C5&as_sdtp=
296	http://127.0.0.1:8000/scholar_026.html	29	Implications of peat accumulation at Point Escuminac, New Brunswick	http://www.sciencedirect.com/science/article/pii/S0033589483710288	BG Warner, RS Clymo , K Tolonen	Quaternary Research	1993	Elsevier	Black	... The same calculation shows the rate at which carbon dioxide and methane are produced ... The addition of peatland gases would augment greenhouse gas emissions to the atmosphere, further ... in situ methane production from acid peat in plant communities with different moisture ...	59	http://webspace.qmul.ac.uk/clymo/Clymo-article-PDFs/47-Warner-Clymo-1992-Point-Escuminac.pdf		http://scholar.google.co.uk/scholar?hl=en&q=%22Implications+of+peat+accumulation+at+Point+Escuminac,+New+Brunswick%22&btnG=&as_sdt=1%2C5&as_sdtp=
297	http://127.0.0.1:8000/scholar_026.html	29	Controls on microbial production of methane and carbon dioxide in three Sphagnum-dominated peatland ecosystems as revealed by a reciprocal field peat transplant …	http://www.tandfonline.com/doi/abs/10.1080/014904500270503	JB Yavitt , CJ Williams , RK Wieder	Geomicrobiology Journal	2000		Black	We examined controls on mineralization of carbon to methane (CH4) and carbon dioxide (CO2) in Sphagnum (moss)-dominated peatland ecosystems by transplanting surface (5 cm deep) and subsurface (40 cm deep) peat samples reciprocally among three sites for ...	35	http://127.0.0.1:8000/scholar?q=info:7jjpZiDTaE8J:scholar.google.com/&output=instlink&hl=en&as_sdt=0,5&scillfp=15464183799130859765&oi=lle		http://scholar.google.co.uk/scholar?hl=en&q=%22Controls+on+microbial+production+of+methane+and+carbon+dioxide+in+three+Sphagnum-dominated+peatland+ecosystems+as+revealed+by+a+reciprocal+field+peat+transplant+…%22&btnG=&as_sdt=1%2C5&as_sdtp=
298	http://127.0.0.1:8000/scholar_026.html	29	Development and carbon sequestration of tropical peat domes in south-east Asia: links to post-glacial sea-level changes and Holocene climate variability	http://www.sciencedirect.com/science/article/pii/S0277379111000333	R Dommain, J Couwenberg, H Joosten	Quaternary Science Reviews	2011	Elsevier	Black	Tropical peatlands of SE-Asia represent a significant terrestrial carbon reservoir of an estimated 65 Gt C. In this paper we present a comprehensive data synthesis of radiocarbon dated peat profiles and 31 basal dates of ombrogenous peat domes from the lowlands of ...	30			http://scholar.google.co.uk/scholar?hl=en&q=%22Development+and+carbon+sequestration+of+tropical+peat+domes+in+south-east+Asia:+links+to+post-glacial+sea-level+changes+and+Holocene+climate+variability%22&btnG=&as_sdt=1%2C5&as_sdtp=
299	http://127.0.0.1:8000/scholar_026.html	29	Carbon disulfide and hydrogen sulfide removal with a peat biofilter	http://www.tandfonline.com/doi/abs/10.1080/10473289.2001.10464275	T Hartikainen, J Ruuskanen…	Journal of the Air & Waste …	2001		Black	ABSTRACT Simultaneous removal of H2S and CS2 was studied with a peat biofilter inoculated with a Thiobacillus strain that oxidizes both compounds in an acidic environment. Both sulfurous gases at concentrations below 600 mg S/m3 were efficiently removed, and ...	35	http://www.tandfonline.com/doi/pdf/10.1080/10473289.2001.10464275		http://scholar.google.co.uk/scholar?hl=en&q=%22Carbon+disulfide+and+hydrogen+sulfide+removal+with+a+peat+biofilter%22&btnG=&as_sdt=1%2C5&as_sdtp=
300	http://127.0.0.1:8000/scholar_026.html	29	Denitrification and the evolution of nitrous oxide after the application of cattle slurry to a peat soil	http://link.springer.com/article/10.1007/BF00008336	SC Jarvis, DJ Hatch, BF Pain, JV Klarenbeek	Plant and Soil	1994	Springer	Black	Abstract The impact of cattle slurry on denitrification losses and nitrous oxide emission was determined on a peat soil in the Netherlands. As well as measuring losses on a day-to-day basis after three different methods of slurry application, two methods for estimating ...	34			http://scholar.google.co.uk/scholar?hl=en&q=%22Denitrification+and+the+evolution+of+nitrous+oxide+after+the+application+of+cattle+slurry+to+a+peat+soil%22&btnG=&as_sdt=1%2C5&as_sdtp=
301	http://127.0.0.1:8000/scholar_025.html	30	Plant species from mesotrophic wetlands cause relatively high methane emissions from peat soil	http://link.springer.com/article/10.1007/s11104-009-9989-x	A Koelbener, L Ström, PJ Edwards, HO Venterink	Plant and Soil	2010	Springer	Black	Abstract Plants can influence methane emissions from wetland ecosystems by altering its production, consumption and transport in the soil. The aim of this study was to investigate how eight vascular plant species from mesotrophic to eutrophic wetlands vary in their ...	36			http://scholar.google.co.uk/scholar?hl=en&q=%22Plant+species+from+mesotrophic+wetlands+cause+relatively+high+methane+emissions+from+peat+soil%22&btnG=&as_sdt=1%2C5&as_sdtp=
302	http://127.0.0.1:8000/scholar_025.html	30	The influence of raised water table levels on carbon dioxide and methane production in ditch-dissected peat grasslands in the Netherlands	http://www.sciencedirect.com/science/article/pii/S0925857497002607	EPH Best, FHH Jacobs	Ecological Engineering	1997	Elsevier	Black	The impact of hydrological manipulation on the mineralisation rates, measured as carbon dioxide and methane production rates, in the soil of the land-water transition zone of an unfertilised, Dutch peat grassland area was studied. The hydrological manipulation ...	37			http://scholar.google.co.uk/scholar?hl=en&q=%22The+influence+of+raised+water+table+levels+on+carbon+dioxide+and+methane+production+in+ditch-dissected+peat+grasslands+in+the+Netherlands%22&btnG=&as_sdt=1%2C5&as_sdtp=
303	http://127.0.0.1:8000/scholar_025.html	30	Greenhouse gas emissions from farmed organic soils: a review	http://onlinelibrary.wiley.com/doi/10.1111/j.1475-2743.1997.tb00595.x/abstract	Å Kasimir‐Klemedtsson, L Klemedtsson…	Soil use and …	1997	Wiley Online Library	Black	... Table 6 shows the estimated total national emissions of COZ and N20 from farmed organic soils, the equivalent emission of CO2, and the estimated fraction of ... 250 Greenhouse gas emissions from farmed organic soils ... Proceedings of&$h International Peat Congress, Poznan. ...	240			http://scholar.google.co.uk/scholar?hl=en&q=%22Greenhouse+gas+emissions+from+farmed+organic+soils:+a+review%22&btnG=&as_sdt=1%2C5&as_sdtp=
304	http://127.0.0.1:8000/scholar_025.html	30	Fluxes of greenhouse gases CH 4, CO 2 and N 2 O on some peat mining areas in Finland	http://inis.iaea.org/search/search.aspx?orig_q=RN:28061295	H Nykänen, PJ Martikainen, J Silvola, J Alm				Black	... are globally important stores of carbon and sources of CH4. ... OXIDES, ORGANIC COMPOUNDS, OXIDES, OXYGEN COMPOUNDS DEICARBON DIOXIDE, CARBON SINKS ... HARVESTING, METHANE, NITROGEN CYCLE, NITROUS OXIDE, PEAT, WETLANDS LanguageEnglish ...	27			http://scholar.google.co.uk/scholar?hl=en&q=%22Fluxes+of+greenhouse+gases+CH+4,+CO+2+and+N+2+O+on+some+peat+mining+areas+in+Finland%22&btnG=&as_sdt=1%2C5&as_sdtp=
305	http://127.0.0.1:8000/scholar_025.html	30	Variations in dissolved CO2 and CH4 in a first‐order stream and catchment: an investigation of soil–stream linkages	http://onlinelibrary.wiley.com/doi/10.1002/hyp.5657/abstract	D Hope, SM Palmer, MF Billett…	Hydrological …	2004	Wiley Online Library	Black	... Soil CO2 and CH4 also varied with depth. Overall, concentrations of CO2 increased with depth in riparian soils and decreased with depth in peat and mineral soils (Table II), although this was not always the case on individual sampling dates and seasons, particularly at ...	79			http://scholar.google.co.uk/scholar?hl=en&q=%22Variations+in+dissolved+CO2+and+CH4+in+a+first‐order+stream+and+catchment:+an+investigation+of+soil–stream+linkages%22&btnG=&as_sdt=1%2C5&as_sdtp=
306	http://127.0.0.1:8000/scholar_025.html	30	The methanol dehydrogenase structural gene mxaF and its use as a functional gene probe for methanotrophs and methylotrophs.	http://aem.asm.org/content/63/8/3218.short	IR McDonald , JC Murrell	Applied and Environmental …	1997	Am Soc Microbiol	Black	... Methane-oxidizing bacteria were isolated from blanket bog peat samples in 50-ml enrichment cultures that were established in 250-ml conical ... were supplied with methane by removing 50 ml of air from the headspace and injecting 60 ml of a methane- carbon dioxide mixture (95 ...	175	http://aem.asm.org/content/63/8/3218.full.pdf		http://scholar.google.co.uk/scholar?hl=en&q=%22The+methanol+dehydrogenase+structural+gene+mxaF+and+its+use+as+a+functional+gene+probe+for+methanotrophs+and+methylotrophs.%22&btnG=&as_sdt=1%2C5&as_sdtp=
307	http://127.0.0.1:8000/scholar_025.html	30	Carbon emissions from smouldering peat in shallow and strong fronts	http://www.sciencedirect.com/science/article/pii/S1540748908001594	G Rein , S Cohen, A Simeoni	Proceedings of the Combustion Institute	2009	Elsevier	Black	A series of experiments of shallow and strong smouldering fronts in boreal peat have been conducted under laboratory conditions to study the CO and CO2 emissions. Peat samples of 100mm by 100mm in cross section and 50mm in depth were smouldered in the cone ...	33	http://www.era.lib.ed.ac.uk/bitstream/1842/2613/1/Rein_PeatCarbonEmissions_PCI09.pdf		http://scholar.google.co.uk/scholar?hl=en&q=%22Carbon+emissions+from+smouldering+peat+in+shallow+and+strong+fronts%22&btnG=&as_sdt=1%2C5&as_sdtp=
308	http://127.0.0.1:8000/scholar_025.html	30	Factors influencing nitrous oxide and methane emissions from minerotrophic fens in northeast Germany	http://link.springer.com/article/10.1007/s003740050455	J Augustin, W Merbach, J Rogasik	Biology and Fertility of Soils	1998	Springer	Black	... This pa- per discusses potential factors influencing greenhouse gas emissions on such sites ... the emissions of N2O and CH4 from fens, less extensive use of peat grassland at ... J, Merbach W (1995) Einfluß von Pflanzenbewuchs und N-Angebot auf die CO2- und Lachgasemission ...	65			http://scholar.google.co.uk/scholar?hl=en&q=%22Factors+influencing+nitrous+oxide+and+methane+emissions+from+minerotrophic+fens+in+northeast+Germany%22&btnG=&as_sdt=1%2C5&as_sdtp=
309	http://127.0.0.1:8000/scholar_025.html	30	The MILLENNIA peat cohort model: predicting past, present and future soil carbon budgets and fluxes under changing climates in peatlands	http://www.researchgate.net/publication/230691205_The_MILLENNIA_peat_cohort_model_predicting_past_present_and_future_soil_carbon_budgets_and_fluxes_under_changing_climates_in_peatlands/file/9fcfd50323d356e5bc.pdf	A Heinemeyer, S Croft, MH Garnett, E Gloor , J Holden …	Clim. Res	2010	researchgate.net	Black	ABSTRACT: Globally, considerable carbon (C) is stored in soils, particularly in peatlands. These stores play a potentially significant role in atmospheric C-cycle feedbacks, and thus need to be accounted for in global models. However, present global soil models do not ...	23	http://www.researchgate.net/publication/230691205_The_MILLENNIA_peat_cohort_model_predicting_past_present_and_future_soil_carbon_budgets_and_fluxes_under_changing_climates_in_peatlands/file/9fcfd50323d356e5bc.pdf	[PDF]	http://scholar.google.co.uk/scholar?hl=en&q=%22The+MILLENNIA+peat+cohort+model:+predicting+past,+present+and+future+soil+carbon+budgets+and+fluxes+under+changing+climates+in+peatlands%22&btnG=&as_sdt=1%2C5&as_sdtp=
310	http://127.0.0.1:8000/scholar_025.html	30	Halogen retention, organohalogens, and the role of organic matter decomposition on halogen enrichment in two Chilean peat bogs	http://pubs.acs.org/doi/abs/10.1021/es0348492	H Biester, F Keppler , A Putschew…	… science & technology	2004	ACS Publications	Black	... Determination of Carbon and Nitrogen in Peat. Carbon ... deposition. However, increased ac cumulation rates can also be an effect of differences in mass accumulation caused by mass losses (carbon loss) during peat evolution (28). ...	77			http://scholar.google.co.uk/scholar?hl=en&q=%22Halogen+retention,+organohalogens,+and+the+role+of+organic+matter+decomposition+on+halogen+enrichment+in+two+Chilean+peat+bogs%22&btnG=&as_sdt=1%2C5&as_sdtp=
311	http://127.0.0.1:8000/scholar_030.html	31	Understanding Holocene peat accumulation pattern of continental fens in western Canada	http://www.nrcresearchpress.com/doi/abs/10.1139/b03-016	Z Yu, DH Vitt, ID Campbell …	Canadian Journal of …	2003	NRC Research Press	Black	... The objectives of the study are to (i) derive the devel- opment history for a peatland during the Holocene, (ii) doc- ument at a ... tion rates (PAR), and (iv) discuss the implications of this conceptual model for simulation models and for projecting future peat carbon dynamics under ...	69	http://www.cfs.nrcan.gc.ca/pubwarehouse/pdfs/21489.pdf		http://scholar.google.co.uk/scholar?hl=en&q=%22Understanding+Holocene+peat+accumulation+pattern+of+continental+fens+in+western+Canada%22&btnG=&as_sdt=1%2C5&as_sdtp=
312	http://127.0.0.1:8000/scholar_030.html	31	Methane flux from Minnesota peatlands	http://onlinelibrary.wiley.com/doi/10.1029/GB002i004p00371/full	PM Crill, KB Bartlett, RC Harriss…	Global …	1988	Wiley Online Library	Black	... This method yielded a total net CH4 flux. Methane concentrations in pore waters of the peat col- umn were determined by sampling a series of depths with 60-mL plastic syringes with stopcocks, attached to a 1/8" stainless steel tube with grooves hack sawed into the bot- tom 1 ...	412	http://conservancy.umn.edu/bitstream/148414/1/Methane%20flux.pdf		http://scholar.google.co.uk/scholar?hl=en&q=%22Methane+flux+from+Minnesota+peatlands%22&btnG=&as_sdt=1%2C5&as_sdtp=
313	http://127.0.0.1:8000/scholar_030.html	31	The presence of micro-organisms in various strata of deep tropical peat deposits		SA Visser	Life Sciences	1964	Pergamon	Black		9		[CITATION]	http://scholar.google.co.uk/scholar?hl=en&q=%22The+presence+of+micro-organisms+in+various+strata+of+deep+tropical+peat+deposits%22&btnG=&as_sdt=1%2C5&as_sdtp=
314	http://127.0.0.1:8000/scholar_030.html	31	Effect of organic matter application on methane emission from some Japanese paddy fields	http://www.tandfonline.com/doi/abs/10.1080/00380768.1990.10416797	K Yagi, K Minami	Soil Science and Plant Nutrition	1990		Black	... Methane Emission from Japanese Paddy Fields ... The lower slope of the data of Andosols, therefore, indicates a lower CH4 : CO2 ratio of the decomposition products in ... The groups of Andosols are distributed in 12% of the Japanese paddy fields, while Peat soil accounts for less ...	558	http://www.tandfonline.com/doi/pdf/10.1080/00380768.1990.10416797		http://scholar.google.co.uk/scholar?hl=en&q=%22Effect+of+organic+matter+application+on+methane+emission+from+some+Japanese+paddy+fields%22&btnG=&as_sdt=1%2C5&as_sdtp=
315	http://127.0.0.1:8000/scholar_030.html	31	Porosity of coals and coal products	http://www.osti.gov/scitech/biblio/7016903	OP Mahajan, PL Walker Jr			osti.gov	Grey	... Nitrogen areas of most coals on both sides of this carbon content range are usually less than 1 m2/gm. Carbon dioxide surface areas of coals of all ranks are higher than 100 m2/gm. There is a general decrease in co 2 area with decrease in carbon ...	60		[CITATION]	http://scholar.google.co.uk/scholar?hl=en&q=%22Porosity+of+coals+and+coal+products%22&btnG=&as_sdt=1%2C5&as_sdtp=
316	http://127.0.0.1:8000/scholar_030.html	31	Biofuel plantations on forested lands: double jeopardy for biodiversity and climate	http://onlinelibrary.wiley.com/doi/10.1111/j.1523-1739.2008.01096.x/full	F Danielsen , H Beukema, ND Burgess …	Conservation …	2009	Wiley Online Library	Black	... f fire-agb , factor for additional emission of other GHG than CO 2 from burning of the ... organic matter by oxidation following drainage prior to planting is likely to exceed greenhouse gas emission from ... We assumed the entire stock of peat is decomposed over the life of repeated oil ...	272	http://www.ibcperu.org/doc/isis/mas/9640.pdf		http://scholar.google.co.uk/scholar?hl=en&q=%22Biofuel+plantations+on+forested+lands:+double+jeopardy+for+biodiversity+and+climate%22&btnG=&as_sdt=1%2C5&as_sdtp=
317	http://127.0.0.1:8000/scholar_030.html	31	A 6000-year record of changes in drought and precipitation in northeastern China based on a δ〈 sup〉 13〈/sup〉 C time series from peat cellulose	http://www.sciencedirect.com/science/article/pii/S0012821X00003678	YT Hong, ZG Wang , HB Jiang, QH Lin, B Hong…	Earth and Planetary …	2001	Elsevier	Black	... A high-resolution record of atmospheric CO 2 content from carbon isotopes in peat. Nature, 365 (1994), pp. 153–156. ... Preparation of carbon dioxide for stable carbon isotope analysis of petroleum fractions. Anal. Chem., 52 (1980), pp. 1389–1391. ...	162	http://210.38.138.6:9020/editor/UploadFile/A%206000-year%20record%20of%20changes%20in%20drought%20and%20precipitation%20in%20northeastern%20China%20based%20on%20a%20%CE%B413C%20time%20series%20from%20peat%20cellulose%20.pdf		http://scholar.google.co.uk/scholar?hl=en&q=%22A+6000-year+record+of+changes+in+drought+and+precipitation+in+northeastern+China+based+on+a+δ〈+sup〉+13〈/sup〉+C+time+series+from+peat+cellulose%22&btnG=&as_sdt=1%2C5&as_sdtp=
318	http://127.0.0.1:8000/scholar_030.html	31	Controls on CH4 emissions from a northern peatland	http://onlinelibrary.wiley.com/doi/10.1029/1998GB900021/full	LM Bellisario, JL Bubier, TR Moore…	Global …	1999	Wiley Online Library	Black	... Determination of isotopic signatures in peat pore water CH4 revealed average/•13C values of between ... 388%o. Sites with large CH 4 emission rates also had high CO2 exchange rates ... Comparison of/•D and/•3C signatures in pore water CH4 revealed a slope shallow enough to ...	222	http://onlinelibrary.wiley.com/doi/10.1029/1998GB900021/pdf		http://scholar.google.co.uk/scholar?hl=en&q=%22Controls+on+CH4+emissions+from+a+northern+peatland%22&btnG=&as_sdt=1%2C5&as_sdtp=
319	http://127.0.0.1:8000/scholar_030.html	31	Emission of CO2 from agricultural peat soils in the Netherlands and ways to limit this emission	http://www.waarheenmethetveen.nl/data/IPC2008_vandenakker.pdf	JJH Van den Akker, PJ Kuikman …	… International Peat …	2008	waarheenmethetveen.nl	Conference	Summary A method to calculate CO2 emissions from subsidence was developed. Empirical relationships between ditchwater and groundwater levels and subsidence were derived based on monitoring results collected during more than 30 years. With these relationships, ...	21	http://www.waarheenmethetveen.nl/data/IPC2008_vandenakker.pdf	[PDF]	http://scholar.google.co.uk/scholar?hl=en&q=%22Emission+of+CO2+from+agricultural+peat+soils+in+the+Netherlands+and+ways+to+limit+this+emission%22&btnG=&as_sdt=1%2C5&as_sdtp=
320	http://127.0.0.1:8000/scholar_030.html	31	Methane dynamics in peat : Importance of shallow peats and a novel reduced‐complexity approach for modeling ebullition	http://onlinelibrary.wiley.com/doi/10.1029/2008GM000811/summary	TJ Coulthard , AJ Baird, J Ramirez…	Carbon Cycling in …	2009	Wiley Online Library	Black	Northern peatlands are one of the largest natural sources of atmospheric methane (CH4), and it is important to understand the mechanisms of CH4 loss from these peatlands so that future rates of CH4 emission can be predicted. CH4 is lost to the atmosphere from ...	33	http://www.agu.org/books/gm/v184/2008GM000811/2008GM000811.pdf		http://scholar.google.co.uk/scholar?hl=en&q=%22Methane+dynamics+in+peat+:+Importance+of+shallow+peats+and+a+novel+reduced‐complexity+approach+for+modeling+ebullition%22&btnG=&as_sdt=1%2C5&as_sdtp=
321	http://127.0.0.1:8000/scholar_028.html	32	Sensitivity of northern peatland carbon dynamics to Holocene climate change	http://onlinelibrary.wiley.com/doi/10.1029/2008GM000822/summary	Z Yu, DW Beilman, MC Jones	Carbon cycling in northern …	2009	Wiley Online Library	Black	... contributed to the peak in atmospheric CH4 and the decrease in CO2 concentrations in the ... Owing to their large accumulated C mass and dynamic greenhouse gas fluxes, these ecosystems have ... Peatland ecosystems and their C-rich peat archives have been studied for several ...	62	http://www.agu.org/books/gm/v184/2008GM000822/2008GM000822.pdf		http://scholar.google.co.uk/scholar?hl=en&q=%22Sensitivity+of+northern+peatland+carbon+dynamics+to+Holocene+climate+change%22&btnG=&as_sdt=1%2C5&as_sdtp=
322	http://127.0.0.1:8000/scholar_028.html	32	Batch lead (II) removal from aqueous solution by peat : equilibrium and kinetics	http://www.sciencedirect.com/science/article/pii/S0957582099707950	YS Ho, G McKay	Process Safety and Environmental Protection	1999	Elsevier	Black	... An evaluation of single resistance transfer models in the sorption of metal ions by peat. J of Chem Technol and Biotechnol, 54 (1992), pp. 271–276. 41. A. López-delgado, C. Pérez, FA Lopez; The influence of carbon content of blast furnace sludges and coke on the adsorption of ...	111	http://dns2.asia.edu.tw/~ysho/YSHO-English/Publications/PDF/Pro%20Saf%20Env%20Pro77B,%20165.pdf		http://scholar.google.co.uk/scholar?hl=en&q=%22Batch+lead+(II)+removal+from+aqueous+solution+by+peat+:+equilibrium+and+kinetics%22&btnG=&as_sdt=1%2C5&as_sdtp=
323	http://127.0.0.1:8000/scholar_028.html	32	Characterization of gasification reactivity of peat char in pressurized conditions: effect of product gas inhibition and inorganic material	http://www.sciencedirect.com/science/article/pii/0016236196001056	A Moilanen, HJ Mühlen	Fuel	1996	Elsevier	Black	... rate vs. char burnoff. The steam gasification rate of peat char was only slightly higher than the CO 2 gasification rate, and the gasification rates decreased at increasing pressure in both steam and carbon dioxide. The steam ...	36			http://scholar.google.co.uk/scholar?hl=en&q=%22Characterization+of+gasification+reactivity+of+peat+char+in+pressurized+conditions:+effect+of+product+gas+inhibition+and+inorganic+material%22&btnG=&as_sdt=1%2C5&as_sdtp=
324	http://127.0.0.1:8000/scholar_028.html	32	UK land use and soil carbon sequestration	http://www.sciencedirect.com/science/article/pii/S0264837709000945	NJ Ostle, PE Levy, CD Evans , P Smith	Land Use Policy	2009	Elsevier	Black	... current knowledge of existing UK land carbon stocks, carbon sequestration and associated greenhouse gas fluxes ... of plant matter and carbon loss, by natural biological conversion to carbon dioxide and methane ... Cruickshank et al., 1998), with 42 percent of this found in peat soils ...	82	http://www.dti.gov.uk/assets/foresight/docs/land-use/jlup/31_uk_land_use_and_soil_carbon_sequestration.pdf		http://scholar.google.co.uk/scholar?hl=en&q=%22UK+land+use+and+soil+carbon+sequestration%22&btnG=&as_sdt=1%2C5&as_sdtp=
325	http://127.0.0.1:8000/scholar_028.html	32	Dissolved organic carbon and disinfection by-product precursor release from managed peat soils	https://dl.sciencesocieties.org/publications/jeq/abstracts/33/2/465	JA Fleck, DA Bossio, R Fujii	Journal of environmental …	2004		Black	Abstract A wetland restoration demonstration project examined the effects of a permanently flooded wetland on subsidence of peat soils. The project, started in 1997, was done on Twitchell Island, in the Sacramento–San Joaquin Delta of California. Conversion of ...	32	ftp://136.200.241.91/mailout/West%20Delta%20Research%20Documents/Fleck%20et%20al%202004.pdf		http://scholar.google.co.uk/scholar?hl=en&q=%22Dissolved+organic+carbon+and+disinfection+by-product+precursor+release+from+managed+peat+soils%22&btnG=&as_sdt=1%2C5&as_sdtp=
326	http://127.0.0.1:8000/scholar_028.html	32	The carbon content of soil and its geographical distribution in Great Britain	http://onlinelibrary.wiley.com/doi/10.1111/j.1475-2743.1995.tb00488.x/abstract	PJA Howard, PJ Loveland, RI Bradley…	Soil Use and …	1995	Wiley Online Library	Black	... Keywords: Carbon, soil, peat, distribution, carbon ... 0.0-1.0 m 1.0-2.0 m Total Under agriculture (A + P) (c) Blanket peat organic carbon by depth to 1.00 m to 1.25 m to 1.50 m to 1.75 m to 2.00 m to 2.50 m to 3.50 m to 4.00 m 182-910 200 100 140 180 420 80 120 200 in2 338 ...	119			http://scholar.google.co.uk/scholar?hl=en&q=%22The+carbon+content+of+soil+and+its+geographical+distribution+in+Great+Britain%22&btnG=&as_sdt=1%2C5&as_sdtp=
327	http://127.0.0.1:8000/scholar_028.html	32	Mass spectrometric monitoring of gases ( CO2 , CH4 , O2) in a mesotrophic peat core from Kopparås Mire, Sweden	http://onlinelibrary.wiley.com/doi/10.1046/j.1365-2486.2001.00396.x/full	M Beckmann, D Lloyd	Global Change Biology	2001	Wiley Online Library	Black	Abstract Membrane inlet mass spectrometry was used to monitor dissolved gas concentrations (CO2, CH4 and O2) in a mesotrophic peat core from KopparaÊs, Sweden. 1 A comparison of depth pro® les (down to 22cm) with an ombrotrophic peat core ( ...	29	http://127.0.0.1:8000/scholar?q=info:GEKR8j4-xZgJ:scholar.google.com/&output=instlink&hl=en&as_sdt=0,5&scillfp=14447246240039651257&oi=lle		http://scholar.google.co.uk/scholar?hl=en&q=%22Mass+spectrometric+monitoring+of+gases+(+CO2+,+CH4+,+O2)+in+a+mesotrophic+peat+core+from+Kopparås+Mire,+Sweden%22&btnG=&as_sdt=1%2C5&as_sdtp=
328	http://127.0.0.1:8000/scholar_028.html	32	Greenhouse gas emissions from managed peat soils: is the IPCC reporting guidance realistic	http://pixelrauschen.de/wbmp/media/map08/map_08_02.pdf	J Couwenberg	Mires and Peat	2011	pixelrauschen.de	Black	SUMMARY Drainage of peatlands leads to the decomposition of peat, resulting in substantial losses of carbon and nitrogen to the atmosphere. The conservation and restoration of peatlands can provide a major contribution to the mitigation of climate ...	27	http://pixelrauschen.de/wbmp/media/map08/map_08_02.pdf	[PDF]	http://scholar.google.co.uk/scholar?hl=en&q=%22Greenhouse+gas+emissions+from+managed+peat+soils:+is+the+IPCC+reporting+guidance+realistic%22&btnG=&as_sdt=1%2C5&as_sdtp=
329	http://127.0.0.1:8000/scholar_028.html	32	Methane release from peat soils: effects of〈 i〉 Sphagnum〈/i〉 and〈 i〉 Juncus〈/i〉		M Roura-Carol, C Freeman	Soil Biology and Biochemistry	1999	Pergamon	Black		27		[CITATION]	http://scholar.google.co.uk/scholar?hl=en&q=%22Methane+release+from+peat+soils:+effects+of〈+i〉+Sphagnum〈/i〉+and〈+i〉+Juncus〈/i〉%22&btnG=&as_sdt=1%2C5&as_sdtp=
330	http://127.0.0.1:8000/scholar_028.html	32	Remotely sensed evidence of tropical peatland conversion to oil palm	http://www.pnas.org/content/108/12/5127.short	LP Koh , J Miettinen, SC Liew …	Proceedings of the …	2011	National Acad Sciences	Black	... 38 million Mg of biomass carbon (roughly equivalent to annual greenhouse gas emissions from ... palm development did result in substantial, albeit variable, biodiversity and carbon impacts across ... requirements before a new planting, including the drainage of the peat swamp (20 ...	106	http://www.pnas.org/content/108/12/5127.full		http://scholar.google.co.uk/scholar?hl=en&q=%22Remotely+sensed+evidence+of+tropical+peatland+conversion+to+oil+palm%22&btnG=&as_sdt=1%2C5&as_sdtp=
331	http://127.0.0.1:8000/scholar_032.html	33	Sulfate deposition and temperature controls on methane emission and sulfur forms in peat	http://link.springer.com/article/10.1007/s10533-004-9681-4	V Gauci , D Fowler , SJ Chapman, NB Dise	Biogeochemistry	2004	Springer	Black	Abstract Natural wetlands are the single most important contributors of methane (CH 4) to the atmosphere. Recent research has shown that the deposition of sulfate (SO 4 2-) can substantially reduce the emission of this radiatively important gas from wetlands. However ...	30	http://cepsar.open.ac.uk/pers/v.gauci/pics/d39284.pdf		http://scholar.google.co.uk/scholar?hl=en&q=%22Sulfate+deposition+and+temperature+controls+on+methane+emission+and+sulfur+forms+in+peat%22&btnG=&as_sdt=1%2C5&as_sdtp=
332	http://127.0.0.1:8000/scholar_032.html	33	Late Holocene paleoecohydrology and carbon accumulation estimates from two boreal peat bogs in eastern Canada: Potential and limits of multi-proxy archives	http://www.sciencedirect.com/science/article/pii/S0031018210001483	J Loisel, M Garneau	Palaeogeography	2010	Elsevier	Black	The stratigraphy of four peat sequences collected in two peat bogs located in the Eastmain River watershed (52° N, 76° W), James Bay lowlands, Québec, Canada, was investigated to reconstruct past hydroclimatic conditions of peat accumulation and associated carbon ...	29	http://geotop.uqam.ca/pdf/garneauM/Loisel_and_Garneau_PPP_2010.pdf		http://scholar.google.co.uk/scholar?hl=en&q=%22Late+Holocene+paleoecohydrology+and+carbon+accumulation+estimates+from+two+boreal+peat+bogs+in+eastern+Canada:+Potential+and+limits+of+multi-proxy+archives%22&btnG=&as_sdt=1%2C5&as_sdtp=
333	http://127.0.0.1:8000/scholar_032.html	33	Methane emissions from western Siberian wetlands: heterogeneity and sensitivity to climate change	http://iopscience.iop.org/1748-9326/2/4/045015	TJ Bohn , DP Lettenmaier , K Sathulur…	Environmental …	2007		Black	... In reality, the mineral soils outside present-day bogs tend to have lower peat content, and thus lower porosity than the values we used in our simulations. ... Res. Lett. 30 (7) 1414 CrossRef Crill PM 1991 Seasonal patterns of methane uptake and carbon dioxide release by ...	73	http://iopscience.iop.org/1748-9326/2/4/045015/fulltext/		http://scholar.google.co.uk/scholar?hl=en&q=%22Methane+emissions+from+western+Siberian+wetlands:+heterogeneity+and+sensitivity+to+climate+change%22&btnG=&as_sdt=1%2C5&as_sdtp=
334	http://127.0.0.1:8000/scholar_032.html	33	Effect of peat quality on microbial greenhouse gas formation in an acidic fen	http://www.biogeosciences.net/7/187/2010/bg-7-187-2010.pdf	M Reiche, G Gleixner, K Küsel	Biogeosciences	2010	biogeosciences.net	Black	Abstract. Peatlands play an important role in the global carbon cycle and represent both an important stock of soil carbon and a substantial natural source of relevant greenhouse gases like CO2 and CH4. While it is known that the quality of organic matter affects microbial ...	19	http://www.biogeosciences.net/7/187/2010/bg-7-187-2010.pdf	[PDF]	http://scholar.google.co.uk/scholar?hl=en&q=%22Effect+of+peat+quality+on+microbial+greenhouse+gas+formation+in+an+acidic+fen%22&btnG=&as_sdt=1%2C5&as_sdtp=
335	http://127.0.0.1:8000/scholar_032.html	33	The particulate methane monooxygenase gene pmoA and its use as a functional gene probe for methanotrophs	http://onlinelibrary.wiley.com/doi/10.1111/j.1574-6968.1997.tb12728.x/full	IR McDonald , JC Murrell	FEMS microbiology letters	1997	Wiley Online Library	Black	... Methane oxidising bacteria were isolated from blanket bog peat samples in 50 ml enrichment cultures, established in 250 ml conical flasks sealed ... supplied with methane by removing 50 ml of air from the headspace and injecting 60 ml of a methane-carbon dioxide mixture (95:5 ...	117	http://onlinelibrary.wiley.com/doi/10.1111/j.1574-6968.1997.tb12728.x/full	[HTML]	http://scholar.google.co.uk/scholar?hl=en&q=%22The+particulate+methane+monooxygenase+gene+pmoA+and+its+use+as+a+functional+gene+probe+for+methanotrophs%22&btnG=&as_sdt=1%2C5&as_sdtp=
336	http://127.0.0.1:8000/scholar_032.html	33	EVALUATING EVERGLADES PEAT CARBON LOSS USING GEOSPATIAL TECHNIQUES.		S Aich, TW Dreschel	Florida Scientist			Black		3		[CITATION]	http://scholar.google.co.uk/scholar?hl=en&q=%22EVALUATING+EVERGLADES+PEAT+CARBON+LOSS+USING+GEOSPATIAL+TECHNIQUES.%22&btnG=&as_sdt=1%2C5&as_sdtp=
337	http://127.0.0.1:8000/scholar_032.html	33	Methane production and oxidation potentials in relation to water table fluctuations in two boreal mires	http://www.sciencedirect.com/science/article/pii/S0038071799000930	A Kettunen, V Kaitala, A Lehtinen, A Lohila…	Soil Biology and …	1999	Elsevier	Black	... Methane-producing bacteria require anoxic conditions (Sundh et al., 1994) and a suitable carbon source: acetate or carbon dioxide and molecular hydrogen (Valentine et al., 1994). The oxygen concentration in peat decreases downwards while the new carbon which can be ...	128	http://lib.tkk.fi/Diss/2003/isbn9512263041/article4.pdf		http://scholar.google.co.uk/scholar?hl=en&q=%22Methane+production+and+oxidation+potentials+in+relation+to+water+table+fluctuations+in+two+boreal+mires%22&btnG=&as_sdt=1%2C5&as_sdtp=
338	http://127.0.0.1:8000/scholar_032.html	33	Carbon accumulation and storage in mineral subsoil beneath peat	https://dl.sciencesocieties.org/publications/sssaj/abstracts/68/2/690	TR Moore, J Turunen	Soil Science Society of America …	2004		Black	Abstract We showed that sandy subsoils beneath peat near Ramsey Lake, MI, contained 7.5 to 8.0 kg organic C (OC) m− 2 to a depth of 70 cm, compared with 1.6 to 3.6 kg m− 2 in adjacent forest soils, from which the peatland had evolved through paludification. ...	30			http://scholar.google.co.uk/scholar?hl=en&q=%22Carbon+accumulation+and+storage+in+mineral+subsoil+beneath+peat%22&btnG=&as_sdt=1%2C5&as_sdtp=
339	http://127.0.0.1:8000/scholar_032.html	33	Moisture dependence of CO2 exchange and its recovery after drying in certain boreal forest and peat mosses	http://agris.fao.org/agris-search/search.do?recordID=US201301786599	J Silvola	Lindbergia	1991		Black	English. Español. Français. العربية. 中文. Русский. agris. About: How it works; AGRIS centers; For contributors; Acceptable use policy. Feedback: rdf logo rdf logo. Translate with Translator. This translation tool is powered by Google. ...	40		[CITATION]	http://scholar.google.co.uk/scholar?hl=en&q=%22Moisture+dependence+of+CO2+exchange+and+its+recovery+after+drying+in+certain+boreal+forest+and+peat+mosses%22&btnG=&as_sdt=1%2C5&as_sdtp=
340	http://127.0.0.1:8000/scholar_032.html	33	Peat oxidation in an abandoned cutover peatland	http://pubs.aic.ca/doi/abs/10.4141/S01-043	JM Waddington , P McNeil	Canadian Journal of Soil Science	2002		Black	... 2012. Emissions of CO2, CH4 and N2O from undisturbed, drained and mined peatlands in Estonia. Hydrobiologia 692:1, 41-55. ... 2012. Reed canary grass cultivation mitigates greenhouse gas emissions from abandoned peat extraction areas. GCB Bioenergy 4:4, 462-474. ...	33	http://www.gret-perg.ulaval.ca/uploads/tx_centrerecherche/Waddington_CanJSoilSc_2002_01.pdf		http://scholar.google.co.uk/scholar?hl=en&q=%22Peat+oxidation+in+an+abandoned+cutover+peatland%22&btnG=&as_sdt=1%2C5&as_sdtp=
341	http://127.0.0.1:8000/scholar_031.html	34	Current disturbance and the diminishing peatland carbon sink	http://onlinelibrary.wiley.com/doi/10.1029/2001GL014000/full	M Turetsky, K Wieder, L Halsey …	Geophysical Research …	2002	Wiley Online Library	Black	... IAEA advisory group meeting on assessment of greenhouse gas emissions from the full energy chain for hydropower, nuclear power ... Keyes, D., Canadian Peat Moss and ... I., M. Nilsson, C. Mikkela, G. Granberg, and BH Svensson, Fluxes of methane and carbon dioxide on peat ...	122	http://onlinelibrary.wiley.com/doi/10.1029/2001GL014000/full	[HTML]	http://scholar.google.co.uk/scholar?hl=en&q=%22Current+disturbance+and+the+diminishing+peatland+carbon+sink%22&btnG=&as_sdt=1%2C5&as_sdtp=
342	http://127.0.0.1:8000/scholar_031.html	34	Climate regulation of fire emissions and deforestation in equatorial Asia	http://www.pnas.org/content/105/51/20350.short	GR Van der Werf , J Dempewolf…	Proceedings of the …	2008	National Acad Sciences	Black	... Drought, in turn, accelerates forest clearing and emissions from peat fires, further increasing atmospheric greenhouse gas levels in a positive feedback loop. One unique feature of the carbon–climate feedback described here is the human component; because humans set most ...	149	http://www.pnas.org/content/105/51/20350.full		http://scholar.google.co.uk/scholar?hl=en&q=%22Climate+regulation+of+fire+emissions+and+deforestation+in+equatorial+Asia%22&btnG=&as_sdt=1%2C5&as_sdtp=
343	http://127.0.0.1:8000/scholar_031.html	34	Dynamics of soil carbon during deglaciation of the Laurentide ice sheet	http://www.sciencemag.org/content/258/5090/1921.short	JW Harden, RK Mark, ET Sundquist, RF Stallard	Science	1992	sciencemag.org	Black	... Sequestration of carbon in deglaciated peat lands continues today, and a steady state has not been reached. The natural rate of carbon sequestration in soils, however, is small relative to the rate of anthropogenic carbon dioxide production. Received for publication 8 July 1992. ...	165			http://scholar.google.co.uk/scholar?hl=en&q=%22Dynamics+of+soil+carbon+during+deglaciation+of+the+Laurentide+ice+sheet%22&btnG=&as_sdt=1%2C5&as_sdtp=
344	http://127.0.0.1:8000/scholar_031.html	34	Filling holes in regional carbon budgets: Predicting peat depth in a north temperate lake district	http://onlinelibrary.wiley.com/doi/10.1029/2009JG001034/full	I Buffam , SR Carpenter , W Yeck …	Journal of …	2010	Wiley Online Library	Black	[2] Peatlands have long been recognized as providing a wide range of ecosystem services valuable to humans [Huels, 1915; Soper, 1917]. In recent decades their role in the global climate and particularly their importance in longterm carbon (C) sequestration has come ...	23	http://onlinelibrary.wiley.com/doi/10.1029/2009JG001034/full	[HTML]	http://scholar.google.co.uk/scholar?hl=en&q=%22Filling+holes+in+regional+carbon+budgets:+Predicting+peat+depth+in+a+north+temperate+lake+district%22&btnG=&as_sdt=1%2C5&as_sdtp=
345	http://127.0.0.1:8000/scholar_031.html	34	Carbon Flow and Budget in Young Mature Oil Palm Agroecosystem on Deep Tropical Peat	http://www.geog.le.ac.uk/carbopeat/media/pdf/yogyapapers/p43.pdf	L Melling , KJ Goh, C Beauvais, R Hatano	Planter	2008		Black	SUMMARY An increasing area of deep tropical peat in Sarawak, which has been logged- over, is being cultivated with oil palm, generating revenue of about US 1 billion in 2006 for much needed socio-economic development. However, there is growing concern with this ...	23	http://www.geog.le.ac.uk/carbopeat/media/pdf/yogyapapers/p43.pdf	[PDF]	http://scholar.google.co.uk/scholar?hl=en&q=%22Carbon+Flow+and+Budget+in+Young+Mature+Oil+Palm+Agroecosystem+on+Deep+Tropical+Peat%22&btnG=&as_sdt=1%2C5&as_sdtp=
346	http://127.0.0.1:8000/scholar_031.html	34	Identification of the functionally active methanotroph population in a peat soil microcosm by stable-isotope probing	http://aem.asm.org/content/68/3/1446.short	SA Morris, S Radajewski, TW Willison…	Applied and …	2002	Am Soc Microbiol	Black	... type II methanotrophs were identified, indicating that these methanotrophs were active in peat exposed to ... It is estimated that 400 to 640 Tg of methane (CH 4 ) is produced ... at the anaerobic-aerobic interface, thereby mitigating the global emissions of this greenhouse gas into ...	180	http://aem.asm.org/content/68/3/1446.full		http://scholar.google.co.uk/scholar?hl=en&q=%22Identification+of+the+functionally+active+methanotroph+population+in+a+peat+soil+microcosm+by+stable-isotope+probing%22&btnG=&as_sdt=1%2C5&as_sdtp=
347	http://127.0.0.1:8000/scholar_031.html	34	The global influence of the hydrogen iostope composition of water on that of bacteriogenic methane from shallow freshwater environments	http://www.sciencedirect.com/science/article/pii/S0016703799001921	S Waldron, JM Lansdown, EM Scott, AE Fallick…	… et Cosmochimica Acta	1999	Elsevier	Black	... the most common being from the breakdown acetate or by the reduction of carbon dioxide. ... Transition zone methane is also more D-enriched than that sampled from most shallow ... Third, radio-isotope tracer experiments in peat columns showed methane was produced by CO 2 ...	59			http://scholar.google.co.uk/scholar?hl=en&q=%22The+global+influence+of+the+hydrogen+iostope+composition+of+water+on+that+of+bacteriogenic+methane+from+shallow+freshwater+environments%22&btnG=&as_sdt=1%2C5&as_sdtp=
348	http://127.0.0.1:8000/scholar_031.html	34	ADSORPTION OF CYANAZINE ON PEAT AND MONTMORILLONITE CLAY SURFACES1.	http://journals.lww.com/soilsci/Abstract/1990/12000/ADSORPTION_OF_CYANAZINE_ON_PEAT_AND.2.aspx	GD Cancela, ER Taboada, F Sanchez-Rasero	Soil Science	1990		Black	... Page 6. CYANAZINE ON PEAT AND MONTMORILLONITE SURFACES 841 210! 0 10 20 30 ¿0 50 60 70 80 Ce ng'rril	26			http://scholar.google.co.uk/scholar?hl=en&q=%22ADSORPTION+OF+CYANAZINE+ON+PEAT+AND+MONTMORILLONITE+CLAY+SURFACES1.%22&btnG=&as_sdt=1%2C5&as_sdtp=
349	http://127.0.0.1:8000/scholar_031.html	34	Patterns of change in the carbon balance of organic soil-wetlands of the temperate zone	http://www.jstor.org/stable/2260396	TV Armentano, ES Menges	The Journal of Ecology	1986	JSTOR	Black	... (6) Peat combustion for fuel released 32-39 Mt of carbon annually, nearly all in the USSR A total of 590-700 Mt of carbon has been released from peat combustion since 1795 ... to the global rise in atmospheric CO2. ... sinks by accumulating carbon dioxide from the atmosphere. ...	392			http://scholar.google.co.uk/scholar?hl=en&q=%22Patterns+of+change+in+the+carbon+balance+of+organic+soil-wetlands+of+the+temperate+zone%22&btnG=&as_sdt=1%2C5&as_sdtp=
350	http://127.0.0.1:8000/scholar_031.html	34	Ecosystem and physiological controls over methane production in northern wetlands	http://onlinelibrary.wiley.com/doi/10.1029/93JD00391/full	DW Valentine, EA Holland…	Journal of Geophysical …	1994	Wiley Online Library	Black	... surface peat slurries, methane production rates increased (Figure 3a) and carbon dioxide production rates decreased in the presence of ethanol, although neither response was significant (p>0.1). However, the proportion of respired carbon evolving as methane (ie, CH4/CO2) ...	183			http://scholar.google.co.uk/scholar?hl=en&q=%22Ecosystem+and+physiological+controls+over+methane+production+in+northern+wetlands%22&btnG=&as_sdt=1%2C5&as_sdtp=
351	http://127.0.0.1:8000/scholar_036.html	35	Biofuels and the need for additional carbon	http://iopscience.iop.org/1748-9326/5/2/024007	TD Searchinger	Environmental Research Letters	2010		Black	... copenhagen-r_b_385784.html February 17 [19] Searchinger T et al 2008 Use of US croplands for biofuels increases greenhouse gas emissions through ... 1 60–4 CrossRef [24] Hooijer A, Silvius M, Wösten H and Page S 2006 PEAT-CO 2 , Assessment of CO2 emissions from ...	85	http://coophigh.com/app/download/4745835304/Bio+Fuels.pdf		http://scholar.google.co.uk/scholar?hl=en&q=%22Biofuels+and+the+need+for+additional+carbon%22&btnG=&as_sdt=1%2C5&as_sdtp=
352	http://127.0.0.1:8000/scholar_036.html	35	Increased temperature sensitivity of net DOC production from ombrotrophic peat due to water table draw‐down	http://onlinelibrary.wiley.com/doi/10.1111/j.1365-2486.2008.01683.x/full	JM Clark , D Ashley, M Wagner…	Global change …	2009	Wiley Online Library	Black	Abstract The production and release of dissolved organic carbon (DOC) from peat soils is thought to be sensitive to changes in climate, specifically changes in temperature and rainfall. However, little is known about the actual rates of net DOC production in response ...	31	http://127.0.0.1:8000/scholar?q=info:ZsVFIcVLSBEJ:scholar.google.com/&output=instlink&hl=en&as_sdt=0,5&scillfp=9606237125919458522&oi=lle		http://scholar.google.co.uk/scholar?hl=en&q=%22Increased+temperature+sensitivity+of+net+DOC+production+from+ombrotrophic+peat+due+to+water+table+draw‐down%22&btnG=&as_sdt=1%2C5&as_sdtp=
353	http://127.0.0.1:8000/scholar_036.html	35	Carbon storage and distribution in tundra soils of Arctic Alaska, USA	http://www.jstor.org/stable/1551852	GJ Michaelson, CL Ping, JM Kimble	Arctic and Alpine Research	1996	JSTOR	Black	... 1993) indicate that tundra ecosystems are changing from a sink to a source of atmospheric carbon dioxide. ... in relation to carbon store distribution can be a controlling factor in methane flux to ... up to 110 kg C m-2 are reported for iso- lated tundra sites where peat has accumulated ...	159			http://scholar.google.co.uk/scholar?hl=en&q=%22Carbon+storage+and+distribution+in+tundra+soils+of+Arctic+Alaska,+USA%22&btnG=&as_sdt=1%2C5&as_sdtp=
354	http://127.0.0.1:8000/scholar_036.html	35	Kinetics of peat soil dissolved organic carbon release from bed sediment to water. Part 1. Laboratory simulation	http://www.sciencedirect.com/science/article/pii/S0045653504009658	L Aguilar, LJ Thibodeaux	Chemosphere	2005	Elsevier	Black	Temporary water reservoirs built upon peat soil may exhibit water quality impairment from elevated dissolved organic carbon (DOC). Microbiological decay of the organic carbon in the bed with subsequent release produces “tea” colored water which may require ...	26	ftp://136.200.241.91/mailout/West%20Delta%20Research%20Documents/aguiar_thibodo%202005.pdf		http://scholar.google.co.uk/scholar?hl=en&q=%22Kinetics+of+peat+soil+dissolved+organic+carbon+release+from+bed+sediment+to+water.+Part+1.+Laboratory+simulation%22&btnG=&as_sdt=1%2C5&as_sdtp=
355	http://127.0.0.1:8000/scholar_036.html	35	Methods for determining emission factors for the use of peat and peatlands: flux measurements and modelling	http://cat.inist.fr/?aModele=afficheN&cpsidt=18767557	J Alm , NJ Shurpali , ES Tuittila , T Laurila…	Boreal Environment …	2007		Black	... Résumé / Abstract. The purpose of this paper is to introduce the gas exchange measurement and flux calculation methods commonly used in the projects of the programme "Greenhouse gas emissions from the use of peat and peatlands in Finland". ... Carbon dioxide. ; ...	54			http://scholar.google.co.uk/scholar?hl=en&q=%22Methods+for+determining+emission+factors+for+the+use+of+peat+and+peatlands:+flux+measurements+and+modelling%22&btnG=&as_sdt=1%2C5&as_sdtp=
356	http://127.0.0.1:8000/scholar_036.html	35	Connecting organic carbon in stream water and soils in a peatland catchment	http://onlinelibrary.wiley.com/doi/10.1029/2005JG000065/full	MF Billett, CM Deacon, SM Palmer…	Journal of …	2006	Wiley Online Library	Black	... Subcatchment analysis of the soil carbon pool and DOC export showed that the strong relationship between percent of peat coverage and stream water DOC in the upper part of the catchment did not hold farther downstream, where freely draining mineral soils become spatially ...	66	http://onlinelibrary.wiley.com/doi/10.1029/2005JG000065/full	[HTML]	http://scholar.google.co.uk/scholar?hl=en&q=%22Connecting+organic+carbon+in+stream+water+and+soils+in+a+peatland+catchment%22&btnG=&as_sdt=1%2C5&as_sdtp=
357	http://127.0.0.1:8000/scholar_036.html	35	Single-and multi-component adsorption of cadmium and zinc using activated carbon derived from bagasse—an agricultural waste	http://www.sciencedirect.com/science/article/pii/S004313540100447X	D Mohan , KP Singh	Water research	2002	Elsevier	Black	... Cover image Cover image. Single- and multi-component adsorption of cadmium and zinc using activated carbon derived from bagasse—an agricultural waste ☆. ... Adsorption data on derived carbon follows both the Freundlich and Langmuir models. ...	642			http://scholar.google.co.uk/scholar?hl=en&q=%22Single-and+multi-component+adsorption+of+cadmium+and+zinc+using+activated+carbon+derived+from+bagasse—an+agricultural+waste%22&btnG=&as_sdt=1%2C5&as_sdtp=
358	http://127.0.0.1:8000/scholar_036.html	35	Water-table changes and nutritional status affect trace gas emissions from laboratory columns of peatland soils	http://www.sciencedirect.com/science/article/pii/S0038071797000746	R Aerts , F Ludwig	Soil Biology and Biochemistry	1997	Elsevier	Black	... tip, was permanently installed at a depth of about 5 cm below the peat surface. ... Carbon dioxide, methane and nitrous oxide emissions were determined at weekly intervals during a period of 7 wk ... 6-ml gas samples were taken from the jars and analysed for CO2, CH4 and N20 on ...	107	http://www.falw.vu.nl/en/Images/Aerts1997e_tcm24-94771.pdf		http://scholar.google.co.uk/scholar?hl=en&q=%22Water-table+changes+and+nutritional+status+affect+trace+gas+emissions+from+laboratory+columns+of+peatland+soils%22&btnG=&as_sdt=1%2C5&as_sdtp=
359	http://127.0.0.1:8000/scholar_036.html	35	Removal of hexavalent chromium using sphagnum moss peat	http://www.sciencedirect.com/science/article/pii/0043135493900127	DC Sharma, CF Forster	Water Research	1993	Elsevier	Black	... The removal of chromium (VI) from dilute aqueous solution by activated carbon. Wat. Res., 11 (1977), pp. 673–679. ... McLellan and Rock, 1988; JK McLellan, CA Rock; Pretreating landfill leachate with peat to remove metals. Wat. Air and Soil Pollut., 37 (1988), pp. 203–215. ...	361			http://scholar.google.co.uk/scholar?hl=en&q=%22Removal+of+hexavalent+chromium+using+sphagnum+moss+peat%22&btnG=&as_sdt=1%2C5&as_sdtp=
360	http://127.0.0.1:8000/scholar_036.html	35	Evolution of stable carbon isotope compositions for methane and carbon dioxide in freshwater wetlands and other anaerobic environments	http://www.sciencedirect.com/science/article/pii/S001670379900321X	ERC Hornibrook , FJ Longstaffe, WS Fyfe	Geochimica et Cosmochimica …	2000	Elsevier	Black	... The Sifton Bog (43°00′00″N) is located within the City of London, Ontario. It is an acidic Sphagnum peat bog (pH ∼ 3.8) and covers an area of ∼28 hectares. ... 3.2. Methane and carbon dioxide. 3.2.1. Dissolved gas. ... Depth (cm), δ 13 C CH4 (‰), δ 13 C ΣCO2 (‰), α C. ...	87			http://scholar.google.co.uk/scholar?hl=en&q=%22Evolution+of+stable+carbon+isotope+compositions+for+methane+and+carbon+dioxide+in+freshwater+wetlands+and+other+anaerobic+environments%22&btnG=&as_sdt=1%2C5&as_sdtp=
361	http://127.0.0.1:8000/scholar_035.html	36	Isotopic–geochemical study of nitrogen and carbon in peat from the Tunguska Cosmic Body explosion site	http://www.sciencedirect.com/science/article/pii/S0019103502000246	EM Kolesnikov, G Longo, T Boettger, NV Kolesnikova…	Icarus	2003	Elsevier	Black	Isotopic–geochemical investigations were carried out on peat samples from the 1908 Tunguska Cosmic Body (TCB) explosion area. We analyzed two peat columns from the Northern peat bog, sampled in 1998, and from the Raketka peat bog, sampled during the ...	16	http://www.researchgate.net/publication/236135145_Isotopic-geochemical_study_of_nitrogen_and_carbon_in_peat_from_the_Tunguska_Cosmic_Body_explosion_site/file/5046352b34f682ed67.pdf		http://scholar.google.co.uk/scholar?hl=en&q=%22Isotopic–geochemical+study+of+nitrogen+and+carbon+in+peat+from+the+Tunguska+Cosmic+Body+explosion+site%22&btnG=&as_sdt=1%2C5&as_sdtp=
362	http://127.0.0.1:8000/scholar_035.html	36	Methane production in tundra peat		BH Svensson	… and Utilization of Gases (H2,E Goltze KG	1976		Book chapter		29		[CITATION]	http://scholar.google.co.uk/scholar?hl=en&q=%22Methane+production+in+tundra+peat%22&btnG=&as_sdt=1%2C5&as_sdtp=
363	http://127.0.0.1:8000/scholar_035.html	36	Elevated atmospheric CO2 effects on belowground processes in C3 and C4 estuarine marsh communities	http://www.jstor.org/stable/1937608	PS Curtis, LM Balduman, BG Drake, DF Whigham	Ecology	1990	JSTOR	Black	... by measuring growth into peat cores previously excavated and refilled with sphag- num peat devoid of ... There was no effect of elevated CO2 on root growth or nitrogen content in the ... Key words: carbon dioxide; global climate change; nitrogen; roots; Scirpus; Spartina; wetlands. ...	154			http://scholar.google.co.uk/scholar?hl=en&q=%22Elevated+atmospheric+CO2+effects+on+belowground+processes+in+C3+and+C4+estuarine+marsh+communities%22&btnG=&as_sdt=1%2C5&as_sdtp=
364	http://127.0.0.1:8000/scholar_035.html	36	Effects of pore structure and temperature on VOC adsorption on activated carbon	http://www.sciencedirect.com/science/article/pii/S0008622300001615	YC Chiang, PC Chiang, CP Huang	Carbon	2001	Elsevier	Black	... The adsorption of VOCs showed that only C 6 H 6 exhibited the activated entry effect. The VOC adsorption capacity of peat-derived carbon was less dependent on temperature. A characteristic curve was observed for the peat-derived carbon. ...	161	http://ntur.lib.ntu.edu.tw/bitstream/246246/96682/1/16.pdf		http://scholar.google.co.uk/scholar?hl=en&q=%22Effects+of+pore+structure+and+temperature+on+VOC+adsorption+on+activated+carbon%22&btnG=&as_sdt=1%2C5&as_sdtp=
365	http://127.0.0.1:8000/scholar_035.html	36	Time saving in〈 sup〉 13〈/sup〉 C spin-lattice relaxation measurements by inversion-recovery	http://www.sciencedirect.com/science/article/pii/0022236475902383	D Canet, GC Levy, IR Peat	Journal of Magnetic Resonance (1969)	1975	Elsevier	Black	... Carbon IRFFT” FTRFTd ... for their encouragements and to R. RosanskeandB.Diterfor technicalassistance.FinancialsupportofCNRS(toD.C.)andtheNational Science Foundation and the US Environmental Protection Agency (to GCL) is gratefully acknow- ledged; IR Peat is the ...	315			http://scholar.google.co.uk/scholar?hl=en&q=%22Time+saving+in〈+sup〉+13〈/sup〉+C+spin-lattice+relaxation+measurements+by+inversion-recovery%22&btnG=&as_sdt=1%2C5&as_sdtp=
366	http://127.0.0.1:8000/scholar_035.html	36	Review and assessment of methane emissions from wetlands	http://www.sciencedirect.com/science/article/pii/0045653593904277	KB Bartlett, RC Harriss	Chemosphere	1993	Elsevier	Black	... Productivity of (Bog-moss) and peat accumulation. Hidrobiologia, 12 (1971), pp. ... Effects of deforestation on sources and sinks of atmospheric carbon dioxide, nitrous oxide, and methane from Central Amazonian soils and biota during the dry season: A preliminary study. ...	672			http://scholar.google.co.uk/scholar?hl=en&q=%22Review+and+assessment+of+methane+emissions+from+wetlands%22&btnG=&as_sdt=1%2C5&as_sdtp=
367	http://127.0.0.1:8000/scholar_035.html	36	Tropical peatlands: carbon stores, carbon gas emissions and contribution to climate change processes	http://edepot.wur.nl/117602#page=159	JO Rieley, RAJ Wüst, J Jauhiainen, SE Page …	… . International Peat …	2008		Conference	Peatlands worldwide play a vital role in biosphere biogeochemical processes (Immirzi et al., 1992). The majority of the world's peatlands by area occur in boreal and temperate zones where they have formed in low-relief (poorly draining) environments under high ...	53	http://edepot.wur.nl/117602#page=159	[PDF]	http://scholar.google.co.uk/scholar?hl=en&q=%22Tropical+peatlands:+carbon+stores,+carbon+gas+emissions+and+contribution+to+climate+change+processes%22&btnG=&as_sdt=1%2C5&as_sdtp=
368	http://127.0.0.1:8000/scholar_035.html	36	Isolation of a novel acidiphilic methanogen from an acidic peat bog	http://www.nature.com/nature/journal/v442/n7099/abs/nature04810.html	SL Bräuer , H Cadillo-Quiroz , E Yashiro, JB Yavitt …	Nature	2006	nature.com	Black	... methanogens include members of an uncultured family-level clade in the Methanomicrobiales prevalent in many acidic peat bogs in ... third of the carbon found in soils worldwide 8 . They are important sources of atmospheric methane, a greenhouse gas whose concentration ...	91	http://www.nature.com/nature/journal/v442/n7099/full/nature04810.html		http://scholar.google.co.uk/scholar?hl=en&q=%22Isolation+of+a+novel+acidiphilic+methanogen+from+an+acidic+peat+bog%22&btnG=&as_sdt=1%2C5&as_sdtp=
369	http://127.0.0.1:8000/scholar_035.html	36	Carbon pools and flux of global forest ecosystems	http://www.sciencemag.org/content/263/5144/185.short	RK Dixon, AM Solomon, S Brown, RA Houghton…	Science	1994	sciencemag.org	Black	... of the carbon in forest ecosystems is contained in soils and associated peat deposits ... Model projections and some results suggest that forests could be carbon sinks or sources in ... The emission of the greenhouse gas CO2 to the atmosphere by fossil fuel combustion and land-use ...	2804	http://academic.engr.arizona.edu/HWR/Brooks/GC572-2004/readings/dixon.pdf		http://scholar.google.co.uk/scholar?hl=en&q=%22Carbon+pools+and+flux+of+global+forest+ecosystems%22&btnG=&as_sdt=1%2C5&as_sdtp=
370	http://127.0.0.1:8000/scholar_035.html	36	Effects of grassland management on the emission of methane from intensively managed grasslands on peat soil	http://link.springer.com/article/10.1023/A:1004219522404	A Van den Pol-van Dasselaar, ML Van Beusichem…	Plant and Soil	1997	Springer	Black	Abstract Methane (CH4) is the most important greenhouse gas next to CO2 and as such it contributes to the enhanced greenhouse effect. Peat soils are often considered as sources of CH4. Grasslands on the other hand are generally considered to be a net sink for ...	24	http://library.wur.nl/WebQuery/edepot/201574#page=74		http://scholar.google.co.uk/scholar?hl=en&q=%22Effects+of+grassland+management+on+the+emission+of+methane+from+intensively+managed+grasslands+on+peat+soil%22&btnG=&as_sdt=1%2C5&as_sdtp=
371	http://127.0.0.1:8000/scholar_034.html	37	Methane efflux from emergent vegetation in peatlands	http://www.jstor.org/stable/2261359	RD Shannon, JR White, JE Lawson, BS Gilmour	Journal of Ecology	1996	JSTOR	Black	... Similarly, maximum methane effluxes were observed in the late afternoon or early evening (18.00-22.00 hours), peaking several hours after maximum peat temperatures (17.00 hours). Discussion ... Page 6. 244 Methane efflux from peatlands ... Site CH4 CO2 N2 02 ...	146			http://scholar.google.co.uk/scholar?hl=en&q=%22Methane+efflux+from+emergent+vegetation+in+peatlands%22&btnG=&as_sdt=1%2C5&as_sdtp=
372	http://127.0.0.1:8000/scholar_034.html	37	Dissolved organic carbon dynamics in the peat –streamwater interface	http://link.springer.com/article/10.1023/B:BIOG.0000049338.81809.7c	G Bengtsson, N Törneman	Biogeochemistry	2004	Springer	Black	Abstract A series of experiments were conducted to address the fate of dissolved organic carbon (DOC) in the peat–stream interface zone linking a minerotrophic poor fen and an ombrotrophic mire with surrounding stream water in the drainage area of Lake Örträsket in ...	14	http://127.0.0.1:8000/scholar?q=info:V0L-hJcPzXgJ:scholar.google.com/&output=instlink&hl=en&as_sdt=0,5&scillfp=16094760055931554124&oi=lle		http://scholar.google.co.uk/scholar?hl=en&q=%22Dissolved+organic+carbon+dynamics+in+the+peat+–streamwater+interface%22&btnG=&as_sdt=1%2C5&as_sdtp=
373	http://127.0.0.1:8000/scholar_034.html	37	Influence of vascular plant photosynthetic rate on CH4 emission from peat monoliths from southern boreal Sweden	http://onlinelibrary.wiley.com/doi/10.1111/j.1751-8369.1999.tb00296.x/abstract	A Joabsson, TR Christensen , B Wallén	Polar Research	1999	Wiley Online Library	Black	The contribution of CH4 from wetlands to the atmosphere, on a global scale, is about 110 Tg per year (Matthews & Fung 1987; Fung et al. 1991; Bartlett & Harriss 1993); 10-20% originates irom northern (> 50” N). non-forested wetlands and tundra (Matthews & Fung ...	24	http://www.polarresearch.net/index.php/polar/article/download/6577/7410		http://scholar.google.co.uk/scholar?hl=en&q=%22Influence+of+vascular+plant+photosynthetic+rate+on+CH4+emission+from+peat+monoliths+from+southern+boreal+Sweden%22&btnG=&as_sdt=1%2C5&as_sdtp=
374	http://127.0.0.1:8000/scholar_034.html	37	Changes in carbon fractions during composting and maturation of organic wastes	http://link.springer.com/article/10.1007/BF02393889	C Garcia , T Hernandez, F Costa	Environmental Management	1991	Springer	Black	... The samples with peat residue showed the lowest decreases in carbon fractions ... which the microorganisms transform the more easily biodegrad- able organic matter into CO2, H20, and ... or- ganic matter, and during this period the greatest changes in organic carbon fractions take ...	92			http://scholar.google.co.uk/scholar?hl=en&q=%22Changes+in+carbon+fractions+during+composting+and+maturation+of+organic+wastes%22&btnG=&as_sdt=1%2C5&as_sdtp=
375	http://127.0.0.1:8000/scholar_034.html	37	Fluxes of nitrous oxide and methane on an abandoned peat extraction site: effect of reed canary grass cultivation	http://www.sciencedirect.com/science/article/pii/S0960852409004568	NP Hyvönen, JT Huttunen, NJ Shurpali , NM Tavi…	Bioresource …	2009	Elsevier	Black	Drained organic soils are among the most risky soil types as far as their greenhouse gas emissions are considered. Reed canary grass (RCG) is a potential bioenergy crop in the boreal region, but the atmospheric impact of its cultivation is unknown. The fluxes of N2O ...	27	http://www.researchgate.net/publication/26239399_Fluxes_of_nitrous_oxide_and_methane_on_an_abandoned_peat_extraction_site_effect_of_reed_canary_grass_cultivation/file/3deec525fcc2539791.pdf		http://scholar.google.co.uk/scholar?hl=en&q=%22Fluxes+of+nitrous+oxide+and+methane+on+an+abandoned+peat+extraction+site:+effect+of+reed+canary+grass+cultivation%22&btnG=&as_sdt=1%2C5&as_sdtp=
376	http://127.0.0.1:8000/scholar_034.html	37	The contribution of plant roots to CO2 fluxes from organic soils	http://link.springer.com/article/10.1007/BF00336052	J Silvola, J Alm , U Ahlholm, H Nykaenen…	Biology and fertility of …	1996	Springer	Black	... Int Peat Con- gress, Uppsala, Sweden, June 22-26, 1992, vol 2, International Peat Society, Jyski ... Publ Acad Finland 1/94, Helsinki, pp 279-284 Moore TR (1986) Carbon dioxide evolution from subarctic ... K, Silvola J, Martikainen PJ (1995) Emis- sions of CH4, N20 and CO2 from a ...	114			http://scholar.google.co.uk/scholar?hl=en&q=%22The+contribution+of+plant+roots+to+CO2+fluxes+from+organic+soils%22&btnG=&as_sdt=1%2C5&as_sdtp=
377	http://127.0.0.1:8000/scholar_034.html	37	Phase distribution of 14C-labeled multiwalled carbon nanotubes in aqueous systems containing model solids: Peat	http://pubs.acs.org/doi/full/10.1021/es1026097	L Zhang , EJ Petersen , Q Huang	Environmental science & …	2011	ACS Publications	Black	Understanding the phase distribution of nanoparticles between soils or sediments and water is a critical factor in determining their fate in environmental systems. As such, we examined the interactions of 14 C-labeled multiwalled carbon nanotubes (MWNTs) in aqueous systems ...	30			http://scholar.google.co.uk/scholar?hl=en&q=%22Phase+distribution+of+14C-labeled+multiwalled+carbon+nanotubes+in+aqueous+systems+containing+model+solids:+Peat%22&btnG=&as_sdt=1%2C5&as_sdtp=
378	http://127.0.0.1:8000/scholar_034.html	37	Moisture controls on carbon dioxide dynamics of peat ‐Sphagnum monoliths	http://onlinelibrary.wiley.com/doi/10.1002/eco.36/abstract	M Strack, JS Price	Ecohydrology	2009	Wiley Online Library	Black	Abstract Sphagnum moss is the major peat-forming vegetation component in boreal peatlands. The relationship between Sphagnum productivity and moss moisture content has been documented; however, the link between moss moisture content and conditions in the ...	26	http://www.gret-perg.ulaval.ca/uploads/tx_centrerecherche/Strack_Price_Ecohydrol_2009.pdf		http://scholar.google.co.uk/scholar?hl=en&q=%22Moisture+controls+on+carbon+dioxide+dynamics+of+peat+‐Sphagnum+monoliths%22&btnG=&as_sdt=1%2C5&as_sdtp=
379	http://127.0.0.1:8000/scholar_034.html	37	Methane emissions in two drained peat agro-ecosystems with high and low agricultural intensity	http://link.springer.com/article/10.1007/s11104-009-0180-1	AP Schrier-Uijl, PS Kroon, PA Leffelaar…	Plant and soil	2010	Springer	Black	Abstract Methane (CH 4) emissions were compared for an intensively and extensively managed agricultural area on peat soils in the Netherlands to evaluate the effect of reduced management on the CH 4 balance. Chamber measurements (photoacoustic methods) for ...	27	http://link.springer.com/article/10.1007/s11104-009-0180-1/fulltext.html		http://scholar.google.co.uk/scholar?hl=en&q=%22Methane+emissions+in+two+drained+peat+agro-ecosystems+with+high+and+low+agricultural+intensity%22&btnG=&as_sdt=1%2C5&as_sdtp=
380	http://127.0.0.1:8000/scholar_034.html	37	Turnover of detrital organic carbon in a nutrient-impacted Everglades marsh	https://dl.sciencesocieties.org/publications/sssaj/abstracts/62/5/SS0620051460	WF DeBusk, KR Reddy	Soil Science Society of America …	1998		Black	... Molar quantity of CO2 evolved during the incubation period was stoichiometrically determined (Zibilske, 1994 ... g wet weight) of litter, surface peat (0-10 cm depth) and subsurface peat (10-30 ... stopper for short-term storage of samples, prior to analysis on a GC for methane (CH4). ...	153	http://soils.ifas.ufl.edu/wetlands/publications/PDF-articles/226.Turnover%20of%20detrital%20carbon.pdf		http://scholar.google.co.uk/scholar?hl=en&q=%22Turnover+of+detrital+organic+carbon+in+a+nutrient-impacted+Everglades+marsh%22&btnG=&as_sdt=1%2C5&as_sdtp=
381	http://127.0.0.1:8000/scholar_033.html	38	Effects of elevated CO〈 sub〉 2〈/sub〉 on fen peat biogeochemistry	http://www.sciencedirect.com/science/article/pii/S0048969701007240	H Kang , C Freeman , TW Ashendon	Science of the Total Environment	2001	Elsevier	Black	... Table 1. Effects of elevated CO 2 on trace gas emission, carbon, enzymes and biomass in the northern peat cores *. Elevated CO 2, Ambient CO 2. ... Stimulation of methane emission by carbon dioxide enrichment of marsh vegetation. Nature, 370 (1994), pp. 47–49. ...	67			http://scholar.google.co.uk/scholar?hl=en&q=%22Effects+of+elevated+CO〈+sub〉+2〈/sub〉+on+fen+peat+biogeochemistry%22&btnG=&as_sdt=1%2C5&as_sdtp=
382	http://127.0.0.1:8000/scholar_033.html	38	Deforestation, forest degradation, biodiversity loss and CO2 emissions in Riau, Sumatra, Indonesia	http://assets.panda.org/downloads/authors_and_methodology_of_riau_co2_report__25feb08_.doc	WWF Indonesia	… Province's Forest and Peat Soil Carbon loss …	2008		Grey	WWF Indonesia began work in Riau, Sumatra in 1999 and employs around 30 staff in several offices in the province. WWF has been collecting land use and biodiversity data since 2000 and analyzed them for this report. WWF's large, experienced ground staff and ...	46	http://assets.panda.org/downloads/authors_and_methodology_of_riau_co2_report__25feb08_.doc	[DOC]	http://scholar.google.co.uk/scholar?hl=en&q=%22Deforestation,+forest+degradation,+biodiversity+loss+and+CO2+emissions+in+Riau,+Sumatra,+Indonesia%22&btnG=&as_sdt=1%2C5&as_sdtp=
383	http://127.0.0.1:8000/scholar_033.html	38	Predicting the future carbon budget of an upland peat catchment	http://link.springer.com/article/10.1007/s10584-007-9300-1	F Worrall, T Burt, J Adamson, M Reed , J Warburton…	Climatic Change	2007	Springer	Black	Abstract Using data from a single upland peat catchment (North Pennines, UK), this study combines descriptions of the uptake of carbon by primary productivity and input from both wet and dry deposition with descriptions of carbon release pathways: soil CO 2 respiration ...	27			http://scholar.google.co.uk/scholar?hl=en&q=%22Predicting+the+future+carbon+budget+of+an+upland+peat+catchment%22&btnG=&as_sdt=1%2C5&as_sdtp=
384	http://127.0.0.1:8000/scholar_033.html	38	Air-pollution effect and paleotemperature scale versus δ13C records in tree rings and in a peat core (Southern Poland)	http://link.springer.com/article/10.1023/A:1023640903795	MO Jędrysek, M Krąpiec, G Skrzypek …	Water	2003	Springer	Black	... In general, the carbon isotope fractionation between atmospheric CO2 and assimilates is the combined ... From Figure 1, it is clear that in general the peat and tree ring ... natural conditions, carbon isotope fractionation between living plants and atmospheric carbon dioxide ( 13Cp−a ...	25			http://scholar.google.co.uk/scholar?hl=en&q=%22Air-pollution+effect+and+paleotemperature+scale+versus+δ13C+records+in+tree+rings+and+in+a+peat+core+(Southern+Poland)%22&btnG=&as_sdt=1%2C5&as_sdtp=
385	http://127.0.0.1:8000/scholar_033.html	38	Effects of experimental drying intensity and duration on respiration and methane production recovery in fen peat incubations	http://www.sciencedirect.com/science/article/pii/S0038071711004329	C Estop-Aragonés, C Blodau	Soil Biology and Biochemistry	2012	Elsevier	Black	Drying and rewetting to a variable extent influence the C gas exchange between peat soils and the atmosphere. We incubated a decomposed and compacted fen peat and investigated in two experiments 1) the vertical distribution of CO2 and CH4 production ...	19	http://www.uni-muenster.de/imperia/md/content/landschaftsoekologie/hydrologiebodenkunde/profblodauliteratur/_61__estop_aragones___blodau_2012.pdf		http://scholar.google.co.uk/scholar?hl=en&q=%22Effects+of+experimental+drying+intensity+and+duration+on+respiration+and+methane+production+recovery+in+fen+peat+incubations%22&btnG=&as_sdt=1%2C5&as_sdtp=
386	http://127.0.0.1:8000/scholar_033.html	38	Distribution and cultivation intensity of agricultural peat and gyttja soils in Sweden and estimation of greenhouse gas emissions from cultivated peat soils	http://www.sciencedirect.com/science/article/pii/S0016706108003352	Ö Berglund, K Berglund	Geoderma	2010	Elsevier	Black	Digitised maps of Quaternary deposits, 40K radiation data and Integrated Agricultural Control System databases (IACS) were used in a GIS analysis to estimate the distribution and land use of agricultural peat and gyttja soils in Sweden. The total area of agricultural ...	25			http://scholar.google.co.uk/scholar?hl=en&q=%22Distribution+and+cultivation+intensity+of+agricultural+peat+and+gyttja+soils+in+Sweden+and+estimation+of+greenhouse+gas+emissions+from+cultivated+peat+soils%22&btnG=&as_sdt=1%2C5&as_sdtp=
387	http://127.0.0.1:8000/scholar_033.html	38	Greenhouse carbon balance of wetlands: methane emission versus carbon sequestration	http://onlinelibrary.wiley.com/doi/10.1034/j.1600-0889.2001.530501.x/abstract	GJ Whiting, JP Chanton	Tellus B	2001	Wiley Online Library	Black	... peat. The balance of CH 4 and CO 2 exchange can provide an index of a wetland's greenhouse gas (carbon) contribution to the atmosphere. Here, we relate the atmospheric global warming potential of methane (GWP M ) with annual methane emission/carbon dioxide ...	195	http://onlinelibrary.wiley.com/doi/10.1034/j.1600-0889.2001.530501.x/pdf		http://scholar.google.co.uk/scholar?hl=en&q=%22Greenhouse+carbon+balance+of+wetlands:+methane+emission+versus+carbon+sequestration%22&btnG=&as_sdt=1%2C5&as_sdtp=
388	http://127.0.0.1:8000/scholar_033.html	38	Methane and carbon dioxide production in, transport through, and efflux from a peatland [and discussion]	http://rsta.royalsocietypublishing.org/content/351/1696/249.short	RS Clymo , DME Pearce…	… of the Royal …	1995		Black	... Downloaded from rsta.royalsocietypublishing.org on December 20, 2010 Methane and carbon dioxide production in, transport through, and efflux from a peatland By RS Clymo and DME Pearce School of Biological ... The concentrations of CH4 and CO2 in the peat below 50 ...	94	http://webspace.qmul.ac.uk/clymo/Clymo-article-PDFs/52-Clymo-Pearce-1995-CH4-CO2-transport.pdf		http://scholar.google.co.uk/scholar?hl=en&q=%22Methane+and+carbon+dioxide+production+in,+transport+through,+and+efflux+from+a+peatland+[and+discussion]%22&btnG=&as_sdt=1%2C5&as_sdtp=
389	http://127.0.0.1:8000/scholar_033.html	38	Assessment on peatlands, biodiversity and climate change		F Parish, A Sirin, D Charman , H Joosten, T Minaeva…			Wetlands International	Grey		139		[CITATION]	http://scholar.google.co.uk/scholar?hl=en&q=%22Assessment+on+peatlands,+biodiversity+and+climate+change%22&btnG=&as_sdt=1%2C5&as_sdtp=
390	http://127.0.0.1:8000/scholar_033.html	38	Impacts of agricultural utilization of peat soils on the greenhouse gas balance	http://mbwatercaucus.org/wp-content/uploads/2012/06/PeatlandsandClimateChangeBookIPS2008.pdf#page=72	R Oleszczuk, K Regina, L Szajdak…	… and climate change	2008	mbwatercaucus.org	Book	The area and intensity of agricultural production on peatland have increased in many countries during the last two centuries, and agriculture is now the most widespread human use for peatlands globally. Available data are summarised in Table 3.1. However, it is ...	26	http://mbwatercaucus.org/wp-content/uploads/2012/06/PeatlandsandClimateChangeBookIPS2008.pdf#page=72	[PDF]	http://scholar.google.co.uk/scholar?hl=en&q=%22Impacts+of+agricultural+utilization+of+peat+soils+on+the+greenhouse+gas+balance%22&btnG=&as_sdt=1%2C5&as_sdtp=
391	http://127.0.0.1:8000/scholar_037.html	39	A process‐based model to derive methane emissions from natural wetlands	http://onlinelibrary.wiley.com/doi/10.1029/96GL03577/full	BP Walter, M Heimann , RD Shannon…	Geophysical Research …	1996	Wiley Online Library	Black	... TR Moore, Methane pro- duction and consumption in temperate and subarctic peat soils: Response ... of drought stress and other fac- tors on seasonal land biosphere CO2 exchange studied ... Whiting, GJ and JP Chanton, Plant-dependent CH4 emission in a subarctic Canadian fen ...	119	http://onlinelibrary.wiley.com/doi/10.1029/96GL03577/pdf		http://scholar.google.co.uk/scholar?hl=en&q=%22A+process‐based+model+to+derive+methane+emissions+from+natural+wetlands%22&btnG=&as_sdt=1%2C5&as_sdtp=
392	http://127.0.0.1:8000/scholar_037.html	39	Land cover change and soil organic carbon stocks in the Republic of Ireland 1851–2000	http://link.springer.com/article/10.1007/s10584-008-9412-2	JM Eaton, NM McGoff, KA Byrne, P Leahy, G Kiely	Climatic change	2008	Springer	Black	... land use change is estimated to account for 25% of the anthropogenic flux of carbon dioxide to the ... per unit area (herein Mg ha −1 ). It is used to compare the carbon stocks of ... Despite peat depth being a crucial factor in many aspects of peatland research, Hammond (1981) is the ...	67	http://www.ucc.ie/academic/civil/staff/hydromet/files/Eaton.2008.pdf		http://scholar.google.co.uk/scholar?hl=en&q=%22Land+cover+change+and+soil+organic+carbon+stocks+in+the+Republic+of+Ireland+1851–2000%22&btnG=&as_sdt=1%2C5&as_sdtp=
393	http://127.0.0.1:8000/scholar_037.html	39	Links between methane flux and transcriptional activities of methanogens and methane oxidizers in a blanket peat bog	http://onlinelibrary.wiley.com/doi/10.1111/j.1574-6941.2010.00871.x/full	TE Freitag, S Toet, P Ineson …	FEMS microbiology …	2010	Wiley Online Library	Black	Abstract The relationship between biogeochemical process rates and microbial functional activity was investigated by analysis of the transcriptional dynamics of the key functional genes for methanogenesis (methyl coenzyme M reductase; mcrA) and methane oxidation ...	29	http://onlinelibrary.wiley.com/doi/10.1111/j.1574-6941.2010.00871.x/full	[HTML]	http://scholar.google.co.uk/scholar?hl=en&q=%22Links+between+methane+flux+and+transcriptional+activities+of+methanogens+and+methane+oxidizers+in+a+blanket+peat+bog%22&btnG=&as_sdt=1%2C5&as_sdtp=
394	http://127.0.0.1:8000/scholar_037.html	39	A kinetic and spectrophotometric examination of silver (II) in perchlorate media	http://pubs.acs.org/doi/abs/10.1021/j100802a012	JB Kirwin, FD Peat , PJ Proll…	The Journal of Physical …	1963	ACS Publications	Black	... Page 4. 1620 J. B. KIRKIS, E'. D. PEAT, P. J. PROLL, AXD LH SUTCLIFFE Vol. 67 2.0 4.0 6.0 Inverse Ag(1) ooncn., *Vf-1. Fig. ... Chsm. Soc., 80, 273 (195S)i Page 5. August, 1963 ADSORPTION OF WATER AND CARBON DIOXIDE BY LINDE MOLECULAR SIEVE X 1621 ...	53			http://scholar.google.co.uk/scholar?hl=en&q=%22A+kinetic+and+spectrophotometric+examination+of+silver+(II)+in+perchlorate+media%22&btnG=&as_sdt=1%2C5&as_sdtp=
395	http://127.0.0.1:8000/scholar_037.html	39	Global, regional, and national fossil-fuel CO2 emissions	http://cdiac.ornl.gov/trends/emis/overview_2009.html	TA Boden, G Marland, RJ Andres	Carbon Dioxide Information …	2009		Book chapter	... Carbon Dioxide Information Analysis Center Environmental Sciences Division Oak Ridge National Laboratory Oak Ridge, Tennessee 37831-6290, USA. ... (1991) published a summary compilation that tabulates coal, brown coal, peat, and crude oil production by nation and year. ...	525			http://scholar.google.co.uk/scholar?hl=en&q=%22Global,+regional,+and+national+fossil-fuel+CO2+emissions%22&btnG=&as_sdt=1%2C5&as_sdtp=
396	http://127.0.0.1:8000/scholar_037.html	39	Potential feedbacks of northern wetlands on climate change	http://www.jstor.org/stable/1312419	SD Bridgham, CA Johnston , J Pastor , K Updegraff	BioScience	1995	JSTOR	Black	... (C02) - (CH4) (Methanotrophy ... Figure 3. Cumulative mineralization over 80-week incubations for (a) carbon, (b) methane, (c) the ratio of carbon dioxide to methane production under ... nitrogen at 15?C and 30?C in the surface organic layer in a beaver meadow and in peat from the ...	134			http://scholar.google.co.uk/scholar?hl=en&q=%22Potential+feedbacks+of+northern+wetlands+on+climate+change%22&btnG=&as_sdt=1%2C5&as_sdtp=
397	http://127.0.0.1:8000/scholar_037.html	39	The global carbon dioxide flux in soil respiration and its relationship to vegetation and climate	http://onlinelibrary.wiley.com/doi/10.1034/j.1600-0889.1992.t01-1-00001.x/abstract	JW Raich , WH Schlesinger	Tellus B	1992	Wiley Online Library	Black	... Responses of drained peat-bog forests to a variety of fertilizers were variable, with no change, stimu- lations, and decreases in soil respiration rates being ... CARBON DIOXIDE FLUX, VEGETATION AND CLIMATE 89 (Я (D Lo о X5 1.3 1.7 2.1 2.5 2.9 3.3 Reported Q-|q Value Fig. ...	2667	http://onlinelibrary.wiley.com/doi/10.1034/j.1600-0889.1992.t01-1-00001.x/pdf		http://scholar.google.co.uk/scholar?hl=en&q=%22The+global+carbon+dioxide+flux+in+soil+respiration+and+its+relationship+to+vegetation+and+climate%22&btnG=&as_sdt=1%2C5&as_sdtp=
398	http://127.0.0.1:8000/scholar_037.html	39	Estimates of soil organic carbon stocks in central Canada using three different approaches	http://www.nrcresearchpress.com/doi/abs/10.1139/x01-122	JS Bhatti , MJ Apps, C Tarnocai	Canadian Journal of Forest …	2002	NRC Research Press	Black	... layer and 60 to 181 kg C·m–2 for the total peat soil depth. ... the importance of soil C in ecosystem processes and potential feedbacks on atmospheric CO2 concentration and ... The Carbon Budget Model of the Canadian Forest Sector (CBM-CFS2) shows major differences between ...	56	http://www.researchgate.net/publication/41117113_Estimates_of_Soil_Organic_Carbon_Stocks_in_Central_Canada_Using_Three_Different_Approaches/file/9c9605232152859a40.pdf		http://scholar.google.co.uk/scholar?hl=en&q=%22Estimates+of+soil+organic+carbon+stocks+in+central+Canada+using+three+different+approaches%22&btnG=&as_sdt=1%2C5&as_sdtp=
399	http://127.0.0.1:8000/scholar_037.html	39	Atmospheric methane sources: Alaskan tundra bogs, an alpine fen, and a subarctic boreal marsh	http://onlinelibrary.wiley.com/doi/10.1111/j.1600-0889.1986.tb00083.x/abstract	DI Sebacher, RC Harriss, KB Bartlett, SM Sebacher…	Tellus B	1986	Wiley Online Library	Black	... and tundra wetland ecosystems have stored a signifi- cant amount of the Earth's carbon in organic ... Since peat deposits in water- logged boreal and tundra areas are likely to be under ... a globally significant area, these ecosystems could be an important source of methane to the ...	221	http://onlinelibrary.wiley.com/doi/10.1111/j.1600-0889.1986.tb00083.x/pdf		http://scholar.google.co.uk/scholar?hl=en&q=%22Atmospheric+methane+sources:+Alaskan+tundra+bogs,+an+alpine+fen,+and+a+subarctic+boreal+marsh%22&btnG=&as_sdt=1%2C5&as_sdtp=
400	http://127.0.0.1:8000/scholar_037.html	39	Calculating carbon savings from wind farms on Scottish peat lands-A New Approach	http://scotlandmalawi.com/Resource/Doc/917/0117390.pdf	DR Nayak, D Miller, A Nolan, P Smith …	Prepared for the …	2008	scotlandmalawi.com	Grey	1. Executive Summary Proposals for large scale wind farm developments in Scotland have raised concerns about the reliability of methods used to calculate carbon savings associated with wind farms. Guidance produced by SNH in 2003 in a technical guidance note has ...	22	http://scotlandmalawi.com/Resource/Doc/917/0117390.pdf	[PDF]	http://scholar.google.co.uk/scholar?hl=en&q=%22Calculating+carbon+savings+from+wind+farms+on+Scottish+peat+lands-A+New+Approach%22&btnG=&as_sdt=1%2C5&as_sdtp=
401	http://127.0.0.1:8000/scholar_039.html	40	A high-resolution record of atmospheric CO2 content from carbon isotopes in pet	http://www.nature.com/nature/journal/v367/n6459/abs/367153a0.html	JWC White , P Ciais , RA Figge, R Kenny, V Markgraf			nature.com	Black	... OUR understanding of how future changes in atmospheric carbon-dioxide concentrations will affect the global climate system arises in part from comparing past ... for reconstructing atmospheric CO 2 concentration using the 13 C/ 12 C ratio (δ 13 C) in mosses and sedges in peat. ...	148			http://scholar.google.co.uk/scholar?hl=en&q=%22A+high-resolution+record+of+atmospheric+CO2+content+from+carbon+isotopes+in+pet%22&btnG=&as_sdt=1%2C5&as_sdtp=
402	http://127.0.0.1:8000/scholar_039.html	40	EU peatlands: Current carbon stocks and trace gas fluxes	https://www.bgc-jena.mpg.de/bgp/uploads/Teaching/Peatreport_final.pdf	KA Byrne, B Chojnicki, TR Christensen …	… Greenhouse Gas …	2004		Grey	... The report will conclude with an attempt at providing the best estimate of a full greenhouse gas budget for European ... is an uptake of CO2 and a corresponding emis- sion of CH4, especially during periods of peat accumulation. ... 5. Current annual rates of GHG exchanges in ...	70	https://www.bgc-jena.mpg.de/bgp/uploads/Teaching/Peatreport_final.pdf	[PDF]	http://scholar.google.co.uk/scholar?hl=en&q=%22EU+peatlands:+Current+carbon+stocks+and+trace+gas+fluxes%22&btnG=&as_sdt=1%2C5&as_sdtp=
403	http://127.0.0.1:8000/scholar_039.html	40	Seasonal variation in CH4 emissions and production and oxidation potentials at microsites on an oligotrophic pine fen	http://link.springer.com/article/10.1007/s004420050176	S Saarnio, J Alm , J Silvola, A Lohila, H Nykänen…	Oecologia	1997	Springer	Black	... decay slowly, mostly anaerobically, under waterlogged conditions, producing methane (CH4) as well as carbon dioxide (CO2). ... Spatial variation in CH4 emis- sion rates is also high between the mire types ... 1993a, b). The net meth- ane flux between the peat surface and the ...	150			http://scholar.google.co.uk/scholar?hl=en&q=%22Seasonal+variation+in+CH4+emissions+and+production+and+oxidation+potentials+at+microsites+on+an+oligotrophic+pine+fen%22&btnG=&as_sdt=1%2C5&as_sdtp=
404	http://127.0.0.1:8000/scholar_039.html	40	Relationships between photosynthesis and light intensity in the tomato	http://aob.oxfordjournals.org/content/34/2/319.short	WE Peat	Annals of Botany	1970	Annals Botany Co	Black	... Rates of apparent photosynthesis were estimated as the rates of carbon dioxide assimilation by the gas-analysis ... be passed through the gas-analyser in turn, thereby permitting rapid sequential estimates of CO2 uptake to ... Peat—Photosynthesis and Light Intensity in the Tomato ...	60			http://scholar.google.co.uk/scholar?hl=en&q=%22Relationships+between+photosynthesis+and+light+intensity+in+the+tomato%22&btnG=&as_sdt=1%2C5&as_sdtp=
405	http://127.0.0.1:8000/scholar_039.html	40	Sources and sinks of dissolved organic carbon in a forested swamp catchment	http://link.springer.com/article/10.1007/BF00002806	M Dalva, TR Moore	Biogeochemistry	1991	Springer	Black	... Abstract. Concentrations of dissolved organic carbon (DOC) were measured in precipita- tion, throughfall, stemflow, and soil, peat and stream water in a 50 ha catchment with a central 5 ha swamp at Mont St. Hilaire, Quebec. ...	167			http://scholar.google.co.uk/scholar?hl=en&q=%22Sources+and+sinks+of+dissolved+organic+carbon+in+a+forested+swamp+catchment%22&btnG=&as_sdt=1%2C5&as_sdtp=
406	http://127.0.0.1:8000/scholar_039.html	40	Soil hydrology and CO2 release of peat soils	http://boku.forst.tu-dresden.de/pdf/02_Wessolek.pdf	G Wessolek, K Schwarzel , M Renger…	Journal of Plant …	2002		Black	Summary±Zusammenfassung A simple model to predict soil water components and the CO2 release for peat soils is presented. It can be used to determine plant water uptake and the CO2 release as a result of peat mineralization for different types of peat soils, various ...	24	http://boku.forst.tu-dresden.de/pdf/02_Wessolek.pdf	[PDF]	http://scholar.google.co.uk/scholar?hl=en&q=%22Soil+hydrology+and+CO2+release+of+peat+soils%22&btnG=&as_sdt=1%2C5&as_sdtp=
407	http://127.0.0.1:8000/scholar_039.html	40	Distribution and storage of soil organic carbon in China	http://onlinelibrary.wiley.com/doi/10.1029/2001GB001844/full	H Wu, Z Guo, C Peng	Global biogeochemical cycles	2003	Wiley Online Library	Black	... 1.00 to 5.00 C/m 2 for the organic horizons, 2.50 to 7.50 C/m 2 for the mineral horizons and 4.00 to 11.00 kg C/m 2 for soil profiles at the subgroup level (Figure 2). Lowest carbon density was observed for the takyr soil group, with the highest occurring in the peat soils (Table 1). ...	99	http://onlinelibrary.wiley.com/doi/10.1029/2001GB001844/full	[HTML]	http://scholar.google.co.uk/scholar?hl=en&q=%22Distribution+and+storage+of+soil+organic+carbon+in+China%22&btnG=&as_sdt=1%2C5&as_sdtp=
408	http://127.0.0.1:8000/scholar_039.html	40	Carbon isotopic compositions of prokaryotic lipids as tracers of carbon cycling in diverse settings	http://www.sciencedirect.com/science/article/pii/S000925410200387X	RD Pancost , JS Sinninghe Damsté	Chemical Geology	2003	Elsevier	Black	... Bacteria; Archaea; Carbon isotopes; Peat; Cold seeps; Biomarkers; Hopanoids; Fatty acids; Ether lipids. ... Carbon dioxide and methane are two of the most significant greenhouse gases, and ... of carbon, and the potential for future changes in greenhouse gas concentrations as a ...	125			http://scholar.google.co.uk/scholar?hl=en&q=%22Carbon+isotopic+compositions+of+prokaryotic+lipids+as+tracers+of+carbon+cycling+in+diverse+settings%22&btnG=&as_sdt=1%2C5&as_sdtp=
409	http://127.0.0.1:8000/scholar_039.html	40	Sphagnum peatland development at their southern climatic range in West Siberia: trends and peat accumulation patterns	http://iopscience.iop.org/1748-9326/2/4/045014	A Peregon, M Uchida, Y Shibata	Environmental Research …	2007		Black	... nitrogen ratios as a measure of peat decomposition Ecology 77 271–5 CrossRef Mäkilä M 1997 Holocene lateral expansion, peat growth and ... SJ, Vourlitis G, Jenkins M, Richers G and Grunke N 1993 Recent change of Arctic tundra ecosystems from a net carbon dioxide sink to ...	5			http://scholar.google.co.uk/scholar?hl=en&q=%22Sphagnum+peatland+development+at+their+southern+climatic+range+in+West+Siberia:+trends+and+peat+accumulation+patterns%22&btnG=&as_sdt=1%2C5&as_sdtp=
410	http://127.0.0.1:8000/scholar_039.html	40	Closing the global N2O budget: nitrous oxide emissions through the agricultural nitrogen cycle	http://link.springer.com/article/10.1023/A:1009740530221	A Mosier , C Kroeze , C Nevison, O Oenema…	Nutrient cycling in …	1998	Springer	Black	... R & Beese F (1992) Effects of liming and nitrogen fertilization on emission of CO2 and N2O ... OECD/OCDE, Paris; Jarvis SC & Pain BF (1994) Greenhouse gas emissions from intensive livestock ... O & van Beusichem ML (1997) Nitrogen loss from grassland on peat soils through ...	919	http://www.researchgate.net/publication/251230049_Closing_the_global_N_2_O_budget_nitrous_oxide_emissions_through_the_agricultural_nitrogen_cycle/file/3deec523b297f63a55.pdf		http://scholar.google.co.uk/scholar?hl=en&q=%22Closing+the+global+N2O+budget:+nitrous+oxide+emissions+through+the+agricultural+nitrogen+cycle%22&btnG=&as_sdt=1%2C5&as_sdtp=
411	http://127.0.0.1:8000/scholar_040.html	41	Composting and compost utilization: accounting of greenhouse gases and global warming contributions	http://wmr.sagepub.com/content/early/2009/09/11/0734242X09345275.short	A Boldrin , JK Andersen, J Møller…	Waste Management …	2009		Black	... Greenhouse gas (GHG) emissions related to composting of organic waste and the use of compost were assessed ... tonne–1 peat Section entitled: Indirect downstream emissions ... GHG emissions from fuel combustion can be calculated using emission factors reported in Table 2 ...	96	http://documents.er.dtu.dk/Projects/3R/2012_Organisk_affald_temadag/Litteratur/09_WMR_Boldrin_et_al_Composting_and_compost_utilization.pdf		http://scholar.google.co.uk/scholar?hl=en&q=%22Composting+and+compost+utilization:+accounting+of+greenhouse+gases+and+global+warming+contributions%22&btnG=&as_sdt=1%2C5&as_sdtp=
412	http://127.0.0.1:8000/scholar_040.html	41	Influence of temperature and oxygen availability on the flux of methane and carbon dioxide from wetlands: a comparison of peat and paddy soils	http://www.tandfonline.com/doi/abs/10.1080/00380768.1996.10415097	SJ Chapman, K Kanda, H Tsuruta…	Soil science and plant …	1996		Black	Abstract Methane and carbon dioxide emissions from two Scottish peat soils and two Japanese paddy soils were compared. During aerobic incubation, CH4 uptake occurred with the peat soils showing a slightly higher activity than the paddy soils. Temperature ...	22	http://www.tandfonline.com/doi/pdf/10.1080/00380768.1996.10415097		http://scholar.google.co.uk/scholar?hl=en&q=%22Influence+of+temperature+and+oxygen+availability+on+the+flux+of+methane+and+carbon+dioxide+from+wetlands:+a+comparison+of+peat+and+paddy+soils%22&btnG=&as_sdt=1%2C5&as_sdtp=
413	http://127.0.0.1:8000/scholar_040.html	41	Groundwater flow and dissolved carbon movement in a boreal peatland	http://www.sciencedirect.com/science/article/pii/S0022169496030752	JM Waddington , NT Roulet	Journal of Hydrology	1997	Elsevier	Black	... Nilsson and Bohlin, 1993; M. Nilsson, E. Bohlin; Methane and carbon dioxide concentrations in bogs and fens—with special reference to the effects of the botanical composition of the peat. J. Ecol., 81 (1993), pp. 615–625. ...	113			http://scholar.google.co.uk/scholar?hl=en&q=%22Groundwater+flow+and+dissolved+carbon+movement+in+a+boreal+peatland%22&btnG=&as_sdt=1%2C5&as_sdtp=
414	http://127.0.0.1:8000/scholar_040.html	41	Sorption of peat humic acids to multi-walled carbon nanotubes	http://pubs.acs.org/doi/abs/10.1021/es202258q	X Wang, L Shu, Y Wang , B Xu, Y Bai…	… science & technology	2011	ACS Publications	Black	Sorption of humic acids (HAs) from a peat soil by multiwalled carbon nanotubes (MWCNTs) was examined in this work. Sorption rate of HAs to MWCNTs was dominantly controlled by their diffusion from liquid–MWCNT boundary to MWCNT surfaces. Size exclusion ...	31	http://ag.udel.edu/soilchem/readings/Wang-2011-Sorption%20of%20Peat%20Hum.pdf		http://scholar.google.co.uk/scholar?hl=en&q=%22Sorption+of+peat+humic+acids+to+multi-walled+carbon+nanotubes%22&btnG=&as_sdt=1%2C5&as_sdtp=
415	http://127.0.0.1:8000/scholar_040.html	41	Hydraulic reversals and episodic methane emissions during drought cycles in mires	http://geology.gsapubs.org/content/21/3/231.short	EA Romanowicz, DI Siegel, PH Glaser	Geology	1993		Black	... Methane would have exsolved from the peat pore water according to Henry's law as the partial pressure of gaseous CH4 in the peat decreased. Large boreal mires, such as the Glacial Lake Agassiz Peatlands, which store carbon as CH 4 and C0 2 , appear sensitive to changes ...	67			http://scholar.google.co.uk/scholar?hl=en&q=%22Hydraulic+reversals+and+episodic+methane+emissions+during+drought+cycles+in+mires%22&btnG=&as_sdt=1%2C5&as_sdtp=
416	http://127.0.0.1:8000/scholar_040.html	41	Carbendazim adsorption on montmorillonite, peat and soils	http://onlinelibrary.wiley.com/doi/10.1111/j.1365-2389.1992.tb00122.x/abstract	G Cancela, ER Taboada…	Journal of Soil …	1992	Wiley Online Library	Black	... the adsorption isotherms ofcarbendazim on montmorillonite saturated with H', CaZ+, Co2+ and Cuz+ at 20°C and 30°C. As for peat, the empirical ... The AS' values were positive for the H+ and Cu2+ samples, and negative for the CaZt and Co2' samples, which again suggests that ...	38			http://scholar.google.co.uk/scholar?hl=en&q=%22Carbendazim+adsorption+on+montmorillonite,+peat+and+soils%22&btnG=&as_sdt=1%2C5&as_sdtp=
417	http://127.0.0.1:8000/scholar_040.html	41	Stable carbon isotope composition and concentrations of CO〈 sub〉 2〈/sub〉 and CH〈 sub〉 4〈/sub〉 in the deep catotelm of a peat bog	http://www.sciencedirect.com/science/article/pii/S0016703708005693	P Steinmann, B Eilrich, M Leuenberger…	… et Cosmochimica Acta	2008	Elsevier	Black	Vertical profiles of concentration and C-isotopic composition of dissolved methane and carbon dioxide were observed over 26 months in the catotelm of a deep (6.5 m) peat bog in Switzerland. The dissolved concentrations of these gases increase with depth while CO2 ...	16			http://scholar.google.co.uk/scholar?hl=en&q=%22Stable+carbon+isotope+composition+and+concentrations+of+CO〈+sub〉+2〈/sub〉+and+CH〈+sub〉+4〈/sub〉+in+the+deep+catotelm+of+a+peat+bog%22&btnG=&as_sdt=1%2C5&as_sdtp=
418	http://127.0.0.1:8000/scholar_040.html	41	Rapid early development of circumarctic peatlands and atmospheric CH4 and CO2 variations	http://www.sciencemag.org/content/314/5797/285.short	GM MacDonald, DW Beilman, KV Kremenetski…	Science	2006	sciencemag.org	Black	... in the early Holocene, and evidence of peatland vegetation and type from our peat cores taken ... The δ 13 C CH4 values of ice from the Pakitsoq outcrop in western Greenland ... It has been suggested that major terrestrial sources contributing methane during the period from 11 to 8 ...	191	http://faculty.jsd.claremont.edu/emorhardt/159/pdfs/2007/MacDonald%20et%20al.%202006.pdf		http://scholar.google.co.uk/scholar?hl=en&q=%22Rapid+early+development+of+circumarctic+peatlands+and+atmospheric+CH4+and+CO2+variations%22&btnG=&as_sdt=1%2C5&as_sdtp=
419	http://127.0.0.1:8000/scholar_040.html	41	Stable carbon and oxygen isotopes in〈 i〉 Sphagnum fuscum〈/i〉 peat from subarctic Canada: Implications for palaeoclimate studies	http://www.sciencedirect.com/science/article/pii/S0009254109004689	P Kaislahti Tillman, S Holzkämper, P Kuhry…	Chemical …	2010	Elsevier	Black	Stable carbon and oxygen isotope ratios in single plant components in Sphagnum peat have a good potential to reveal environmental changes in peat archives. Two peat profiles, covering the past∼ 6000years, and a Sphagnum hummock from a discontinuous ...	26	http://www.geo.uni-mainz.de/Dateien/Kaislahti_et_al_CG_2010.pdf		http://scholar.google.co.uk/scholar?hl=en&q=%22Stable+carbon+and+oxygen+isotopes+in〈+i〉+Sphagnum+fuscum〈/i〉+peat+from+subarctic+Canada:+Implications+for+palaeoclimate+studies%22&btnG=&as_sdt=1%2C5&as_sdtp=
420	http://127.0.0.1:8000/scholar_040.html	41	The chromosomal basis of human neoplasia	http://www.sciencemag.org/content/221/4607/227.short	JJ Yunis	Science	1983	sciencemag.org	Black	... Biochem. 3, 133 (1971). The increase in carbon content from plant to peat is insufficient to permit such attribution. Spackman et al. (5) also find an increase in sulfur from plants to peat in one of two coring sites in the Okefenokee Swamp. ...	1241			http://scholar.google.co.uk/scholar?hl=en&q=%22The+chromosomal+basis+of+human+neoplasia%22&btnG=&as_sdt=1%2C5&as_sdtp=
421	http://127.0.0.1:8000/scholar_038.html	42	Winter fluxes of methane from Minnesota peatlands	http://link.springer.com/article/10.1007/BF00002641	NB Dise	Biogeochemistry	1992	Springer	Black	... Methane is an important greenhouse gas that has, per molecule, approximately 20 times the warming effect of CO,, and is increasing ... bers set atop the deep snow, and fluxes calculated from these were similar to fluxes from the peat surface measured ... 0 200 4m WI3 &xl CH4 (PM ...	103	http://www.sste.mmu.ac.uk/peatbog/Nancy_publications/9-Dise.NB1992.pdf		http://scholar.google.co.uk/scholar?hl=en&q=%22Winter+fluxes+of+methane+from+Minnesota+peatlands%22&btnG=&as_sdt=1%2C5&as_sdtp=
422	http://127.0.0.1:8000/scholar_038.html	42	Impacts of climate change on fire activity and fire management in the circumboreal forest	http://onlinelibrary.wiley.com/doi/10.1111/j.1365-2486.2008.01660.x/full	M Flannigan , B Stocks, M Turetsky…	Global Change …	2009	Wiley Online Library	Black	... First, carbon is lost through direct combustion. Most of this is in the form of carbon dioxide, but quantities of carbon monoxide, methane, long-chain hydrocarbons, and ... Turetsky et al. (2006) estimated that western Canadian forest and peat fires released an average of ...	185	http://127.0.0.1:8000/scholar?q=info:lRi8SVabjNMJ:scholar.google.com/&output=instlink&hl=en&as_sdt=0,5&scillfp=13565914718846908526&oi=lle		http://scholar.google.co.uk/scholar?hl=en&q=%22Impacts+of+climate+change+on+fire+activity+and+fire+management+in+the+circumboreal+forest%22&btnG=&as_sdt=1%2C5&as_sdtp=
423	http://127.0.0.1:8000/scholar_038.html	42	Activated carbon adsorption of humic substances	http://www.jstor.org/stable/41270849	MC Lee, VL Snoeyink, JC Crittenden	Journal (American Water Works …	1981	JSTOR	Black	... The humic acid was deter- mined at 420 nm, and the peat fulvic acid was measured at 330 nm.15 Lee6 studied the relationship between TOC and UV-Vis absorption, TOC and THMFP, and found both to be linear before and after carbon adsorption and alum coagu- lation. ...	185			http://scholar.google.co.uk/scholar?hl=en&q=%22Activated+carbon+adsorption+of+humic+substances%22&btnG=&as_sdt=1%2C5&as_sdtp=
424	http://127.0.0.1:8000/scholar_038.html	42	Fungal N2O production in an arable peat soil in Central Kalimantan, Indonesia	http://www.tandfonline.com/doi/abs/10.1111/j.1747-0765.2007.00201.x	Y Yanai , K Toyota, T Morishita, F Takakai…	Soil science and plant …	2007		Black	Abstract To clarify the microbiological factors that explain high N2O emission in an arable peat soil in Central Kalimantan, Indonesia, a substrate-induced respiration-inhibition experiment was conducted for N2O production. The N2O emission rate decreased by 31% ...	25	http://www.tandfonline.com/doi/full/10.1111/j.1747-0765.2007.00201.x		http://scholar.google.co.uk/scholar?hl=en&q=%22Fungal+N2O+production+in+an+arable+peat+soil+in+Central+Kalimantan,+Indonesia%22&btnG=&as_sdt=1%2C5&as_sdtp=
425	http://127.0.0.1:8000/scholar_038.html	42	Detection of methanogenic〈 i〉 Archaea〈/i〉 in peat : comparison of PCR primers targeting the〈 i〉 mcrA〈/i〉 gene	http://www.sciencedirect.com/science/article/pii/S0923250806001938	H Juottonen, PE Galand , K Yrjälä	Research in microbiology	2006	Elsevier	Black	... Abstract. Methanogens (domain Archaea) have a unique role in the carbon cycle as producers of the greenhouse gas methane (CH 4 ). Methyl-coenzyme M reductase ... The primers were applied to DNA extracts from unfertilised and ash-fertilised peat from two different depths. ...	56	http://132.203.57.253/warwickvincent/PDFfiles/PierreRM2006.pdf		http://scholar.google.co.uk/scholar?hl=en&q=%22Detection+of+methanogenic〈+i〉+Archaea〈/i〉+in+peat+:+comparison+of+PCR+primers+targeting+the〈+i〉+mcrA〈/i〉+gene%22&btnG=&as_sdt=1%2C5&as_sdtp=
426	http://127.0.0.1:8000/scholar_038.html	42	CO2 efflux from cleared mangrove peat	http://dx.plos.org/10.1371/journal.pone.0021279	CE Lovelock , RW Ruess, IC Feller	PloS one	2011		Black	We measured CO 2 efflux from mangrove soils that had been cleared for up to 20 years on the islands of Twin Cays, Belize. We also disturbed these cleared peat soils to assess what disturbance of soils after clearing may have on CO 2 efflux. CO 2 efflux from soils declines from time of ...	22	http://dx.plos.org/10.1371/journal.pone.0021279	[HTML]	http://scholar.google.co.uk/scholar?hl=en&q=%22CO2+efflux+from+cleared+mangrove+peat%22&btnG=&as_sdt=1%2C5&as_sdtp=
427	http://127.0.0.1:8000/scholar_038.html	42	Fluxes of nitrous oxide from boreal peatlands as affected by peatland type, water table level and nitrification capacity	http://link.springer.com/article/10.1007/BF02183033	K Regina, H Nykänen, J Silvola, PJ Martikainen	Biogeochemistry	1996	Springer	Black	... Fluxes of nitrous oxide were measured in situ on nine virgin and ten drained peatlands of ... enhanced after lowering of the water table in minerotrophic peat but not in ombrotrophic peat. ... 0 is an important component in the atmospheric chemistry both as a greenhouse gas and in ...	200			http://scholar.google.co.uk/scholar?hl=en&q=%22Fluxes+of+nitrous+oxide+from+boreal+peatlands+as+affected+by+peatland+type,+water+table+level+and+nitrification+capacity%22&btnG=&as_sdt=1%2C5&as_sdtp=
428	http://127.0.0.1:8000/scholar_038.html	42	Microtopography and methane flux in boreal peatlands, northern Ontario, Canada	http://www.nrcresearchpress.com/doi/abs/10.1139/b93-122	J Bubier, A Costello, TR Moore…	Canadian Journal of …	1993	NRC Research Press	Black	... may be water-filled depressions, and lawns which are relatively flat or sloping peat surfaces, usually ... Peatlands act as a major sink of carbon dioxide and a source of methane. ... (1991) suggested that northern and temperate wetlands contribute about 25% (or 115 x lo1* g CH4 . ...	99	http://home.mtholyoke.edu/courses/jbubier/pdf/Bubier92CJB71.PDF		http://scholar.google.co.uk/scholar?hl=en&q=%22Microtopography+and+methane+flux+in+boreal+peatlands,+northern+Ontario,+Canada%22&btnG=&as_sdt=1%2C5&as_sdtp=
429	http://127.0.0.1:8000/scholar_038.html	42	Environmental inventory modelling of the use of compost and peat in growth media preparation	http://www.sciencedirect.com/science/article/pii/S0921344910000959	A Boldrin , KR Hartling, M Laugen…	Resources	2010	Elsevier	Black	... as CO 2 . Thus CO 2 released by degradation of peat should be counted as a greenhouse gas (GHG). ... primarily as CO 2 . Release of this CO 2 is accounted as a GHG in this ... in the leachate was approximately 10 times higher in the compost leachate than in the peat leachate. ...	34	http://documents.er.dtu.dk/Projects/3R/2012_Organisk_affald_temadag/Litteratur/10_RCR_ALB_Peat_and_compost.pdf		http://scholar.google.co.uk/scholar?hl=en&q=%22Environmental+inventory+modelling+of+the+use+of+compost+and+peat+in+growth+media+preparation%22&btnG=&as_sdt=1%2C5&as_sdtp=
430	http://127.0.0.1:8000/scholar_038.html	42	Spatial and temporal variations of methane flux from subarctic/northern boreal fens	http://onlinelibrary.wiley.com/doi/10.1029/GB004i001p00029/full	T Moore, N Roulet , R Knowles	Global Biogeochemical Cycles	1990	Wiley Online Library	Black	... Radiocarbon isotope analysis, however, indicates that between 15 and 30% of the CH4 contains old ... If, however, a portion of the methane is derived from depths below 0.5 m in ... Northern fens generally have less vertical differentiation in structure through the peat profile than do ...	203			http://scholar.google.co.uk/scholar?hl=en&q=%22Spatial+and+temporal+variations+of+methane+flux+from+subarctic/northern+boreal+fens%22&btnG=&as_sdt=1%2C5&as_sdtp=
431	http://127.0.0.1:8000/scholar_041.html	43	Magnesite disposal of carbon dioxide	http://www.osti.gov/scitech/biblio/516030	KS Lackner , DP Butt , CH Wendt			osti.gov	Conference	... This trend towards curbing carbon dioxide emissions, regardless of its scientific merits, poses a significant economic risk to the fossil fuel power industry and ... 1GW ' N Coal Mine earth moving 190kt/day 4 > n Coal 9kt/day Power Plant 33% conversion .efficiency , CO2 24kt/day ...	53		[CITATION]	http://scholar.google.co.uk/scholar?hl=en&q=%22Magnesite+disposal+of+carbon+dioxide%22&btnG=&as_sdt=1%2C5&as_sdtp=
432	http://127.0.0.1:8000/scholar_041.html	43	Can we control the carbon dioxide in the atmosphere?	http://www.sciencedirect.com/science/article/pii/0360544277900330	FJ Dyson	Energy	1977	Elsevier	Black	... Current Can we control the carbon dioxide in the atmosphere ... of acidity and sterility that cause vegetation in natural peat-bogs to form peat rather than methane. Extensive experimentation is required to find out whether artificial peat-bogs on the required scale are either feasible ...	136	http://adamant.typepad.com/seitz/files/Dyson_Energy_1977.pdf		http://scholar.google.co.uk/scholar?hl=en&q=%22Can+we+control+the+carbon+dioxide+in+the+atmosphere?%22&btnG=&as_sdt=1%2C5&as_sdtp=
433	http://127.0.0.1:8000/scholar_041.html	43	Methane emissions from fen, bog and swamp peatlands in Quebec	http://link.springer.com/article/10.1007/BF00000851	TR Moore, R Knowles	Biogeochemistry	1990	Springer	Black	... Methane production and consumption in peat samples under laboratory conditions ... 3). During 1987, the Mt. St. Hilaire swamp (site 6) revealed a strong release of methane as the peat column thawed in early spring, though this pattern was not recorded in 1988. ...	190	http://course1.winona.edu/Mengen/Research%20Interests/GHG%20Journal%20Art/Moore%201990%20Methane%20emissions%20from%20wetlands%20in%20Quebec%20%20Biogeochem.pdf		http://scholar.google.co.uk/scholar?hl=en&q=%22Methane+emissions+from+fen,+bog+and+swamp+peatlands+in+Quebec%22&btnG=&as_sdt=1%2C5&as_sdtp=
434	http://127.0.0.1:8000/scholar_041.html	43	Peat respiration at low temperatures	http://www.sciencedirect.com/science/article/pii/S0038071798000091	SJ Chapman, M Thurlow	Soil Biology and Biochemistry	1998	Elsevier	Black	... The decomposition of peat and the release of carbon dioxide is expected to increase with temperature as a result of climate change. CO 2 emission and O 2 uptake were measured during laboratory incubations of homogenised peat samples from 15 sites in Scotland. ...	90			http://scholar.google.co.uk/scholar?hl=en&q=%22Peat+respiration+at+low+temperatures%22&btnG=&as_sdt=1%2C5&as_sdtp=
435	http://127.0.0.1:8000/scholar_041.html	43	Factors controlling large scale variations in methane emissions from wetlands	http://onlinelibrary.wiley.com/doi/10.1029/2002GL016848/full	TR Christensen , A Ekberg, L Ström…	Geophysical …	2003	Wiley Online Library	Black	... for the understanding of past and prediction of future atmospheric greenhouse gas concentrations and the ... 2. The relationship between mean organic acid concentrations in the peat water (mean ... Chappelaz, JA, IY Fung, and AM Thompson, The atmospheric CH4 increase since ...	201	http://onlinelibrary.wiley.com/doi/10.1029/2002GL016848/full	[HTML]	http://scholar.google.co.uk/scholar?hl=en&q=%22Factors+controlling+large+scale+variations+in+methane+emissions+from+wetlands%22&btnG=&as_sdt=1%2C5&as_sdtp=
436	http://127.0.0.1:8000/scholar_041.html	43	Restored cut-away peatland as a sink for atmospheric CO2	http://link.springer.com/article/10.1007/s004420050891	ES Tuittila , VM Komulainen, H Vasander, J Laine	Oecologia	1999	Springer	Black	... In connection with CH4 measurements (results not given here), RTOT was also measured with an opaque aluminum chamber technique (as ... bare peat surfaces was lowered by about 30%, and by raising the water level to or above the peat surface CO2 emission was ...	136			http://scholar.google.co.uk/scholar?hl=en&q=%22Restored+cut-away+peatland+as+a+sink+for+atmospheric+CO2%22&btnG=&as_sdt=1%2C5&as_sdtp=
437	http://127.0.0.1:8000/scholar_041.html	43	A three-year study of controls on methane emissions from two Michigan peatlands	http://link.springer.com/article/10.1007/BF00002570	RD Shannon, JR White	Biogeochemistry	1994	Springer	Black	... declined to -16 cm. In contrast J 1 to the 1991 summer, methane fluxes quickly rebounded to 70-90 mg CH4 m -2 d-' through September 1992 when water levels returned to the peat surface in mid-July. Unlike sites 1, 2, and ...	152			http://scholar.google.co.uk/scholar?hl=en&q=%22A+three-year+study+of+controls+on+methane+emissions+from+two+Michigan+peatlands%22&btnG=&as_sdt=1%2C5&as_sdtp=
438	http://127.0.0.1:8000/scholar_041.html	43	Prediction of nitrous oxide fluxes from managed grassland on peat soil using a simple empirical model	https://library.wur.nl/ojs/index.php/njas/article/view/541	GL Velthof, JG Koops, JH Duyzer…	NJAS wageningen journal …	1996		Black	Abstract Three measurement campaigns were carried out to answer questions related to the factors controlling variations in nitrous oxide (N2O) fluxes from intensively managed grassland on peat soil, comparison of flux measurements with a closed flux chamber ...	23	https://library.wur.nl/ojs/index.php/njas/article/download/541/255		http://scholar.google.co.uk/scholar?hl=en&q=%22Prediction+of+nitrous+oxide+fluxes+from+managed+grassland+on+peat+soil+using+a+simple+empirical+model%22&btnG=&as_sdt=1%2C5&as_sdtp=
439	http://127.0.0.1:8000/scholar_041.html	43	Multiproxy record of late Pleistocene–Holocene climate and vegetation changes from a peat bog in Patagonia	http://www.sciencedirect.com/science/article/pii/S0033589400922063	E Pendall , V Markgraf, JWC White , M Dreier…	Quaternary …	2001	Elsevier	Black	... Deuterium, carbon-13, and oxygen-18 in tree rings and peat deposits in relation to climateUniversity of Groningen (1983). 6; CD Charles, RG Fairbanks; ... A high resolution record of atmospheric CO 2 content from carbon isotopes in peat. Nature, 367 (1994), pp. 153–156. ...	95	http://www.researchgate.net/publication/216894284_Multiproxy_record_of_late_Pleistocene-Holocene_climate_and_vegetation_changes_from_a_peat_bog_in_Patagonia/file/9fcfd50b6bb151371a.pdf		http://scholar.google.co.uk/scholar?hl=en&q=%22Multiproxy+record+of+late+Pleistocene–Holocene+climate+and+vegetation+changes+from+a+peat+bog+in+Patagonia%22&btnG=&as_sdt=1%2C5&as_sdtp=
440	http://127.0.0.1:8000/scholar_041.html	43	Assessing the probability of carbon and greenhouse gas benefit from the management of peat soils	http://www.sciencedirect.com/science/article/pii/S0048969710000586	F Worrall, MJ Bell, A Bhogal	Science of the Total Environment	2010	Elsevier	Black	This study proposes a method for assessing the probability that land management interventions will lead to an improvement in the carbon sink represented by peat soils. The method is able to: combine studies of different carbon uptake and release pathways in ...	25			http://scholar.google.co.uk/scholar?hl=en&q=%22Assessing+the+probability+of+carbon+and+greenhouse+gas+benefit+from+the+management+of+peat+soils%22&btnG=&as_sdt=1%2C5&as_sdtp=
441	http://127.0.0.1:8000/scholar_042.html	44	Seasonal CO2 balances of a subarctic mire	http://onlinelibrary.wiley.com/doi/10.1029/2000JD900481/full	M Aurela, T Laurila, JP Tuovinen	Journal of Geophysical …	2001	Wiley Online Library	Black	... A peat sample from a flark had a pH value of 5.2, which is normal for a mesotrophic ... The LI-6262 was operated in differential mode using syn- thetic air with a known CO2 concentration (- 300 ... AURELA ET AL.: SEASONAL CARBON DIOXIDE BALANCES OF SUBARCTIC MIRE ...	82	http://onlinelibrary.wiley.com/doi/10.1029/2000JD900481/pdf		http://scholar.google.co.uk/scholar?hl=en&q=%22Seasonal+CO2+balances+of+a+subarctic+mire%22&btnG=&as_sdt=1%2C5&as_sdtp=
442	http://127.0.0.1:8000/scholar_042.html	44	Water‐table management in lowland UK peat soils and its potential impact on CO2 emission	http://onlinelibrary.wiley.com/doi/10.1111/j.1475-2743.2007.00125.x/full	C Kechavarzi, Q Dawson…	Soil use and …	2007	Wiley Online Library	Black	Abstract The rate of oxidation of peat soils is highly seasonal and varies with temperature and soil moisture content. Large variations in soil moisture content result in wet–dry cycles that can enhance peat degradation. Water-table management plays a crucial role in ...	22			http://scholar.google.co.uk/scholar?hl=en&q=%22Water‐table+management+in+lowland+UK+peat+soils+and+its+potential+impact+on+CO2+emission%22&btnG=&as_sdt=1%2C5&as_sdtp=
443	http://127.0.0.1:8000/scholar_042.html	44	Methane dynamics in northern peatlands: a review	http://www.sciencedirect.com/science/article/pii/S1002016009000034	DYF Lai	Pedosphere	2009	Elsevier	Black	... Some anthropogenic activities including forestry, peat harvesting and industrial emission of ... global carbon cycle; greenhouse gas; methane oxidation; methanogenesis; methanotrophy. ... Nitrogen deposition effects on carbon dioxide and methane emissions from temperate ...	98	http://www.geog.mcgill.ca/grad/lai/reprints/Lai_2009_Pedosphere.pdf		http://scholar.google.co.uk/scholar?hl=en&q=%22Methane+dynamics+in+northern+peatlands:+a+review%22&btnG=&as_sdt=1%2C5&as_sdtp=
444	http://127.0.0.1:8000/scholar_042.html	44	Influence of water table level and soil properties on emissions of greenhouse gases from cultivated peat soil	http://www.sciencedirect.com/science/article/pii/S0038071711000046	Ö Berglund, K Berglund	Soil Biology and Biochemistry	2011	Elsevier	Black	... We attribute the observed differences in GHG emissions between the soils to the contrasting dry matter liability and soil physical properties. ... Keywords. Peat soils; Greenhouse gas emission; Groundwater level; Agricultural soils; Lysimeter; CO 2 ; Organic soils. ...	32	http://pub.epsilon.slu.se/8046/1/berglund_o_etal_110411.pdf		http://scholar.google.co.uk/scholar?hl=en&q=%22Influence+of+water+table+level+and+soil+properties+on+emissions+of+greenhouse+gases+from+cultivated+peat+soil%22&btnG=&as_sdt=1%2C5&as_sdtp=
445	http://127.0.0.1:8000/scholar_042.html	44	The limits to peat bog growth	http://rstb.royalsocietypublishing.org/content/303/1117/605.short	RS Clymo	… Transactions of the Royal Society of …	1984		Black	... The solubility of methane in water is exceeded, however, and much of the methane may in practice be lost by mass flow of bubbles ... The most recent (Kivinen & Pakarinen 1981) is that peat covers about 3.0% of the Earth's land surface and that the dry mass of carbon in deep ...	700	http://webspace.qmul.ac.uk/clymo/Clymo-article-PDFs/25-Clymo-1984-Limits-to-growth.pdf		http://scholar.google.co.uk/scholar?hl=en&q=%22The+limits+to+peat+bog+growth%22&btnG=&as_sdt=1%2C5&as_sdtp=
446	http://127.0.0.1:8000/scholar_042.html	44	Carbon balance in tussock tundra under ambient and elevated atmospheric CO2	http://link.springer.com/article/10.1007/BF00317199	NE Grulke, GH Riechers, WC Oechel , U Hjelm…	Oecologia	1990	Springer	Black	... for the growing season (39.8 g C m-ay-1). The carbon balance of wet coastal tundra microcosms from the same site in controlled-growth chamber experi- ments also yielded a net gain (87.5 g C m-Zy - t) at ambi- ent temperature and CO2 levels. Carbon dioxide, tem- perature ...	205			http://scholar.google.co.uk/scholar?hl=en&q=%22Carbon+balance+in+tussock+tundra+under+ambient+and+elevated+atmospheric+CO2%22&btnG=&as_sdt=1%2C5&as_sdtp=
447	http://127.0.0.1:8000/scholar_042.html	44	H and S Page (2006) PEAT - CO2		A Hooijer, M Silvius, H Wösten				Grey		3		[CITATION]	http://scholar.google.co.uk/scholar?hl=en&q=%22H+and+S+Page+(2006)+PEAT+-+CO2%22&btnG=&as_sdt=1%2C5&as_sdtp=
448	http://127.0.0.1:8000/scholar_042.html	44	Atmosphere‐wetland carbon exchanges: Scale dependency of CO2 and CH4 exchange on the developmental topography of a peatland	http://onlinelibrary.wiley.com/doi/10.1029/95GB03871/full	JM Waddington , NT Roulet	Global Biogeochemical Cycles	1996	Wiley Online Library	Black	... Northem peatlands have been and may still be net accumulators of carbon dioxide (CO2). Based on records of peat accumulation and profiles of peat density and carbon content ... Pearlands are also a major source of atmospheric methane (CH4), contributing between 30 and 35 ...	173	http://onlinelibrary.wiley.com/doi/10.1029/95GB03871/pdf		http://scholar.google.co.uk/scholar?hl=en&q=%22Atmosphere‐wetland+carbon+exchanges:+Scale+dependency+of+CO2+and+CH4+exchange+on+the+developmental+topography+of+a+peatland%22&btnG=&as_sdt=1%2C5&as_sdtp=
449	http://127.0.0.1:8000/scholar_042.html	44	Priming effects of sugars, amino acids, organic acids and catechol on the mineralization of lignin and peat	http://onlinelibrary.wiley.com/doi/10.1002/1522-2624(200206)165:3%3C261::AID-JPLN261%3E3.0.CO;2-I/full	U Hamer, B Marschner	Journal of Plant Nutrition and Soil …	2002	Wiley Online Library	Black	... Get PDF (120K). Keywords: priming effect; carbon turnover; 14 C; dissolved organic carbon; lignin; peat. Abstract. ...	82			http://scholar.google.co.uk/scholar?hl=en&q=%22Priming+effects+of+sugars,+amino+acids,+organic+acids+and+catechol+on+the+mineralization+of+lignin+and+peat%22&btnG=&as_sdt=1%2C5&as_sdtp=
450	http://127.0.0.1:8000/scholar_042.html	44	Anaerobic microbial biogeochemistry in a northern bog: acetate as a dominant metabolic end product	http://onlinelibrary.wiley.com/doi/10.1029/2001GB001402/full	KN Duddleston , MA Kinney, RP Kiene …	Global …	2002	Wiley Online Library	Black	... when the water table was no more than 15 cm below the surface of the peat (Figure 4). Methane was measured ... 7–120 times higher than CH 4 , indicating that acetate was a dominant metabolic end product in Turnagain Bog peat (Table 1). Carbon dioxide was produced ...	86	http://onlinelibrary.wiley.com/doi/10.1029/2001GB001402/full	[HTML]	http://scholar.google.co.uk/scholar?hl=en&q=%22Anaerobic+microbial+biogeochemistry+in+a+northern+bog:+acetate+as+a+dominant+metabolic+end+product%22&btnG=&as_sdt=1%2C5&as_sdtp=
451	http://127.0.0.1:8000/scholar_044.html	45	Effects of disturbances on the carbon balance of tropical peat swamp forests	http://onlinelibrary.wiley.com/doi/10.1111/j.1365-2486.2012.02793.x/full	T Hirano, H Segah , K Kusin, S Limin…	Global Change …	2012	Wiley Online Library	Black	Abstract Tropical peatlands have accumulated huge soil carbon over millennia. However, the carbon pool is presently disturbed on a large scale by land development and management, and consequently has become vulnerable. Peat degradation occurs most ...	19	http://127.0.0.1:8000/scholar?q=info:B7X0oT3HRF8J:scholar.google.com/&output=instlink&hl=en&as_sdt=0,5&scillfp=10439265985664418757&oi=lle		http://scholar.google.co.uk/scholar?hl=en&q=%22Effects+of+disturbances+on+the+carbon+balance+of+tropical+peat+swamp+forests%22&btnG=&as_sdt=1%2C5&as_sdtp=
452	http://127.0.0.1:8000/scholar_044.html	45	Emissions of nitrogen oxides in pulverized peat combustion between 730 and 900 C	http://www.sciencedirect.com/science/article/pii/0016236189901543	MJ Aho, JT Rantanen	Fuel	1989	Elsevier	Black	... Cover image Cover image. Full paper. Emissions of nitrogen oxides in pulverized peat combustion between 730 and 900 °C. ... Unlike NO, the formation of N 2 O was not sensitive to oxygen content of the reaction environment, and it decreased with increasing ratio in the peat. ...	49			http://scholar.google.co.uk/scholar?hl=en&q=%22Emissions+of+nitrogen+oxides+in+pulverized+peat+combustion+between+730+and+900+C%22&btnG=&as_sdt=1%2C5&as_sdtp=
453	http://127.0.0.1:8000/scholar_044.html	45	Peat depth, minerals below peat , carbon , fires and its characteristics a long transect between Tangkiling and Kasongan		HDV Boehm, Y Sulistiyanto	…			Conference		3		[CITATION]	http://scholar.google.co.uk/scholar?hl=en&q=%22Peat+depth,+minerals+below+peat+,+carbon+,+fires+and+its+characteristics+a+long+transect+between+Tangkiling+and+Kasongan%22&btnG=&as_sdt=1%2C5&as_sdtp=
454	http://127.0.0.1:8000/scholar_044.html	45	Land management as a factor controlling dissolved organic carbon release from upland peat soils 2: Changes in DOC productivity over four decades	http://www.sciencedirect.com/science/article/pii/S0048969710008995	B Clutterbuck, AR Yallop	Science of the Total Environment	2010	Elsevier	Black	Increasing DOC concentrations in surface waters have been observed across parts of Europe and North America over the past few decades. Most proposed explanations for these widespread trends invoke climate change or reductions in sulphate deposition. However, ...	24			http://scholar.google.co.uk/scholar?hl=en&q=%22Land+management+as+a+factor+controlling+dissolved+organic+carbon+release+from+upland+peat+soils+2:+Changes+in+DOC+productivity+over+four+decades%22&btnG=&as_sdt=1%2C5&as_sdtp=
455	http://127.0.0.1:8000/scholar_044.html	45	Phylogenetic analysis and in situ identification of bacteria community composition in an acidic Sphagnum peat bog	http://aem.asm.org/content/72/3/2110.short	SN Dedysh, TA Pankratov, SE Belova…	Applied and …	2006	Am Soc Microbiol	Black	... Siberia. The environmental and ecological significance of peat soils is immense because of the well-recognized role of the northern wetlands in the global carbon budget and emission of the greenhouse gas methane. Due to ...	172	http://aem.asm.org/content/72/3/2110.full		http://scholar.google.co.uk/scholar?hl=en&q=%22Phylogenetic+analysis+and+in+situ+identification+of+bacteria+community+composition+in+an+acidic+Sphagnum+peat+bog%22&btnG=&as_sdt=1%2C5&as_sdtp=
456	http://127.0.0.1:8000/scholar_044.html	45	The effect of vascular plants on carbon turnover and methane emissions from a tundra wetland	http://onlinelibrary.wiley.com/doi/10.1046/j.1365-2486.2003.00655.x/full	L Ström, A Ekberg, M Mastepanov…	Global Change …	2003	Wiley Online Library	Black	... vascular plants affect carbon flow and the formation and emission of the greenhouse gas methane (CH 4 ... budget and have a great potential for exchange of the greenhouse gases carbon dioxide (CO 2 ... 4 by gas chromatography within 3 h after the collection of the peat cores and ...	155	http://www.des.ucdavis.edu/faculty/Rejmankova/Reading_Oct18-22.pdf		http://scholar.google.co.uk/scholar?hl=en&q=%22The+effect+of+vascular+plants+on+carbon+turnover+and+methane+emissions+from+a+tundra+wetland%22&btnG=&as_sdt=1%2C5&as_sdtp=
457	http://127.0.0.1:8000/scholar_044.html	45	Methane emissions from peat soils (organic soils, histosols): facts, MRV-ability, emission factors.	http://www.cabdirect.org/abstracts/20093336600.html	J Couwenberg	Methane emissions from peat soils (organic soils	2009	cabdirect.org	Grey	Abstract Huge reductions of carbon dioxide (CO 2) and nitrous oxide (N 2 O) emissions can be attained by rewetting drained peatlands. A post-2012 framework aiming at peatland rewetting must, however, also address associated methane (CH 4) emissions. The ...	16			http://scholar.google.co.uk/scholar?hl=en&q=%22Methane+emissions+from+peat+soils+(organic+soils,+histosols):+facts,+MRV-ability,+emission+factors.%22&btnG=&as_sdt=1%2C5&as_sdtp=
458	http://127.0.0.1:8000/scholar_044.html	45	Radiocarbon datability of peat , marl, caliche, and archaeological materials	http://www.sciencemag.org/content/114/2951/55.short	HH Bartlett	Science	1951	sciencemag.org	Black	... marl and, on the other, in deposition of calcareous (as op- posed to fairly acid) peat. ... only "dead" carbon, in contact with rain water satu- rated with atmospheric CO2, would yield ... underground into a lake, pond, or river, the equili- brated system, water-carbon dioxide-carbonic acid ...	35		[CITATION]	http://scholar.google.co.uk/scholar?hl=en&q=%22Radiocarbon+datability+of+peat+,+marl,+caliche,+and+archaeological+materials%22&btnG=&as_sdt=1%2C5&as_sdtp=
459	http://127.0.0.1:8000/scholar_044.html	45	Environmental controls on ground cover species composition and productivity in a boreal black spruce forest	http://link.springer.com/article/10.1007/s004420100719	KE Bisbee, ST Gower, JM Norman, EV Nordheim	Oecologia	2001	Springer	Black	... ground cover. The large, but differing, peat carbon con- tent of Sphagnum- versus feathermoss-dominated boreal forests and peatlands necessitates the need to accurately quantify fraction ground cover. Additional validation of ...	115			http://scholar.google.co.uk/scholar?hl=en&q=%22Environmental+controls+on+ground+cover+species+composition+and+productivity+in+a+boreal+black+spruce+forest%22&btnG=&as_sdt=1%2C5&as_sdtp=
460	http://127.0.0.1:8000/scholar_044.html	45	A model of peat bog growth	http://link.springer.com/chapter/10.1007/978-3-642-66760-2_9	RS Clymo	Production ecology of British moors and montane …	1978	Springer	Black	... Peat Characteristics. The seven parameter values measured are shown in Table 2. Values for p and L were measured directly. The aerobic decay rate, OCt' was measured on four similar lawn sites, within 200 m, as integrated carbon dioxide flux using (6)	140			http://scholar.google.co.uk/scholar?hl=en&q=%22A+model+of+peat+bog+growth%22&btnG=&as_sdt=1%2C5&as_sdtp=
461	http://127.0.0.1:8000/scholar_043.html	46	Peatland hydrology and carbon release: why small-scale process matters	http://rsta.royalsocietypublishing.org/content/363/1837/2891.short	J Holden	… Transactions of the Royal Society A: …	2005		Black	... Carbon dioxide production results from mineralization of soil organic carbon and plant respiration. ... this carbon into CH 4 , which is much more potent as a greenhouse gas than CO ... In addition, the rate of peat decomposition will increase with lowered water tables, and effectively ...	153	http://rsta.royalsocietypublishing.org/content/363/1837/2891.long		http://scholar.google.co.uk/scholar?hl=en&q=%22Peatland+hydrology+and+carbon+release:+why+small-scale+process+matters%22&btnG=&as_sdt=1%2C5&as_sdtp=
462	http://127.0.0.1:8000/scholar_043.html	46	Factors affecting the mechanism of the adsorption of arsenic species on activated carbon	http://www.sciencedirect.com/science/article/pii/089268759500017K	L Lorenzen, JSJ Van Deventer, WM Landi	Minerals Engineering	1995	Elsevier	Black	... A better fit was obtained than with a Langmuir isotherm. The Effect of Carbon Type Due to the relatively low loadings achieved with coconut-shell carbon, two new carbon types, an extruded peat-based carbon and a coal-based carbon, were tested. ...	134			http://scholar.google.co.uk/scholar?hl=en&q=%22Factors+affecting+the+mechanism+of+the+adsorption+of+arsenic+species+on+activated+carbon%22&btnG=&as_sdt=1%2C5&as_sdtp=
463	http://127.0.0.1:8000/scholar_043.html	46	Contrasting denitrifier communities relate to contrasting N2O emission patterns from acidic peat soils in arctic tundra	http://www.nature.com/ismej/journal/v6/n5/abs/ismej2011172a.html	K Palmer, C Biasi , MA Horn	The ISME journal	2011	nature.com	Black	Abstract Cryoturbated peat circles (that is, bare surface soil mixed by frost action; pH 3–4) in the Russian discontinuous permafrost tundra are nitrate-rich 'hotspots' of nitrous oxide (N 2 O) emissions in arctic ecosystems, whereas adjacent unturbated peat areas are not. N 2 O ...	25	http://www.nature.com/ismej/journal/v6/n5/full/ismej2011172a.html		http://scholar.google.co.uk/scholar?hl=en&q=%22Contrasting+denitrifier+communities+relate+to+contrasting+N2O+emission+patterns+from+acidic+peat+soils+in+arctic+tundra%22&btnG=&as_sdt=1%2C5&as_sdtp=
464	http://127.0.0.1:8000/scholar_043.html	46	EFFECT OF IN-SITU GAS ACCUMULATION ON THE HYDRAULIC CONDUCTIVITY OF PEAT .	http://journals.lww.com/soilsci/Abstract/1992/05000/EFFECT_OF_IN_SITU_GAS_ACCUMULATION_ON_THE.7.aspx	WD Reynolds, DA Brown, SP Mathur, RP Overend	Soil Science	1992		Black	... Laboratory measure- ments of hydraulic conductivity, volumetric water content, volumetric gas content, gaseous methane concentration, and gaseous carbon dioxide concentration are made over time on repacked (disturbed) columns of peat through which water flows ...	57			http://scholar.google.co.uk/scholar?hl=en&q=%22EFFECT+OF+IN-SITU+GAS+ACCUMULATION+ON+THE+HYDRAULIC+CONDUCTIVITY+OF+PEAT+.%22&btnG=&as_sdt=1%2C5&as_sdtp=
465	http://127.0.0.1:8000/scholar_043.html	46	Material losses in liquefaction of raw peat with carbon monoxide	http://www.sciencedirect.com/science/article/pii/0016236187901244	P Björnbom, E Björnbom	Fuel	1987	Elsevier	Black	The loss of organic material into the aqueous and gas phases in the liquefaction of raw peat with≈ 90 wt% moisture content has been studied. The raw material was treated with CO at an initial pressure of 5.5–8.3 MPa and a temperature of 300–350° C in the presence of ...	11			http://scholar.google.co.uk/scholar?hl=en&q=%22Material+losses+in+liquefaction+of+raw+peat+with+carbon+monoxide%22&btnG=&as_sdt=1%2C5&as_sdtp=
466	http://127.0.0.1:8000/scholar_043.html	46	Peat record reflecting Holocene climatic change in the Zoigê Plateau and AMS radiocarbon dating	http://link.springer.com/article/10.1360/02tb9013	W Zhou, X Lu, Z Wu, L Deng, AJT Jull…	Chinese Science …	2002	Springer	Black	... Determinations of the organic carbon content (%) of the peat samples were carried out using the Walkley-Black technique, the error of measurement ˘ 0.2%; peat sediment consists of peat and inorganic debris materials. The ...	110	http://www.hxch.com.cn/UploadFile/Download/2007/11/2007111973129169.pdf		http://scholar.google.co.uk/scholar?hl=en&q=%22Peat+record+reflecting+Holocene+climatic+change+in+the+Zoigê+Plateau+and+AMS+radiocarbon+dating%22&btnG=&as_sdt=1%2C5&as_sdtp=
467	http://127.0.0.1:8000/scholar_043.html	46	Estimating and valuing the carbon sequestered in softwood and hardwood trees, timber products and forest soils in Wales	http://www.sciencedirect.com/science/article/pii/S0301479700903888	IJ Bateman , AA Lovett	Journal of Environmental Management	2000	Elsevier	Black	... Peat erosion in upland Scotland, Carbon Sequestration in Vegetation and SoilsInstitute of Terrestrial ... Effect of temperature and moisture on carbon dioxide evolution in a mixed deciduous forest floor. ... The social costs of greenhouse gas emissions: an expected value approach. ...	93	http://www.researchgate.net/publication/223567241_Estimating_and_valuing_the_carbon_sequestered_in_softwood_and_hardwood_trees_timber_products_and_forest_soils_in_Wales/file/72e7e52a2f641ac147.pdf		http://scholar.google.co.uk/scholar?hl=en&q=%22Estimating+and+valuing+the+carbon+sequestered+in+softwood+and+hardwood+trees,+timber+products+and+forest+soils+in+Wales%22&btnG=&as_sdt=1%2C5&as_sdtp=
468	http://127.0.0.1:8000/scholar_043.html	46	Determination of recent apparent carbon accumulation in peat using dated fire horizons	http://kbd.kew.org/kbd/detailedresult.do?id=89520	J Alm , K Tolonen , H Vasander	International workshop on carbon …	1992		Conference	Alm J, Tolonen K, Vasander H. 1992 [1993] Determination of recent apparent carbon accumulation in peat using dated fire horizons. In: International workshop on carbon cycling in boreal peatlands and climate change, Hyytiala forestry station, Finland, 1992. Suo ( ...	20		[CITATION]	http://scholar.google.co.uk/scholar?hl=en&q=%22Determination+of+recent+apparent+carbon+accumulation+in+peat+using+dated+fire+horizons%22&btnG=&as_sdt=1%2C5&as_sdtp=
469	http://127.0.0.1:8000/scholar_043.html	46	Op den Camp HJM. 2010. Global prevalence of methane oxidation by symbiotic bacteria in peat -moss ecosystems		N Kip , JF Van Winden, Y Pan, L Bodrossy , GJ Reichart…			Nature Geoscience	Black		24		[CITATION]	http://scholar.google.co.uk/scholar?hl=en&q=%22Op+den+Camp+HJM.+2010.+Global+prevalence+of+methane+oxidation+by+symbiotic+bacteria+in+peat+-moss+ecosystems%22&btnG=&as_sdt=1%2C5&as_sdtp=
470	http://127.0.0.1:8000/scholar_043.html	46	Adsorption of Congo red from aqueous solution onto calcium-rich fly ash	http://www.sciencedirect.com/science/article/pii/S0021979704002772	B Acemioğlu	Journal of Colloid and Interface Science	2004	Elsevier	Black	... But the use of activated carbon is not suitable for developing countries because of its high cost. The use of low-cost adsorbents such as clay minerals [3], [4] and [5], fly ash [6], [7], [8] and [9], peat [10] and [11], wood powder [12] and [13], bark [14] and [15], and lignin [16] is more ...	202			http://scholar.google.co.uk/scholar?hl=en&q=%22Adsorption+of+Congo+red+from+aqueous+solution+onto+calcium-rich+fly+ash%22&btnG=&as_sdt=1%2C5&as_sdtp=
471	http://127.0.0.1:8000/scholar_045.html	47	Carbon cycle and the rate of vertical accumulation of peat in the Mississippi river deltaic plain	http://www.osti.gov/scitech/biblio/5230563	RD DeLaune, CJ Smith	Southeast. Geol.;(United States)	1984	osti.gov	Black	Save searches, create alerts, and export data: Sign In or Create Account. ...	20		[CITATION]	http://scholar.google.co.uk/scholar?hl=en&q=%22Carbon+cycle+and+the+rate+of+vertical+accumulation+of+peat+in+the+Mississippi+river+deltaic+plain%22&btnG=&as_sdt=1%2C5&as_sdtp=
472	http://127.0.0.1:8000/scholar_045.html	47	A comparison of different methods for the measurement of dissolved gas gradients in waterlogged peat cores	http://www.sciencedirect.com/science/article/pii/0167701295000704	KL Thomas, D Price, D Lloyd	Journal of microbiological methods	1995	Elsevier	Black	... Methane and carbon dioxide concentrations in bogs and fens - with special reference to the effects of the botanical composition of the peat. J. Ecol., 81 (1993), pp. 615–625. ... The role of wetland plants in the diurnal control of methane and carbon dioxide in peat. Soil Biol. Biochem ...	22			http://scholar.google.co.uk/scholar?hl=en&q=%22A+comparison+of+different+methods+for+the+measurement+of+dissolved+gas+gradients+in+waterlogged+peat+cores%22&btnG=&as_sdt=1%2C5&as_sdtp=
473	http://127.0.0.1:8000/scholar_045.html	47	Bacterial degradation of styrene in waste gases using a peat filter	http://link.springer.com/article/10.1007/s002530051126	M Arnold, A Reittu, A Von Wright…	Applied microbiology …	1997	Springer	Black	... Filter KH2PO4 (glA1 peat) NH4NO3 (glA1 peat) Nutrient addition (glA1 peat) Removal rate (gmA3 hA1) ... Production of CO2 C, biomass C and intermediates from styrene All the isolates grew with production of carbon dioxide at the styrene concentration of 0.02% (v/v) (Fig. 4A). ...	100			http://scholar.google.co.uk/scholar?hl=en&q=%22Bacterial+degradation+of+styrene+in+waste+gases+using+a+peat+filter%22&btnG=&as_sdt=1%2C5&as_sdtp=
474	http://127.0.0.1:8000/scholar_045.html	47	Acidophilic Methanotrophic Communities fromSphagnum Peat Bogs	http://aem.asm.org/content/64/3/922.short	SN Dedysh, NS Panikov, JM Tiedje	Applied and environmental …	1998	Am Soc Microbiol	Black	... Enrichment and morphological diversity.Methanotrophic communities were successfully enriched from all peat samples, as judged by ... Methane and oxygen were consumed at approximately the same rate, and the two main products were carbon dioxide and biomass (Fig. ...	125	http://aem.asm.org/content/64/3/922.full		http://scholar.google.co.uk/scholar?hl=en&q=%22Acidophilic+Methanotrophic+Communities+fromSphagnum+Peat+Bogs%22&btnG=&as_sdt=1%2C5&as_sdtp=
475	http://127.0.0.1:8000/scholar_045.html	47	Moss as High Performance Sodium Ion Battery Anodes Ding		CNFD from Peat			Jia	Black		4		[CITATION]	http://scholar.google.co.uk/scholar?hl=en&q=%22Moss+as+High+Performance+Sodium+Ion+Battery+Anodes+Ding%22&btnG=&as_sdt=1%2C5&as_sdtp=
476	http://127.0.0.1:8000/scholar_045.html	47	Life cycle assessment of palm biodiesel: revealing facts and benefits for sustainability	http://www.sciencedirect.com/science/article/pii/S0306261909001597	KF Yee, KT Tan , AZ Abdullah, KT Lee	Applied Energy	2009	Elsevier	Black	... 3.2. Greenhouse gas assessment. ... Hence, GHG assessment needs to be carried out to determine the effect of biodiesel utilization on GHG emission. ... Plantation of oil palm on the drained peat land also contributes to the emissions of CO 2, which leads to most peat carbon above ...	138			http://scholar.google.co.uk/scholar?hl=en&q=%22Life+cycle+assessment+of+palm+biodiesel:+revealing+facts+and+benefits+for+sustainability%22&btnG=&as_sdt=1%2C5&as_sdtp=
477	http://127.0.0.1:8000/scholar_045.html	47	Methane fluxes on boreal peatlands of different fertility and the effect of long‐term experimental lowering of the water table on flux rates	http://onlinelibrary.wiley.com/doi/10.1029/97GB02732/full	H Nykänen, J Alm , J Silvola, K Tolonen …	Global …	1998	Wiley Online Library	Black	... The peat temperature measured at 30 cm depth was chosen for the statistical analyses because it ... In 1992, the CH 4 and CO2 con- centrations in the samples from Ilomantsi were ... Methane was analyzed using a Shimadzu 14A GC with a FID, and carbon dioxide from the same ...	209	http://onlinelibrary.wiley.com/doi/10.1029/97GB02732/pdf		http://scholar.google.co.uk/scholar?hl=en&q=%22Methane+fluxes+on+boreal+peatlands+of+different+fertility+and+the+effect+of+long‐term+experimental+lowering+of+the+water+table+on+flux+rates%22&btnG=&as_sdt=1%2C5&as_sdtp=
478	http://127.0.0.1:8000/scholar_045.html	47	Northern Canadian wetlands: net ecosystem CO2 exchange and climatic change	http://link.springer.com/article/10.1023/A:1005468920206	JM Waddington , TJ Griffis , WR Rouse	Climatic change	1998	Springer	Black	... Grulke, N.: 1993, 'recent change of arctic tundra ecosystems from a net carbon dioxide sink to ... Roulet, NT: 1991, 'Water table and peat surface level ﬂuctuations in a subarctic fen ... and Roulet, NT: 1996, 'Atmosphere-wetland carbon exchanges: Scale dependency of CO2 and CH4 ...	69	http://www.biometeorology.umn.edu/pdf/N_Canadian_wet.pdf		http://scholar.google.co.uk/scholar?hl=en&q=%22Northern+Canadian+wetlands:+net+ecosystem+CO2+exchange+and+climatic+change%22&btnG=&as_sdt=1%2C5&as_sdtp=
479	http://127.0.0.1:8000/scholar_045.html	47	Effect of forest drainage on peat carbon balance at Lakkasuo mire, Central Finland		K Minkkinen, S Jauhiainen, J Laine	Northern Peatlands in Global Climatic Change			Conference		3		[CITATION]	http://scholar.google.co.uk/scholar?hl=en&q=%22Effect+of+forest+drainage+on+peat+carbon+balance+at+Lakkasuo+mire,+Central+Finland%22&btnG=&as_sdt=1%2C5&as_sdtp=
480	http://127.0.0.1:8000/scholar_045.html	47	Evidence for a mechanism driving recent observed trends in dissolved organic carbon release from upland peat soils.	http://www.cabdirect.org/abstracts/20083187843.html	AR Yallop, SM White, B Clutterbuck…	Shaping a vision for the …	2008	cabdirect.org	Book chapter	Abstract Soil storage forms a crucial component of global carbon budgets; however, there is evidence of increasing losses from this pool. In addition to climate concerns, carbon loss from upland peat creates a significant problem for water supply utilities. We measured ...	16			http://scholar.google.co.uk/scholar?hl=en&q=%22Evidence+for+a+mechanism+driving+recent+observed+trends+in+dissolved+organic+carbon+release+from+upland+peat+soils.%22&btnG=&as_sdt=1%2C5&as_sdtp=
481	http://127.0.0.1:8000/scholar_046.html	48	Carbon dioxide partial pressure and 13C content of north temperate and boreal lakes at spring ice melt	http://cat.inist.fr/?aModele=afficheN&cpsidt=1071510	RG Striegl, P Kortelainen , JP Chanton …	Limnology and …	2001		Black	... Finland. ; Minnesota. ; Wisconsin. ; carbon dioxide. ; partial pressure. ; C-13. ; lakes. ; meltwater. ; hydrochemistry. ; ice. ; degassing. ; C-13/C-12. ; stable isotopes. ; respiration. ; organic carbon. ; dissolved materials. ; peat bogs. ; lake sediments. ; Scandinavia. ; Europe. ; United States ...	109			http://scholar.google.co.uk/scholar?hl=en&q=%22Carbon+dioxide+partial+pressure+and+13C+content+of+north+temperate+and+boreal+lakes+at+spring+ice+melt%22&btnG=&as_sdt=1%2C5&as_sdtp=
482	http://127.0.0.1:8000/scholar_046.html	48	Good or bad bioethanol from a greenhouse gas perspective–what determines this?	http://www.sciencedirect.com/science/article/pii/S0306261908003127	P Börjesson	Applied Energy	2009	Elsevier	Black	... 3. GHG during cultivation. Greenhouse gas emissions during cultivation are made up of carbon dioxide from tractors, fertiliser manufacture, etc. ... cultivation on grass-covered mineral soil, 25, 11, 36. - cultivation on grass-covered peat soil, 25, 210, 230. a ...	165	http://www.lth.se/fileadmin/bioteknik/Utbildning/Kurser/KKKA05/APEN-2009-PalBorjesson.pdf		http://scholar.google.co.uk/scholar?hl=en&q=%22Good+or+bad+bioethanol+from+a+greenhouse+gas+perspective–what+determines+this?%22&btnG=&as_sdt=1%2C5&as_sdtp=
483	http://127.0.0.1:8000/scholar_046.html	48	Physico-chemical and chemical properties of some coconut coir dusts for use as a peat substitute for containerised ornamental plants	http://www.sciencedirect.com/science/article/pii/S0960852401001894	M Abad, P Noguera, R Puchades, A Maquieira…	Bioresource …	2002	Elsevier	Black	... differed significantly between and within sources, and from the control Sphagnum peat. pH of coir dust was slightly acidic, whereas salinity varied dramatically between 39 and 597 mS m −1 in the saturated media extract. The cation exchange capacity and carbon/nitrogen (C/N ...	165			http://scholar.google.co.uk/scholar?hl=en&q=%22Physico-chemical+and+chemical+properties+of+some+coconut+coir+dusts+for+use+as+a+peat+substitute+for+containerised+ornamental+plants%22&btnG=&as_sdt=1%2C5&as_sdtp=
484	http://127.0.0.1:8000/scholar_046.html	48	The relationship between dissolved organic carbon in stream water and soil organic carbon pools at different spatial scales	http://www.cee.mtu.edu/~nurban/classes/ce5508/2007/Readings/Aitkenhead99.pdf	JA Aitkenhead , D Hope, MF Billett	Hydrological Processes	1999		Black	... many catchment variables were co-correlated, slope, peat cover and soil carbon content were important in controlling riverine carbon flux. The aim of this study was to investigate the extent to which these three key variables could be used to predict DOC concentrations in ...	176	http://www.cee.mtu.edu/~nurban/classes/ce5508/2007/Readings/Aitkenhead99.pdf	[PDF]	http://scholar.google.co.uk/scholar?hl=en&q=%22The+relationship+between+dissolved+organic+carbon+in+stream+water+and+soil+organic+carbon+pools+at+different+spatial+scales%22&btnG=&as_sdt=1%2C5&as_sdtp=
485	http://127.0.0.1:8000/scholar_046.html	48	Environmental factors controlling methane emissions from peatlands in northern Minnesota	http://onlinelibrary.wiley.com/doi/10.1029/93JD00160/full	NB Dise, E Gorham , ES Verry	Journal of Geophysical …	1993	Wiley Online Library	Black	... a single habitat in a wetland to several wetlands necessitates incorporation of additional variables to explain flux (water table, peat characteristics), modeling ... After carbon dioxide, methane is the most important radiatively active ("greenhouse") gas, adsorbing infared ...	164	http://conservancy.umn.edu/bitstream/148412/1/Methane%20emissions.pdf		http://scholar.google.co.uk/scholar?hl=en&q=%22Environmental+factors+controlling+methane+emissions+from+peatlands+in+northern+Minnesota%22&btnG=&as_sdt=1%2C5&as_sdtp=
486	http://127.0.0.1:8000/scholar_046.html	48	Subsurface denitrification in a forest riparianzone: interactions between hydrology and supplies ofnitrate and organic carbon	http://link.springer.com/article/10.1023/A:1006476514038	AR Hill, KJ Devito, S Campagnolo, K Sanmugadas	Biogeochemistry	2000	Springer	Black	... Nitrous oxide was determined by using a Hewlett Packard gas chromatograph equipped with an electron capture detector ... All N2O concentrations were corrected for the amount of N2O dissolved in water ... the river at the base of the valley side slope (Figure 1). Peat deposits along ...	258			http://scholar.google.co.uk/scholar?hl=en&q=%22Subsurface+denitrification+in+a+forest+riparianzone:+interactions+between+hydrology+and+supplies+ofnitrate+and+organic+carbon%22&btnG=&as_sdt=1%2C5&as_sdtp=
487	http://127.0.0.1:8000/scholar_046.html	48	CH〈 sub〉 4〈/sub〉 production in blanket bog peat : A procedure for sampling, sectioning and incubating samples whilst maintaining anaerobic conditions	http://www.sciencedirect.com/science/article/pii/0038071795001220	GH Hall, BM Simon, RW Pickup	Soil Biology and Biochemistry	1996	Elsevier	Black	... 3–17. Jones and Simon, 1984; JG Jones, BM Simon; Measure of microbial turnover of carbon in anoxic freshwater sediments: cautionary comments. ... Methane consumption in decomposing Sphagnum-derived peat. Soil Biology & Biochemistry, 22 (1990), pp. 441–447. ...	31			http://scholar.google.co.uk/scholar?hl=en&q=%22CH〈+sub〉+4〈/sub〉+production+in+blanket+bog+peat+:+A+procedure+for+sampling,+sectioning+and+incubating+samples+whilst+maintaining+anaerobic+conditions%22&btnG=&as_sdt=1%2C5&as_sdtp=
488	http://127.0.0.1:8000/scholar_046.html	48	Peat : industrial chemistry and technology	http://books.google.co.uk/books?hl=en&lr=&id=tVGAHybxCkIC&oi=fnd&pg=PP1&dq=peat+%22greenhouse+gas%22+OR+GHG+OR+CO2+OR+%22carbon+dioxide%22+OR+CH4+OR+N2O+OR+methane+OR+%22nitrous+oxide%22+OR+DOC+OR+carbon&ots=LGG0PBuZG1&sig=fFVbSQ2mhYJnPJbMxe6nEHMyjKQ	C Fuchsman				Book	... IV. V. VI. Chapter 15 Peat Tars Distillation of Peat Tar Extraction of Chemical Products from Peat Tar and Peat Tar Distillates Phenolic Resins from Peat Tar Phenols Pyrolysis Water Pyrolysis Gas Activated Carbon from Peat Chapter 16 Chemical Methods of Peat Analysis I. II. III. ...	142		[BOOK]	http://scholar.google.co.uk/scholar?hl=en&q=%22Peat+:+industrial+chemistry+and+technology%22&btnG=&as_sdt=1%2C5&as_sdtp=
489	http://127.0.0.1:8000/scholar_046.html	48	Modeling northern peatland decomposition and peat accumulation	http://link.springer.com/article/10.1007/s10021-001-0105-1	S Frolking, NT Roulet , TR Moore, PJH Richard…	Ecosystems	2001	Springer	Black	... peat. Relative to other ecosystems, northern peatlands have low rates of NPP (Thormann and Bayley 1997), decomposition (Brinson and others 1981; Bartsch and Moore 1985; Johnson and Damman 1993; Belyea 1996; TR Moore unpublished), and net carbon dioxide (CO2) ...	189	http://www.geog.mcgill.ca/faculty/roulet/Published%20Manuscript%20pdfs/Frolking%20et%20al.%20Ecosystems.pdf		http://scholar.google.co.uk/scholar?hl=en&q=%22Modeling+northern+peatland+decomposition+and+peat+accumulation%22&btnG=&as_sdt=1%2C5&as_sdtp=
490	http://127.0.0.1:8000/scholar_046.html	48	Mangroves among the most carbon -rich forests in the tropics	http://www.nature.com/ngeo/journal/vaop/ncurrent/full/ngeo1123.html	DC Donato , JB Kauffman, D Murdiyarso …	Nature …	2011	nature.com	Black	... use change currently account for 8–20% of global anthropogenic carbon dioxide (CO 2 ... organic-rich layer overlying hard coral sand or rock, with peat/muck thickness ... C storage, and extensive deforestation/degradation resulting in potentially large greenhouse gas emissions. ...	249	http://www.cebem.org/cmsfiles/publicaciones/MangroveCarbonStorage.pdf		http://scholar.google.co.uk/scholar?hl=en&q=%22Mangroves+among+the+most+carbon+-rich+forests+in+the+tropics%22&btnG=&as_sdt=1%2C5&as_sdtp=
491	http://127.0.0.1:8000/scholar_047.html	49	Relation of organic matter to organic carbon in the peat soils of New York	https://dl.sciencesocieties.org/publications/aj/abstracts/24/6/AJ0240060477	BD Wilson, EV Staker	Agronomy Journal	1932		Black	The. organic m&tter of soils is ofteri determined quantitatively by multiplying the percentage of organic carbon in the soil by the Van Bemmelen factor 1.724. In using the factor it is assumed that the organic matter of the soil contains 58% of carbon. A critical study of the methods ...	15		[CITATION]	http://scholar.google.co.uk/scholar?hl=en&q=%22Relation+of+organic+matter+to+organic+carbon+in+the+peat+soils+of+New+York%22&btnG=&as_sdt=1%2C5&as_sdtp=
492	http://127.0.0.1:8000/scholar_047.html	49	The leading role of actinobacteria in aerobic cellulose degradation in Sphagnum peat bogs	http://www.springerlink.com/index/E1T61550N274L871.pdf	TA Pankratov, SN Dedysh, GA Zavarzin	Doklady Biological Sciences	2006	Springer	Black	... ecosystem of the boreal zone of the northern hemisphere; the largest peat bogs are located in Russia (139 × 106 ha) [1]. Glo- bally, peat bogs serve as a CO2 sink and a huge basin for accumulation of organic matter, which concentrates about 455 × 109 t of carbon [2]. At least ...	17			http://scholar.google.co.uk/scholar?hl=en&q=%22The+leading+role+of+actinobacteria+in+aerobic+cellulose+degradation+in+Sphagnum+peat+bogs%22&btnG=&as_sdt=1%2C5&as_sdtp=
493	http://127.0.0.1:8000/scholar_047.html	49	Release and dispersion of vegetation and peat fire emissions in the atmosphere over Indonesia 1997/1998	http://www.atmos-chem-phys.net/4/2145/	B Langmann , A Heil	Atmospheric Chemistry and Physics	2004		Black	... to June 1998 makes up 380MtC (6% of the mean annual global carbon emissions from fossil fuels), from which CO2 represents about 83%, CO 14%, TPM-carbon 2% and CH4 1%, respectively ... 2002) of 2570MtC, even though the same extent of fire-damaged peat areas is ...	47	http://www.atmos-chem-phys.net/4/2145/2004/acp-4-2145-2004.pdf		http://scholar.google.co.uk/scholar?hl=en&q=%22Release+and+dispersion+of+vegetation+and+peat+fire+emissions+in+the+atmosphere+over+Indonesia+1997/1998%22&btnG=&as_sdt=1%2C5&as_sdtp=
494	http://127.0.0.1:8000/scholar_047.html	49	Total carbon and nitrogen in the soils of the world	http://onlinelibrary.wiley.com/doi/10.1111/j.1365-2389.1996.tb01386.x/full	NH Batjes	European journal of soil science	1996	Wiley Online Library	Black	... is univer- sally determined by oxidation to C02, and is directly measured as CO2 or by ... To this end expert estimates of organic carbon, carbonate carbon and soil nitrogen content were ... attributed to differences in fibre content and degree of humification of the peat soils considered ...	1741	http://library.wur.nl/isric/fulltext/isricu_t47d6414d_001.pdf		http://scholar.google.co.uk/scholar?hl=en&q=%22Total+carbon+and+nitrogen+in+the+soils+of+the+world%22&btnG=&as_sdt=1%2C5&as_sdtp=
495	http://127.0.0.1:8000/scholar_047.html	49	Carbon dioxide and methane dynamics and annual carbon balance in tundra wetland in NE Europe, Russia	http://onlinelibrary.wiley.com/doi/10.1029/2002GB001930/full	JEP Heikkinen, V Elsakov…	Global Biogeochemical …	2002	Wiley Online Library	Black	... [1993, 1994] suggest that arctic tundra will become a net source of atmospheric carbon dioxide (CO 2 ) due to warming driven drying of peat. ... There is still a very limited number of studies showing the greenhouse gas efflux patterns for the whole winter period [Sommerfeld et al ...	80	http://onlinelibrary.wiley.com/doi/10.1029/2002GB001930/full	[HTML]	http://scholar.google.co.uk/scholar?hl=en&q=%22Carbon+dioxide+and+methane+dynamics+and+annual+carbon+balance+in+tundra+wetland+in+NE+Europe,+Russia%22&btnG=&as_sdt=1%2C5&as_sdtp=
496	http://127.0.0.1:8000/scholar_047.html	49	Carbon dioxide and methane fluxes from the ombrotrophic parts of a subarctic mire	http://www.jstor.org/stable/20112775	BH Svensson	Ecological Bulletins	1980	JSTOR	Black	... The cylinders were driven 8 cm into the peat after pre-boring with a peat corer in each small quadrat and after cutting vascular plants at the moss surface. ... dioxide and methane fluxes, temperature (for the climate station) and moisture are given for the six ... CO2 CH4 Temp. ...	99			http://scholar.google.co.uk/scholar?hl=en&q=%22Carbon+dioxide+and+methane+fluxes+from+the+ombrotrophic+parts+of+a+subarctic+mire%22&btnG=&as_sdt=1%2C5&as_sdtp=
497	http://127.0.0.1:8000/scholar_047.html	49	Organic matter accumulation, peat chemistry, and permafrost melting in peatlands of boreal Alberta.	http://www.cabdirect.org/abstracts/20001916152.html	MR Turetsky, RK Wieder, CJ Williams , DH Vitt	Ecoscience	2000	cabdirect.org	Black	... internal lawn. As decomposition in peatlands is influenced by nutrient limitations and organic matter quality, peat chemistry is likely to be a critical factor in the carbon balance response of boreal peatlands to climate change. ...	78			http://scholar.google.co.uk/scholar?hl=en&q=%22Organic+matter+accumulation,+peat+chemistry,+and+permafrost+melting+in+peatlands+of+boreal+Alberta.%22&btnG=&as_sdt=1%2C5&as_sdtp=
498	http://127.0.0.1:8000/scholar_047.html	49	The effects of acidity on carbon fluxes from ombrotrophic peat	http://www.tandfonline.com/doi/abs/10.1080/02757549408038552	LJ Sanger, MF Billett, MS Cresser	Chemistry and Ecology	1994		Black	Abstract Replicate intact peat/vegetation monoliths were collected along a pollution gradient in the UK and subjected over one year to 1200 mm of simulated rainfall of the same chemical composition as they received in the field. Drainage water was analysed ...	20			http://scholar.google.co.uk/scholar?hl=en&q=%22The+effects+of+acidity+on+carbon+fluxes+from+ombrotrophic+peat%22&btnG=&as_sdt=1%2C5&as_sdtp=
499	http://127.0.0.1:8000/scholar_047.html	49	Deforestation projections for carbon -rich peat swamp forests of Central Kalimantan, Indonesia	http://link.springer.com/article/10.1007/s00267-011-9643-2	DO Fuller , M Hardiono, E Meijaard	Environmental management	2011	Springer	Black	Abstract We evaluated three spatially explicit land use and cover change (LUCC) models to project deforestation from 2005–2020 in the carbon-rich peat swamp forests (PSF) of Central Kalimantan, Indonesia. Such models are increasingly used to evaluate the impact of ...	13			http://scholar.google.co.uk/scholar?hl=en&q=%22Deforestation+projections+for+carbon+-rich+peat+swamp+forests+of+Central+Kalimantan,+Indonesia%22&btnG=&as_sdt=1%2C5&as_sdtp=
500	http://127.0.0.1:8000/scholar_047.html	49	Influence of water table on carbon dioxide , carbon monoxide, and methane fluxes from taiga bog microcosms	http://onlinelibrary.wiley.com/doi/10.1029/94GB01229/full	DW Funk, ER Pullman, KM Peterson…	Global …	1994	Wiley Online Library	Black	... potential of emitted gases, despite the greater impact of CH4 as a greenhouse gas (20-25 ... The associated increase in release of CO2 by aerobic respiration would exceed any potential benefit ... The large accumulations of peat in taiga wetland softs and the global extent of these ...	123			http://scholar.google.co.uk/scholar?hl=en&q=%22Influence+of+water+table+on+carbon+dioxide+,+carbon+monoxide,+and+methane+fluxes+from+taiga+bog+microcosms%22&btnG=&as_sdt=1%2C5&as_sdtp=
501	http://127.0.0.1:8000/scholar_048.html	50	CH4 emission from a hollow-ridge complex in a raised bog: the role of CH4 production and oxidation	http://link.springer.com/article/10.1023/A:1006351118347	P Frenzel, E Karofeld	Biogeochemistry	2000	Springer	Black	... Potential CH4 production in vitro was higher and the methanogenic association was better adapted to higher temperatures in hollow than in hummock peat. ... Page 2. 92 atmospheric CO2 but also sources for CH4, another greenhouse gas. ...	105			http://scholar.google.co.uk/scholar?hl=en&q=%22CH4+emission+from+a+hollow-ridge+complex+in+a+raised+bog:+the+role+of+CH4+production+and+oxidation%22&btnG=&as_sdt=1%2C5&as_sdtp=
502	http://127.0.0.1:8000/scholar_048.html	50	Peat growth and carbon accumulation rates during the Holocene in boreal mires	http://inis.iaea.org/search/search.aspx?orig_q=RN:33011150	M Klarqvist				Thesis	This thesis is based on accumulation processes in northern mires. In the first study, problems concerning carbon 14 dating of peat were examined by fractionation of bulk peat samples and 14 C AMS dating of the separate fractions. In the following studies, peat ...	14			http://scholar.google.co.uk/scholar?hl=en&q=%22Peat+growth+and+carbon+accumulation+rates+during+the+Holocene+in+boreal+mires%22&btnG=&as_sdt=1%2C5&as_sdtp=
503	http://127.0.0.1:8000/scholar_048.html	50	Development of a peatland complex in boreal western Canada: lateral site expansion and local variability in vegetation succession and long-term peat accumulation	http://www.nrcresearchpress.com/doi/abs/10.1139/b03-076	IE Bauer, LD Gignac, DH Vitt	Canadian Journal of Botany	2003	NRC Research Press	Black	... 847 Introduction Peatlands are wetland ecosystems that accumulate carbon because primary productivity exceeds decomposition. Dead organic material builds up as peat, resulting in a net transfer of carbon from the atmosphere to the soil carbon pool. ...	47	http://nofc.cfs.nrcan.gc.ca/bookstore_pdfs/23819.pdf		http://scholar.google.co.uk/scholar?hl=en&q=%22Development+of+a+peatland+complex+in+boreal+western+Canada:+lateral+site+expansion+and+local+variability+in+vegetation+succession+and+long-term+peat+accumulation%22&btnG=&as_sdt=1%2C5&as_sdtp=
504	http://127.0.0.1:8000/scholar_048.html	50	Dynamics of biogenic gas bubbles in peat and their effects on peatland biogeochemistry	http://onlinelibrary.wiley.com/doi/10.1029/2004GB002330/full	M Strack, E Kellner…	Global Biogeochemical …	2005	Wiley Online Library	Black	... [15] Methane flux was ... Thus, current estimates of the contribution of peatlands to greenhouse gas emissions (based largely on diffusive CH 4 emissions) may ... Floating peat, such as that present in kettle-bogs or hydroelectric reservoirs, has higher CH 4 emissions than peat areas ...	78	http://onlinelibrary.wiley.com/doi/10.1029/2004GB002330/full	[HTML]	http://scholar.google.co.uk/scholar?hl=en&q=%22Dynamics+of+biogenic+gas+bubbles+in+peat+and+their+effects+on+peatland+biogeochemistry%22&btnG=&as_sdt=1%2C5&as_sdtp=
505	http://127.0.0.1:8000/scholar_048.html	50	Estimation of the impact of oil palm plantation establishment on greenhouse gas balance	http://link.springer.com/article/10.1007/s10668-006-9080-1	J Germer, J Sauerborn	Environment	2008	Springer	Black	... Carbon dioxide (CO 2 ) storage and sequestration in the Leyte Geothermal Reservation, Philippines, World Geothermal ... Agronomic management of oil palms on deep peat. ... Potential of agroforestry for carbon sequestration and mitigation of greenhouse gas emissions from soils ...	105	http://www.sekala.net/files/oilpalm%26carbon.pdf		http://scholar.google.co.uk/scholar?hl=en&q=%22Estimation+of+the+impact+of+oil+palm+plantation+establishment+on+greenhouse+gas+balance%22&btnG=&as_sdt=1%2C5&as_sdtp=
506	http://127.0.0.1:8000/scholar_048.html	50	Soil surface CO2 flux in a Minnesota peatland	http://link.springer.com/article/10.1007/BF00000425	J Kim, SB Verma	Biogeochemistry	1992	Springer	Black	... 4). For the six- month period (May-October), the total soil CO2 released from this ... Future studies should include measurements of moss dark respiration and peat moisture content to ... Res. 18: 189-193 Moore TR & Knowles R (1987) Methane and carbon dioxide evolution from ...	91			http://scholar.google.co.uk/scholar?hl=en&q=%22Soil+surface+CO2+flux+in+a+Minnesota+peatland%22&btnG=&as_sdt=1%2C5&as_sdtp=
507	http://127.0.0.1:8000/scholar_048.html	50	Carbon balance in managed tropical peat in Central Kalimantan, Indonesia		J Jauhiainen, H Vasander, A Jaya, I Takashi…	… the 12th International Peat …			Conference		22		[CITATION]	http://scholar.google.co.uk/scholar?hl=en&q=%22Carbon+balance+in+managed+tropical+peat+in+Central+Kalimantan,+Indonesia%22&btnG=&as_sdt=1%2C5&as_sdtp=
508	http://127.0.0.1:8000/scholar_048.html	50	Humus in northern forests: friend or foe?	http://www.sciencedirect.com/science/article/pii/S0378112799002959	CE Prescott, DG Maynard , R Laiho	Forest ecology and management	2000	Elsevier	Black	... Humus; Decomposition; Disturbance; Peat; Harvesting; Site preparation. ... During the early phase carbon is relatively available and nutrients are limiting, and there is immobilization of the limiting nutrient (usually N). Once the litter reaches the second stage, it can be considered ...	145			http://scholar.google.co.uk/scholar?hl=en&q=%22Humus+in+northern+forests:+friend+or+foe?%22&btnG=&as_sdt=1%2C5&as_sdtp=
509	http://127.0.0.1:8000/scholar_048.html	50	Response of climate to solar forcing recorded in a 6000-yearδ18O time-series of Chinese peat cellulose	http://hol.sagepub.com/content/10/1/1.short	YT Hong, HB Jiang, TS Liu, LP Zhou, J Beer, HD Li…	The …	2000		Black	... environments. Radio- carbon 40, 535–50. White, JWC, Cials, P., Figgo, RA, Kenny, R. and Markgraf, V. 1994: A high-resolution record of atmospheric CO2 content from carbon isotopes in peat. Nature 365(13), 153–56. Wigley ...	168	http://www.rengy.org/uploadfile/file/%E4%B8%AD%E6%96%87%E7%89%88/%E8%B5%84%E6%BA%90/%E6%96%87%E7%8C%AE/2000/Response%20of%20climate%20to%20solar%20forcing%20recorded%20in%20a%206000-year%20time-series%20of%20Chinese%20peat%20cellulose%20%20.pdf		http://scholar.google.co.uk/scholar?hl=en&q=%22Response+of+climate+to+solar+forcing+recorded+in+a+6000-yearδ18O+time-series+of+Chinese+peat+cellulose%22&btnG=&as_sdt=1%2C5&as_sdtp=
510	http://127.0.0.1:8000/scholar_048.html	50	Diurnal oscillations of gas production and effluxes ( CO2 and CH4 ) in cores from a peat bog	http://www.tandfonline.com/doi/abs/10.1076/brhm.29.3.247.1442	KKL Thomas, JJ Benstead, SSH Lloyd…	Biological rhythm …	1998		Black	Peat cores (15 cm diam X 30 cm deep) from Ellergower Moss, New Galloway, Scotland were kept and monitored at constant temperature (10±0.1 ºC) for gas production using a 1.6 mm diam stainless steel probe fitted with a membrane inlet and connected to a quadrupole ...	18	http://127.0.0.1:8000/scholar?q=info:BnKKjCWIOH8J:scholar.google.com/&output=instlink&hl=en&as_sdt=0,5&scillfp=8929481431618393380&oi=lle		http://scholar.google.co.uk/scholar?hl=en&q=%22Diurnal+oscillations+of+gas+production+and+effluxes+(+CO2+and+CH4+)+in+cores+from+a+peat+bog%22&btnG=&as_sdt=1%2C5&as_sdtp=
511	http://127.0.0.1:8000/scholar_049.html	51	Methane emission from natural wetlands: Global distribution, area, and environmental characteristics of sources	http://onlinelibrary.wiley.com/doi/10.1029/GB001i001p00061/full	E Matthews, I Fung	Global biogeochemical cycles	1987	Wiley Online Library	Black	... Global wetland areas have been estimated by several authors, generally in the context of carbon studies [Twenhofel, 1926, 1951 ... and Rosswall, 1984], nutrient input and organic accumulation [Harriss and Sebacher, 1981], water and peat content of ... Methane flux measurements ...	902			http://scholar.google.co.uk/scholar?hl=en&q=%22Methane+emission+from+natural+wetlands:+Global+distribution,+area,+and+environmental+characteristics+of+sources%22&btnG=&as_sdt=1%2C5&as_sdtp=
512	http://127.0.0.1:8000/scholar_049.html	51	The effect of plant roots on CO 2 release from peat soil	http://inis.iaea.org/search/search.aspx?orig_q=RN:25009571	J Silvola, J Alm , U Ahlholm				Conference	... COMPOUNDS, CARBON OXIDES, CHALCOGENIDES, ECOSYSTEMS, ENERGY SOURCES, FOSSIL FUELS, FUELS, OXIDES, OXYGEN COMPOUNDS DEIBENCH-SCALE EXPERIMENTS, CARBON DIOXIDE, EMISSION, FIELD TESTS, PEAT, ROOTS, WETLANDS ...	23			http://scholar.google.co.uk/scholar?hl=en&q=%22The+effect+of+plant+roots+on+CO+2+release+from+peat+soil%22&btnG=&as_sdt=1%2C5&as_sdtp=
513	http://127.0.0.1:8000/scholar_049.html	51	Carbon accumulation and C/N ratios of peat bogs in North‐West Scotland	http://www.tandfonline.com/doi/abs/10.1080/00369220218737155	DE Anderson	The Scottish Geographical Magazine	2002		Black	Abstract Three different Scottish peat bogs were sampled, dated and analysed for carbon (C) and nitrogen (N) concentrations. The mean long‐term apparent rate of C accumulation (LARCA) for the three bogs is 213 g C m∼ 2 yr‐1'over the past eight to nine thousand ...	15	http://127.0.0.1:8000/scholar?q=info:FzyzsC4txmoJ:scholar.google.com/&output=instlink&hl=en&as_sdt=0,5&scillfp=3418185030157551436&oi=lle		http://scholar.google.co.uk/scholar?hl=en&q=%22Carbon+accumulation+and+C/N+ratios+of+peat+bogs+in+North‐West+Scotland%22&btnG=&as_sdt=1%2C5&as_sdtp=
514	http://127.0.0.1:8000/scholar_049.html	51	Carbon allocation to ectomycorrhizal roots and mycelium colonising different mineral substrates	http://onlinelibrary.wiley.com/doi/10.1111/j.1469-8137.2004.01080.x/full	A Rosling, BD Lindahl, RD Finlay	New Phytologist	2004	Wiley Online Library	Black	... removed and replaced with the mineral dishes so that the mineral sprinkled surface of the dishes was level with the surrounding peat. ... was regulated by an infrared gas analysis (IRGA) CO 2 system (ADC BioScientific Ltd, Herts, UK) to maintain a carbon dioxide concentration of ...	67	http://onlinelibrary.wiley.com/doi/10.1111/j.1469-8137.2004.01080.x/full	[HTML]	http://scholar.google.co.uk/scholar?hl=en&q=%22Carbon+allocation+to+ectomycorrhizal+roots+and+mycelium+colonising+different+mineral+substrates%22&btnG=&as_sdt=1%2C5&as_sdtp=
515	http://127.0.0.1:8000/scholar_049.html	51	Annual cycle of methane emission from a boreal fen measured by the eddy covariance technique	http://onlinelibrary.wiley.com/doi/10.1111/j.1600-0889.2007.00261.x/full	J Rinne, T Riutta, M Pihlatie, M Aurela, S Haapanala…	Tellus B	2007	Wiley Online Library	Black	... In addition, we aim to assess the importance of methane for the carbon and greenhouse gas balances of the fen, and to ... Seasonal CO2 balances of a sub-arctic mire. ... Methane production and consumption in temperate and sub-arctic peat soils – response to temperature and Ph. ...	115	http://onlinelibrary.wiley.com/doi/10.1111/j.1600-0889.2007.00261.x/full	[HTML]	http://scholar.google.co.uk/scholar?hl=en&q=%22Annual+cycle+of+methane+emission+from+a+boreal+fen+measured+by+the+eddy+covariance+technique%22&btnG=&as_sdt=1%2C5&as_sdtp=
516	http://127.0.0.1:8000/scholar_049.html	51	Shift from acetoclastic to H2-dependent methanogenesis in a West Siberian peat bog at low pH values and isolation of an acidophilic Methanobacterium strain	http://aem.asm.org/content/73/7/2344.short	OR Kotsyurbenko, MW Friedrich…	Applied and …	2007	Am Soc Microbiol	Black	... acid-tolerant methanogens of a methane-emitting acidic peat. Appl. Environ. Microbiol. 69:74-83. Abstract/FREE Full Text. ↵ Hornibrook, ERC, FJ Longstaffe, and WS Fyfe. 2000. Evolution of stable carbon isotope compositions for methane and carbon dioxide in freshwater ...	72	http://aem.asm.org/content/73/7/2344.full		http://scholar.google.co.uk/scholar?hl=en&q=%22Shift+from+acetoclastic+to+H2-dependent+methanogenesis+in+a+West+Siberian+peat+bog+at+low+pH+values+and+isolation+of+an+acidophilic+Methanobacterium+strain%22&btnG=&as_sdt=1%2C5&as_sdtp=
517	http://127.0.0.1:8000/scholar_049.html	51	The carbon budget of terrestrial ecosystems at country-scale–a European case study	http://www.biogeosciences.net/2/15/2005/bg-2-15-2005.html	IA Janssens , A Freibauer, B Schlamadinger…	…	2005	biogeosciences.net	Black	... Carbon losses related to the use of peat in horticul- ture/agriculture, and as fuel were ... For those countries where peat extraction was reported in volumetric units, a bulk den- sity of ... Forest productivity is very high in Europe because of increas- ing atmospheric CO2, high nitrogen ...	154	http://www.biogeosciences.net/2/15/2005/bg-2-15-2005.pdf		http://scholar.google.co.uk/scholar?hl=en&q=%22The+carbon+budget+of+terrestrial+ecosystems+at+country-scale–a+European+case+study%22&btnG=&as_sdt=1%2C5&as_sdtp=
518	http://127.0.0.1:8000/scholar_049.html	51	Nitrous oxide and methane fluxes from organic soils under agriculture	http://onlinelibrary.wiley.com/doi/10.1046/j.1365-2389.1998.00156.x/full	H Flessa, U Wild, M Klemisch…	European Journal of …	1998	Wiley Online Library	Black	... We assume that the main reason for the small N2O emissions was the high degree of peat decomposition as a result ... Due to the intensive drainage, all sites were a net sink for atmospheric CH4. ... Profile nitrous oxide and carbon dioxide concentrations in a soil subject to freezing. ...	129			http://scholar.google.co.uk/scholar?hl=en&q=%22Nitrous+oxide+and+methane+fluxes+from+organic+soils+under+agriculture%22&btnG=&as_sdt=1%2C5&as_sdtp=
519	http://127.0.0.1:8000/scholar_049.html	51	Production of dissolved organic carbon in forested catchments	http://www.sciencedirect.com/science/article/pii/S0022169499001328	D Hongve	Journal of Hydrology	1999	Elsevier	Black	... spruce litter, around 2% of the total solid carbon during the study period, while the yield from peat was less than 1%. During the autumn months, live moss (Sphagnum) gave percolates with around the same colour intensities and higher DOC concentrations than peat from 10 ...	131			http://scholar.google.co.uk/scholar?hl=en&q=%22Production+of+dissolved+organic+carbon+in+forested+catchments%22&btnG=&as_sdt=1%2C5&as_sdtp=
520	http://127.0.0.1:8000/scholar_049.html	51	The legacy of wetland drainage on the remaining peat in the Sacramento—San Joaquin Delta, California, USA	http://link.springer.com/article/10.1672/08-97.1	JZ Drexler, CS de Fontaine, SJ Deverel	Wetlands	2009	Springer	Black	... peat soils can liberate vast quantities of CO2 (Armentano 1980, Stephens et al ... of secondary subsidence in the Delta has been microbial oxidation of organic carbon, whereby organic carbon in the peat is converted by microorganisms into carbon dioxide (Deverel and ...	35	http://deltarevision.com/2009_even_more_docs/twitchel2009.pdf		http://scholar.google.co.uk/scholar?hl=en&q=%22The+legacy+of+wetland+drainage+on+the+remaining+peat+in+the+Sacramento—San+Joaquin+Delta,+California,+USA%22&btnG=&as_sdt=1%2C5&as_sdtp=
521	http://127.0.0.1:8000/scholar_053.html	52	13C/12C ratio in peat cores: record of past climates	http://link.springer.com/chapter/10.1007/3-540-26531-7_7	G Skrzypek , MO Jedrysek	Environmental Chemistry	2005	Springer	Black	... Pa rt I methanogenesis/oxidation of methane seems to be crucial (Jedrysek 1995, 1999; Jedrysek et al ... matter (vegetation) is governed by a few factors: the isotopic composition of CO2 assimilated, the ... Many of these factors can be neglected here as each peat bog studied shows ...	20			http://scholar.google.co.uk/scholar?hl=en&q=%2213C/12C+ratio+in+peat+cores:+record+of+past+climates%22&btnG=&as_sdt=1%2C5&as_sdtp=
522	http://127.0.0.1:8000/scholar_053.html	52	Degradation of cultivated peat soils in Northern Norway based on field scale CO 2, N 2 O and CH 4 emission measurements	http://www.ingentaconnect.com/content/tandf/gags/2006/00000052/00000002/art00004	A Grønlund, T Sveistrup, A Søvik…	Archives of Agronomy …	2006	ingentaconnect.com	Black	... carbon as stored in the atmosphere. Conversion of natural peatland ecosystems into arable land dramatically increases soil organic matter mineralization, notably because of the required drainage operations. In the present paper, greenhouse gas emissions from cultivated peat ...	23			http://scholar.google.co.uk/scholar?hl=en&q=%22Degradation+of+cultivated+peat+soils+in+Northern+Norway+based+on+field+scale+CO+2,+N+2+O+and+CH+4+emission+measurements%22&btnG=&as_sdt=1%2C5&as_sdtp=
523	http://127.0.0.1:8000/scholar_053.html	52	Archaeal rRNA diversity and methane production in deep boreal peat	http://onlinelibrary.wiley.com/doi/10.1111/j.1574-6941.2009.00738.x/full	A Putkinen, H Juottonen, S Juutinen…	FEMS microbiology …	2009	Wiley Online Library	Black	Abstract Northern peatlands play a major role in the global carbon cycle as sinks for CO 2 and as sources of CH 4. These diverse ecosystems develop through accumulation of partially decomposed plant material as peat. With increasing depth, peat becomes more ...	20	http://onlinelibrary.wiley.com/doi/10.1111/j.1574-6941.2009.00738.x/full	[HTML]	http://scholar.google.co.uk/scholar?hl=en&q=%22Archaeal+rRNA+diversity+and+methane+production+in+deep+boreal+peat%22&btnG=&as_sdt=1%2C5&as_sdtp=
524	http://127.0.0.1:8000/scholar_053.html	52	5 The carbon budget of upland peat soils	http://books.google.co.uk/books?hl=en&lr=&id=tij5UeqSTgwC&oi=fnd&pg=PA93&dq=peat+%22greenhouse+gas%22+OR+GHG+OR+CO2+OR+%22carbon+dioxide%22+OR+CH4+OR+N2O+OR+methane+OR+%22nitrous+oxide%22+OR+DOC+OR+carbon&ots=W3SeFBKqgO&sig=0IhaAs51AQog1AeJyUEXjF4ckj8	F Worrall, MG Evans	Drivers of environmental change in …	2008		Book	Within the terrestrial biosphere the northern peatlands are the most important carbon store. Gorham (1991) has estimated that 20–30 per cent of the global terrestrial carbon is held in 3 per cent of its land area, ie in northern peatlands, storing 450 Gtonnes Carbon (C). Over ...	15			http://scholar.google.co.uk/scholar?hl=en&q=%225+The+carbon+budget+of+upland+peat+soils%22&btnG=&as_sdt=1%2C5&as_sdtp=
525	http://127.0.0.1:8000/scholar_053.html	52	An ecological perspective on methane emissions from northern wetlands	http://www.sciencedirect.com/science/article/pii/0169534794903093	JL Bubier, TR Moore	Trends in ecology & evolution	1994	Elsevier	Black	... are significant sources of atmospheric methane, an important radlatlvely active 'greenhouse' gas that accounts ... have high fluxes because of degrading peat deeper in the peat profiles? ... However, studies of peatland development suggest that CH4 emissions will change naturally ...	137	http://home.mtholyoke.edu/courses/jbubier/pdf/BM94TREE8.PDF		http://scholar.google.co.uk/scholar?hl=en&q=%22An+ecological+perspective+on+methane+emissions+from+northern+wetlands%22&btnG=&as_sdt=1%2C5&as_sdtp=
[truncated: 473 more rows]

## Sheet: SR1 Title
Generated on October 1st 2014 at 2:21:21pm by nealhaddaway
Result Number	Source Page URL	Page number	Title	Link	Authors	Journal	Year	Source	Grey/Black	Description	Gs citations	Full text	Format
[truncated: 1,000 more rows]

## Sheet: SR2 Full Text
Generated on September 18th 2014 at 5:30:10pm by nealhaddaway
Result number	Source Page URL	Page number	Title	Link	Authors	Journal	Year	Source	Grey/Black	Description	Gs citations	Full text	Format
[truncated: 990 more rows]

## Sheet: SR2 Title
Generated on October 1st 2014 at 2:12:54pm by nealhaddaway
[truncated: 969 more rows]

## Sheet: SR3 Full Text
Generated on September 19th 2014 at 10:53:22am by nealhaddaway
[truncated: 1,001 more rows]

[truncated: 9 more sheets: SR3 Title, SR4 Full Text, SR4 Title, SR5 Full Text, SR5 Title, SR6 Full Text, SR6 Title, SR7 Full Text, SR7 Title]
